# Supplementary material for: Comparative Rumen Metagenome and CAZyme Profiles in Cattle and Buffaloes: Implications for Methane Yield and Rumen Fermentation on a Common Diet
Source: MDPI journal article supplement (doi:10.3390/microorganisms12010047), 2023-12-27
Supplement: s1 [file s1]

## Supplementary

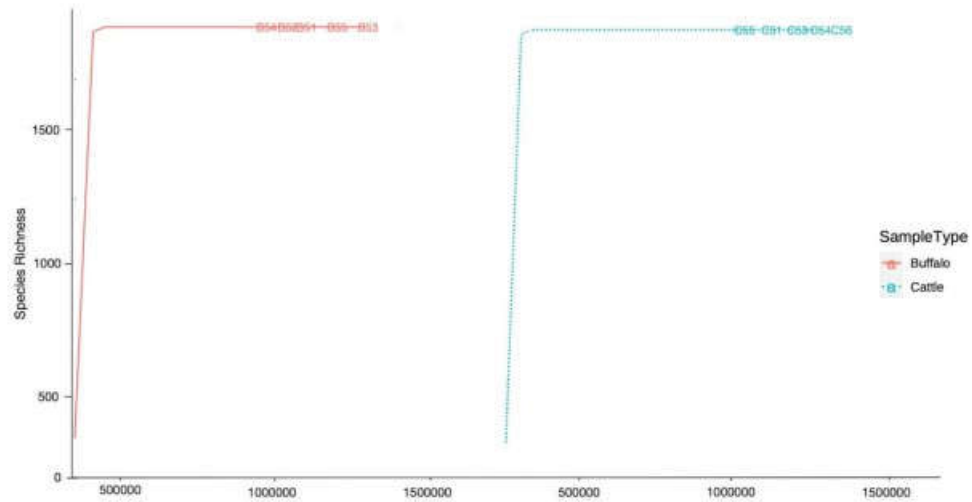

**Figure S1.** Rarefaction curves of cattle and buffaloes rumen metagenome.

**Supplementary File S1:** Read stats and taxonomic assignments of the rumen microbiota

**Supplementary File S2:** CAZymes abundances
