# Supplementary material for: Comparative Rumen Metagenome and CAZyme Profiles in Cattle and Buffaloes: Implications for Methane Yield and Rumen Fermentation on a Common Diet
Source: Microorganisms. 2023 Dec 27;12(1):47. doi: 10.3390/microorganisms12010047 (PMC10818812; doi:10.3390/microorganisms12010047)
Supplement: Supplementary file 1 [file microorganisms-12-00047-s001.zip › Supplementary File S1.xlsx]

## Sheet: Read stats
Sample	Input	GB Data	Both pairs surviving	(%)	Forward Surviving	(%)	Reverse Surviving	(%)	Dropped Reads	(%)
B51	12449494	3.73485	9982460	80.18	1876233	15.07	337873	2.71	252928	2.03		Cattle	Reads	Buffalo	Reads
B52	13899447	4.16983	11438142	82.29	1797269	12.93	388717	2.8	275319	1.98		C1	10117911	B51	12449494
B53	11201431	3.36043	9261784	82.68	1394046	12.45	318607	2.84	226994	2.03		C2	11578323	B52	13899447
B54	11695309	3.50859	9978793	85.32	1183297	10.12	344356	2.94	188863	1.61		C3	12046024	B53	11201431
B55	10892158	3.26765	8747816	80.31	1626244	14.93	315371	2.9	202727	1.86		C4	10733423	B54	11695309
C51	10117911	3.03537	8123870	80.29	1479746	14.63	304998	3.01	209297	2.07		C5	13538410	B55	10892158
C53	11578323	3.4735	9872539	85.27	1168986	10.1	350571	3.03	186227	1.61		Total	58014091	Total	60137839
C54	12046024	3.61381	10396160	86.3	1102023	9.15	339043	2.81	208798	1.73
C55	10733423	3.22003	9150707	85.25	1086977	10.13	302345	2.82	193394	1.8
C56	13538410	4.06152	11978100	88.47	955668	7.06	377855	2.79	226787	1.68
Host Sequence contamination
	Overall alignment Score (%) with Respective genome
Sample	For PE	For Unpaired R1	For Unpaired R2	Total	Ref Genome
B51	0.63	0.52	0.77	1.92	Buffalo
B52	0.09	0.09	0.11	0.29	Buffalo
B53	0.37	0.38	0.41	1.16	Buffalo
B54	0.07	0.11	0.1	0.28	Buffalo
B55	0.17	0.19	0.22	0.58	Buffalo
C51	0.2	0.22	0.34	0.76	Cattle
C53	0.5	0.5	0.51	1.51	Cattle
C54	0.8	0.83	0.86	2.49	Cattle
C55	0.25	0.27	0.29	0.81	Cattle
C56	4	4.12	3.78	11.9	Cattle
Average	0.708	0.723	0.739	2.17
SD	1.18113	1.21465	1.09839	3.49231

## Sheet: Phylum
Phylum	Cattle	Buffalo			Wilcox Test
Bacteroidetes	34.697	33.777			Phylum	statistic	p	p.adj	p.adj.signif			Table Analyzed	F/B Ratio
Firmicutes	22.77	23.016			Acidobacteria	11	0.914	0.98255	ns
Proteobacteria	19.458	20.251			Actinobacteria	10	0.762	0.98255	ns			Column B	Buffaloes
Actinobacteria	9.293	9.01			Aquificae	16	0.476	0.98255	ns			vs.	vs.
Fibrobacteres	4.637	4.368			Armatimonadetes	14	0.762	0.98255	ns			Column A	Cattle
Euryarchaeota	3.309	3.239			Atribacterota	16	0.476	0.98255	ns
Cyanobacteria	1.239	1.498			Bacteroidetes	14	0.762	0.98255	ns			Unpaired t test
Tenericutes	0.96	1.057			Balneolaeota	21	0.0667	0.717025	ns			P value	0.4944
Spirochaetes	0.641	0.716			Calditrichaeota	3	0.0667	0.717025	ns			P value summary	ns
Planctomycetes	0.563	0.548			Candidatus_Absconditabacteria	13	0.914	0.98255	ns			Significantly different (P < 0.05)?	No
Fusobacteria	0.436	0.49			Candidatus_Bipolaricaulota	12	1	1	ns			One- or two-tailed P value?	Two-tailed
Verrucomicrobia	0.352	0.346			Candidatus_Cloacimonetes	18	0.257	0.98255	ns			t, df	t=0.7160, df=8
Deinococcus_Thermus	0.255	0.253			Candidatus_Lokiarchaeota	13	0.914	0.98255	ns
Synergistetes	0.19	0.188			Candidatus_Omnitrophica	14	0.762	0.98255	ns			How big is the difference?
Acidobacteria	0.186	0.178			Candidatus_Saccharibacteria	18	0.257	0.98255	ns			Mean of column A	0.652
Chloroflexi	0.168	0.174			Candidatus_Thermoplasmatota	2	0.0381	0.717025	ns			Mean of column B	0.688
Thermotogae	0.114	0.124			Chlamydiae	19	0.171	0.98255	ns			Difference between means (B - A) ± SEM	0.03600 ± 0.05028
Crenarchaeota	0.088	0.103			Chlorobi	8	0.476	0.98255	ns			95% confidence interval	-0.07994 to 0.1519
Chlorobi	0.1	0.095			Chloroflexi	15	0.61	0.98255	ns			R squared (eta squared)	0.06022
Candidatus_Thermoplasmatota	0.074	0.065			Chrysiogenetes	15	0.61	0.98255	ns
Thaumarchaeota	0.044	0.051			Crenarchaeota	14	0.762	0.98255	ns			F test to compare variances
Chlamydiae	0.04	0.047			Cyanobacteria	19	0.171	0.98255	ns			F, DFn, Dfd	1.445, 4, 4
Deferribacteres	0.044	0.046			Deferribacteres	15	0.61	0.98255	ns			P value	0.7301
Kiritimatiellaeota	0.047	0.046			Deinococcus_Thermus	12	1	1	ns			P value summary	ns
Gemmatimonadetes	0.042	0.04			Dictyoglomi	15	0.61	0.98255	ns			Significantly different (P < 0.05)?	No
Candidatus_Saccharibacteria	0.03	0.037			Elusimicrobia	11	0.914	0.98255	ns
Nitrospirae	0.034	0.036			Euryarchaeota	11	0.914	0.98255	ns			Data analyzed
Aquificae	0.028	0.03			Fibrobacteres	7	0.352	0.98255	ns			Sample size, column A	5
Elusimicrobia	0.024	0.027			Firmicutes	13	0.914	0.98255	ns			Sample size, column B	5
Dictyoglomi	0.021	0.025			Fusobacteria	15	0.61	0.98255	ns
Thermodesulfobacteria	0.024	0.023			Gemmatimonadetes	9	0.61	0.98255	ns
Armatimonadetes	0.016	0.016			Ignavibacteriae	14	0.762	0.98255	ns
Ignavibacteriae	0.014	0.015			Kiritimatiellaeota	10	0.762	0.98255	ns			Cattle rumen metagenome_ Bacteroidetes and Firmicutes correlation
Chrysiogenetes	0.008	0.01			Nanoarchaeota	10	0.762	0.98255	ns			Pearson r
Balneolaeota	0.009	0.009			Nitrospirae	15	0.61	0.98255	ns			r	-0.7549
Candidatus_Lokiarchaeota	0.009	0.009			Planctomycetes	12	1	1	ns			95% confidence interval	-0.9827 to 0.3813
Candidatus_Absconditabacteria	0.007	0.007			Proteobacteria	21	0.0667	0.717025	ns			R squared	0.5699
Candidatus_Omnitrophica	0.007	0.007			Spirochaetes	14	0.762	0.98255	ns
Calditrichaeota	0.008	0.007			Synergistetes	11	0.914	0.98255	ns			P value
Nanoarchaeota	0.004	0.005			Tenericutes	14	0.762	0.98255	ns			P (two-tailed)	0.1402
Atribacterota	0.003	0.004			Thaumarchaeota	16	0.476	0.98255	ns			P value summary	ns
Candidatus_Bipolaricaulota	0.004	0.004			Thermodesulfobacteria	13	0.914	0.98255	ns			Significant? (alpha = 0.05)	No
Candidatus_Cloacimonetes	0.003	0.004			Thermotogae	14	0.762	0.98255	ns
					Verrucomicrobia	11	0.914	0.98255	ns			Number of XY Pairs	5
												Buffalo rumen metagenome_ Bacteroidetes and Firmicutes correlation
												Pearson r
												r	-0.8617
												95% confidence interval	-0.9908 to 0.08559
												R squared	0.7426
												P value
												P (two-tailed)	0.0604
												P value summary	ns
												Significant? (alpha = 0.05)	No
												Number of XY Pairs	5
												Pooled rumen metagenome_ Bacteroidetes and Firmicutes correlation
												Pearson r
												r	-0.7662
												95% confidence interval	-0.9416 to -0.2639
												R squared	0.5871
												P value
												P (two-tailed)	0.0097
												P value summary	**
												Significant? (alpha = 0.05)	Yes
												Number of XY Pairs	10

## Sheet: Class
Class	Buffalo	Cattle			Wilcox Test
Bacteroidia	28.781	29.702			Class	statistic	p	p.adj	p.adj.signif
Clostridia	15.685	15.654			Thermodesulfovibrionia	23	0.019	1	ns
Gammaproteobacteria	8.423	7.659			Calditrichia	3	0.0667	1	ns
Actinomycetia	7.722	7.961			Gammaproteobacteria	21	0.0667	1	ns
Bacilli	6.199	5.932			Thermoplasmata	3	0.0667	1	ns
Alphaproteobacteria	5.149	5.204			Ardenticatenia	4	0.114	1	ns
Fibrobacteria	4.618	4.899			Candidatus_Saccharimonadia	19	0.171	1	ns
Flavobacteriia	3.083	2.896			Chlamydiia	19	0.171	1	ns
Betaproteobacteria	3.059	2.991			Methanomicrobia	5	0.171	1	ns
Methanobacteria	2.895	2.958			Saprospiria	5	0.171	1	ns
Deltaproteobacteria	1.811	1.851			Caldilineae	18	0.257	1	ns
Cytophagia	1.805	1.886			Fimbriimonadia	18	0.257	1	ns
Coriobacteriia	1.41	1.463			Gloeobacteria	18	0.257	1	ns
Epsilonproteobacteria	1.051	0.938			Zetaproteobacteria	18	0.257	1	ns
Mollicutes	1.007	0.914			Candidatus_Brocadiia	17	0.352	1	ns
Negativicutes	0.841	0.791			Dehalococcoidia	17	0.352	1	ns
Spirochaetia	0.757	0.677			Endomicrobia	17	0.352	1	ns
Sphingobacteriia	0.605	0.618			Fibrobacteria	7	0.352	1	ns
Fusobacteriia	0.518	0.46			Negativicutes	17	0.352	1	ns
Planctomycetia	0.481	0.494			Nitrospira	7	0.352	1	ns
Chitinophagia	0.385	0.401			Phycisphaerae	7	0.352	1	ns
Erysipelotrichia	0.358	0.347			Aquificae	16	0.476	1	ns
Tissierellia	0.333	0.306			Archaeoglobi	8	0.476	1	ns
Deinococci	0.268	0.27			Atribacteria	16	0.476	1	ns
Halobacteria	0.248	0.249			Chloroflexia	16	0.476	1	ns
Synergistia	0.199	0.201			Chthonomonadetes	8	0.476	1	ns
Verrucomicrobiae	0.187	0.189			Elusimicrobia	8	0.476	1	ns
Methanomicrobia	0.152	0.167			Thermococci	16	0.476	1	ns
Opitutae	0.15	0.153			Tissierellia	16	0.476	1	ns
Thermotogae	0.131	0.121			Acidithiobacillia	15	0.61	1	ns
Acidobacteriia	0.125	0.132			Chrysiogenetes	15	0.61	1	ns
Thermoprotei	0.109	0.093			Deferribacteres	15	0.61	1	ns
Chlorobia	0.1	0.106			Dictyoglomia	15	0.61	1	ns
Thermoleophilia	0.076	0.074			Fusobacteriia	15	0.61	1	ns
Phycisphaerae	0.074	0.077			Gemmatimonadetes	9	0.61	1	ns
Methanococci	0.072	0.064			Acidimicrobiia	14	0.762	1	ns
Thermoplasmata	0.068	0.076			Anaerolineae	10	0.762	1	ns
Rubrobacteria	0.064	0.061			Bacilli	14	0.762	1	ns
Oligoflexia	0.06	0.058			Betaproteobacteria	14	0.762	1	ns
Acidimicrobiia	0.05	0.051			Candidatus_Thermofonsia	10	0.762	1	ns
Chlamydiia	0.05	0.042			Chlorobia	10	0.762	1	ns
Deferribacteres	0.049	0.046			Cytophagia	10	0.762	1	ns
Dehalococcoidia	0.043	0.031			Epsilonproteobacteria	14	0.762	1	ns
Gemmatimonadetes	0.042	0.044			Erysipelotrichia	14	0.762	1	ns
Thermococci	0.037	0.036			Flavobacteriia	14	0.762	1	ns
Anaerolineae	0.033	0.034			Halobacteria	14	0.762	1	ns
Saprospiria	0.032	0.037			Holophagae	14	0.762	1	ns
Candidatus_Saccharimonadia	0.032	0.026			Ignavibacteria	14	0.762	1	ns
Aquificae	0.032	0.029			Kiritimatiellae	14	0.762	1	ns
Vicinamibacteria	0.028	0.029			Ktedonobacteria	10	0.762	1	ns
Dictyoglomia	0.026	0.022			Mollicutes	14	0.762	1	ns
Nitriliruptoria	0.026	0.028			Nitriliruptoria	10	0.762	1	ns
Nitrospira	0.026	0.026			Rubrobacteria	14	0.762	1	ns
Kiritimatiellae	0.025	0.026			Spirochaetia	14	0.762	1	ns
Acidithiobacillia	0.025	0.023			Thermoprotei	14	0.762	1	ns
Thermodesulfobacteria	0.025	0.025			Thermotogae	14	0.762	1	ns
Gloeobacteria	0.023	0.022			Tichowtungiia	10	0.762	1	ns
Chloroflexia	0.022	0.022			Verrucomicrobiae	14	0.762	1	ns
Ardenticatenia	0.021	0.023			Vicinamibacteria	14	0.762	1	ns
Tichowtungiia	0.02	0.021			Acidobacteriia	11	0.914	1	ns
Holophagae	0.02	0.02			Actinomycetia	11	0.914	1	ns
Endomicrobia	0.019	0.016			Bacteroidia	13	0.914	1	ns
Thermomicrobia	0.018	0.018			Blastocatellia	13	0.914	1	ns
Nitrososphaeria	0.017	0.016			Candidatus_Babeliae	13	0.914	1	ns
Limnochordia	0.016	0.016			Candidatus_Uabimicrobiia	13	0.914	1	ns
Ignavibacteria	0.016	0.015			Chitinophagia	11	0.914	1	ns
Caldilineae	0.013	0.012			Deltaproteobacteria	11	0.914	1	ns
Blastocatellia	0.013	0.015			Hydrogenophilalia	13	0.914	1	ns
Tepidiformia	0.013	0.013			Limnochordia	11	0.914	1	ns
Thermodesulfovibrionia	0.012	0.01			Nanobdellia	11	0.914	1	ns
Candidatus_Babeliae	0.011	0.009			Nitrososphaeria	13	0.914	1	ns
Fimbriimonadia	0.011	0.011			Opitutae	11	0.914	1	ns
Candidatus_Uabimicrobiia	0.011	0.011			Thermodesulfobacteria	13	0.914	1	ns
Chrysiogenetes	0.01	0.009			Thermoleophilia	13	0.914	1	ns
Elusimicrobia	0.009	0.01			Thermomicrobia	13	0.914	1	ns
Zetaproteobacteria	0.009	0.009			Alphaproteobacteria	12	1	1	ns
Candidatus_Brocadiia	0.008	0.007			Clostridia	12	1	1	ns
Calditrichia	0.007	0.009			Coriobacteriia	12	1	1	ns
Methylacidiphilae	0.006	0.006			Deinococci	12	1	1	ns
Archaeoglobi	0.006	0.006			Methanobacteria	12	1	1	ns
Ktedonobacteria	0.006	0.006			Methanococci	12	1	1	ns
Nanobdellia	0.005	0.004			Methylacidiphilae	12	1	1	ns
Chthonomonadetes	0.005	0.006			Oligoflexia	12	1	1	ns
Candidatus_Thermofonsia	0.005	0.005			Planctomycetia	12	1	1	ns
Atribacteria	0.005	0.003			Sphingobacteriia	12	1	1	ns
Hydrogenophilalia	0.004	0.003			Synergistia	12	1	1	ns
					Tepidiformia	12	1	1	ns

## Sheet: Order
Order	Buffalo	Cattle			Wilcox Test
Bacteroidales	28.999	29.997			Order	statistic	p	p.adj	p.adj.signif
Eubacteriales	15.393	15.438			Acanthopleuribacterales	14	0.762	1	ns
Fibrobacterales	4.676	4.972			Acholeplasmatales	13	0.914	1	ns
Bacillales	4.303	4.146			Acidaminococcales	14	0.762	1	ns
Flavobacteriales	3.121	2.94			Acidiferrobacterales	14	0.762	1	ns
Methanobacteriales	2.931	3.003			Acidilobales	17	0.352	1	ns
Hyphomicrobiales	2.242	2.248			Acidimicrobiales	14	0.762	1	ns
Burkholderiales	2.201	2.152			Acidithiobacillales	15	0.61	1	ns
Enterobacterales	2.032	1.905			Acidobacteriales	12	1	1	ns
Cytophagales	1.828	1.915			Acidothermales	12	1	1	ns
Lactobacillales	1.821	1.72			Actinomycetales	15	0.61	1	ns
Micrococcales	1.774	1.868			Actinopolysporales	12	1	1	ns
Pseudomonadales	1.385	1.222			Aeromonadales	17	0.352	1	ns
Corynebacteriales	1.385	1.425			Alteromonadales	19	0.171	1	ns
Streptomycetales	1.362	1.388			Anaerolineales	10	0.762	1	ns
Campylobacterales	1.01	0.905			Aquificales	16	0.476	1	ns
Nostocales	0.935	0.68			Archaeoglobales	8	0.476	1	ns
Xanthomonadales	0.925	0.812			Ardenticatenales	5	0.171	1	ns
Sphingomonadales	0.758	0.803			Bacillales	14	0.762	1	ns
Eggerthellales	0.738	0.779			Bacteriovoracales	10	0.762	1	ns
Coriobacteriales	0.653	0.67			Bacteroidales	12	1	1	ns
Rhodobacterales	0.637	0.663			Bacteroidetes_Order_II__Incertae_sedis	6	0.257	1	ns
Sphingobacteriales	0.612	0.627			Bdellovibrionales	18	0.257	1	ns
Spirochaetales	0.584	0.521			Bifidobacteriales	9	0.61	1	ns
Rhodospirillales	0.572	0.572			Brachyspirales	11	0.914	1	ns
Desulfovibrionales	0.563	0.592			Bradymonadales	12	1	1	ns
Mycoplasmatales	0.542	0.494			Bryobacterales	4	0.114	1	ns
Alteromonadales	0.537	0.467			Burkholderiales	14	0.762	1	ns
Propionibacteriales	0.536	0.567			Caldilineales	18	0.257	1	ns
Fusobacteriales	0.524	0.467			Calditrichales	3	0.0667	1	ns
Aeromonadales	0.486	0.411			Campylobacterales	14	0.762	1	ns
Myxococcales	0.472	0.481			Candidatus_Absconditabacterales	13	0.914	1	ns
Selenomonadales	0.467	0.411			Candidatus_Babeliales	13	0.914	1	ns
Moraxellales	0.409	0.386			Candidatus_Brocadiales	18	0.257	1	ns
Oceanospirillales	0.392	0.389			Candidatus_Nanopelagicales	16	0.476	1	ns
Desulfuromonadales	0.39	0.399			Candidatus_Nanosynbacterales	15	0.61	1	ns
Chitinophagales	0.39	0.407			Candidatus_Saccharimonadales	20	0.114	1	ns
Pseudonocardiales	0.389	0.406			Candidatus_Sulfidibacteriales	12	1	1	ns
Neisseriales	0.374	0.364			Candidatus_Uabimicrobiales	12	1	1	ns
Vibrionales	0.373	0.34			Cardiobacteriales	16	0.476	1	ns
Erysipelotrichales	0.362	0.352			Catenulisporales	15	0.61	1	ns
Bifidobacteriales	0.352	0.366			Caulobacterales	10	0.762	1	ns
Entomoplasmatales	0.329	0.296			Cellvibrionales	14	0.762	1	ns
Micromonosporales	0.306	0.311			Chitinophagales	11	0.914	1	ns
Actinomycetales	0.296	0.297			Chlamydiales	19	0.171	1	ns
Tissierellales	0.294	0.272			Chlorobiales	8	0.476	1	ns
Thermoanaerobacterales	0.284	0.256			Chloroflexales	16	0.476	1	ns
Pasteurellales	0.282	0.202			Chromatiales	15	0.61	1	ns
Chromatiales	0.272	0.274			Chroococcales	11	0.914	1	ns
Synechococcales	0.256	0.255			Chroococcidiopsidales	10	0.762	1	ns
Desulfobacterales	0.25	0.249			Chrysiogenales	15	0.61	1	ns
Caulobacterales	0.216	0.231			Chthonomonadales	8	0.476	1	ns
Streptosporangiales	0.212	0.222			Coriobacteriales	10	0.762	1	ns
Synergistales	0.201	0.204			Corynebacteriales	9	0.61	1	ns
Rhodocyclales	0.193	0.194			Cytophagales	10	0.762	1	ns
Acidaminococcales	0.189	0.194			Deferribacterales	15	0.61	1	ns
Verrucomicrobiales	0.189	0.192			Dehalococcoidales	20	0.114	1	ns
Rickettsiales	0.181	0.163			Deinococcales	12	1	1	ns
Thiotrichales	0.179	0.163			Desulfarculales	9	0.61	1	ns
Veillonellales	0.177	0.181			Desulfobacterales	10	0.762	1	ns
Deinococcales	0.176	0.18			Desulfovibrionales	8	0.476	1	ns
Pirellulales	0.166	0.176			Desulfuromonadales	11	0.914	1	ns
Nitrosomonadales	0.162	0.163			Dictyoglomales	15	0.61	1	ns
Cellvibrionales	0.145	0.144			Eggerthellales	10	0.762	1	ns
Planctomycetales	0.143	0.145			Egibacterales	12	1	1	ns
Chroococcales	0.133	0.124			Egicoccales	11	0.914	1	ns
Acholeplasmatales	0.129	0.119			Elusimicrobiales	7	0.352	1	ns
Methylococcales	0.128	0.126			Emcibacterales	15	0.61	1	ns
Opitutales	0.124	0.127			Endomicrobiales	17	0.352	1	ns
Legionellales	0.12	0.109			Enterobacterales	18	0.257	1	ns
Brachyspirales	0.118	0.106			Entomoplasmatales	13	0.914	1	ns
Halobacteriales	0.11	0.108			Erysipelotrichales	13	0.914	1	ns
Acidobacteriales	0.108	0.113			Eubacteriales	12	1	1	ns
Marinilabiliales	0.103	0.105			Euzebyales	8	0.476	1	ns
Chlorobiales	0.102	0.107			Fibrobacterales	7	0.352	1	ns
Oscillatoriales	0.099	0.096			Fimbriimonadales	18	0.257	1	ns
Mycoplasmoidales	0.091	0.083			Flavobacteriales	14	0.762	1	ns
Thermales	0.082	0.081			Frankiales	16	0.476	1	ns
Gemmatales	0.082	0.082			Fusobacteriales	15	0.61	1	ns
Sulfolobales	0.082	0.071			Gemmatales	13	0.914	1	ns
Bacteroidetes_Order_II__Incertae_sedis	0.081	0.094			Gemmatimonadales	9	0.61	1	ns
Methanosarcinales	0.076	0.089			Geodermatophilales	8	0.476	1	ns
Halanaerobiales	0.075	0.069			Gloeobacterales	18	0.257	1	ns
Methanococcales	0.073	0.065			Glycomycetales	15	0.61	1	ns
Isosphaerales	0.069	0.071			Halanaerobiales	13	0.914	1	ns
Pseudanabaenales	0.066	0.065			Halobacteriales	13	0.914	1	ns
Rubrobacterales	0.064	0.061			Haloferacales	12	1	1	ns
Thermotogales	0.063	0.058			Holosporales	17	0.352	1	ns
Leptospirales	0.063	0.058			Hydrogenophilales	13	0.914	1	ns
Natrialbales	0.061	0.063			Hyphomicrobiales	12	1	1	ns
Haloferacales	0.06	0.06			Hyphomonadales	6	0.257	1	ns
Methanomicrobiales	0.059	0.06			Ignavibacteriales	14	0.762	1	ns
Solirubrobacterales	0.058	0.057			Immundisolibacterales	15	0.61	1	ns
Methanomassiliicoccales	0.056	0.067			Isosphaerales	11	0.914	1	ns
Petrotogales	0.052	0.048			Jatrophihabitantales	11	0.914	1	ns
Pelagibacterales	0.051	0.046			Jiangellales	17	0.352	1	ns
Acidimicrobiales	0.051	0.052			Kangiellales	8	0.476	1	ns
Deferribacterales	0.05	0.047			Kineosporiales	14	0.762	1	ns
Nautiliales	0.049	0.044			Kiritimatiellales	14	0.762	1	ns
Gemmatimonadales	0.042	0.045			Kordiimonadales	15	0.61	1	ns
Candidatus_Sulfidibacteriales	0.041	0.039			Kosmotogales	18	0.257	1	ns
Thermococcales	0.037	0.036			Ktedonobacterales	10	0.762	1	ns
Frankiales	0.034	0.035			Lactobacillales	14	0.762	1	ns
Anaerolineales	0.034	0.035			Legionellales	14	0.762	1	ns
Orbales	0.034	0.032			Leptospirales	15	0.61	1	ns
Saprospirales	0.033	0.037			Limnochordales	11	0.914	1	ns
Dehalococcoidales	0.032	0.018			Maricaulales	20	0.114	1	ns
Bradymonadales	0.032	0.032			Marinilabiliales	15	0.61	1	ns
Phycisphaerales	0.031	0.032			Mariprofundales	18	0.257	1	ns
Sedimentisphaerales	0.03	0.032			Mesoaciditogales	7	0.352	1	ns
Nitrosopumilales	0.03	0.026			Methanobacteriales	12	1	1	ns
Maricaulales	0.029	0.027			Methanocellales	7	0.352	1	ns
Vicinamibacterales	0.029	0.029			Methanococcales	12	1	1	ns
Nevskiales	0.027	0.028			Methanomassiliicoccales	5	0.171	1	ns
Dictyoglomales	0.027	0.022			Methanomicrobiales	9	0.61	1	ns
Geodermatophilales	0.026	0.028			Methanosarcinales	7	0.352	1	ns
Nitrospirales	0.026	0.026			Methanotrichales	12	1	1	ns
Kiritimatiellales	0.026	0.027			Methylacidiphilales	12	1	1	ns
Acidithiobacillales	0.025	0.024			Methylococcales	14	0.762	1	ns
Thermodesulfobacteriales	0.025	0.026			Micrococcales	9	0.61	1	ns
Parachlamydiales	0.025	0.02			Micromonosporales	14	0.762	1	ns
Chlamydiales	0.025	0.022			Miltoncostaeales	17	0.352	1	ns
Aquificales	0.025	0.023			Moraxellales	15	0.61	1	ns
Puniceicoccales	0.024	0.025			Mycoplasmatales	14	0.762	1	ns
Acidiferrobacterales	0.024	0.024			Mycoplasmoidales	13	0.914	1	ns
Gloeobacterales	0.024	0.022			Myxococcales	12	1	1	ns
Bdellovibrionales	0.023	0.022			Nakamurellales	9	0.61	1	ns
Hyphomonadales	0.023	0.024			Nanobdellales	10	0.762	1	ns
Holosporales	0.022	0.019			Natranaerobiales	13	0.914	1	ns
Chloroflexales	0.022	0.022			Natrialbales	14	0.762	1	ns
Ardenticatenales	0.021	0.024			Nautiliales	15	0.61	1	ns
Silvanigrellales	0.021	0.019			Neisseriales	11	0.914	1	ns
Tichowtungiales	0.02	0.021			Nevskiales	10	0.762	1	ns
Syntrophobacterales	0.02	0.019			Nitrosomonadales	14	0.762	1	ns
Endomicrobiales	0.02	0.016			Nitrosopumilales	15	0.61	1	ns
Nakamurellales	0.019	0.021			Nitrososphaerales	10	0.762	1	ns
Cardiobacteriales	0.019	0.019			Nitrospirales	7	0.352	1	ns
Syntrophales	0.018	0.019			Nostocales	19	0.171	1	ns
Desulfarculales	0.018	0.018			Oceanospirillales	14	0.762	1	ns
Miltoncostaeales	0.018	0.017			Opitutales	10	0.762	1	ns
Bryobacterales	0.018	0.02			Orbales	13	0.914	1	ns
Natranaerobiales	0.018	0.017			Oscillatoriales	16	0.476	1	ns
Bacteriovoracales	0.017	0.017			Parachlamydiales	17	0.352	1	ns
Jiangellales	0.017	0.015			Parvularculales	11	0.914	1	ns
Pleurocapsales	0.017	0.016			Pasteurellales	19	0.171	1	ns
Candidatus_Nanopelagicales	0.017	0.016			Pelagibacterales	12	1	1	ns
Candidatus_Nanosynbacterales	0.017	0.014			Petrotogales	13	0.914	1	ns
Limnochordales	0.016	0.016			Phototrophicales	10	0.762	1	ns
Ignavibacteriales	0.016	0.015			Phycisphaerales	10	0.762	1	ns
Glycomycetales	0.015	0.014			Pirellulales	12	1	1	ns
Acanthopleuribacterales	0.015	0.015			Planctomycetales	12	1	1	ns
Nitrososphaerales	0.015	0.014			Pleurocapsales	15	0.61	1	ns
Kosmotogales	0.014	0.012			Propionibacteriales	8	0.476	1	ns
Tepidisphaerales	0.013	0.014			Pseudanabaenales	15	0.61	1	ns
Caldilineales	0.013	0.013			Pseudomonadales	16	0.476	1	ns
Chroococcidiopsidales	0.013	0.013			Pseudonocardiales	12	1	1	ns
Tepidiformales	0.013	0.013			Puniceicoccales	14	0.762	1	ns
Thermodesulfovibrionales	0.013	0.01			Rhodobacterales	10	0.762	1	ns
Thermoplasmatales	0.013	0.01			Rhodocyclales	15	0.61	1	ns
Sphaerobacterales	0.012	0.011			Rhodospirillales	12	1	1	ns
Candidatus_Babeliales	0.012	0.009			Rickettsiales	14	0.762	1	ns
Fimbriimonadales	0.011	0.011			Rubrobacterales	14	0.762	1	ns
Candidatus_Uabimicrobiales	0.011	0.011			Salinisphaerales	19	0.171	1	ns
Chrysiogenales	0.01	0.009			Saprospirales	6	0.257	1	ns
Acidilobales	0.01	0.006			Sedimentisphaerales	6	0.257	1	ns
Catenulisporales	0.01	0.011			Selenomonadales	17	0.352	1	ns
Euzebyales	0.01	0.011			Silvanigrellales	11	0.914	1	ns
Elusimicrobiales	0.009	0.01			Solirubrobacterales	12	1	1	ns
Candidatus_Saccharimonadales	0.009	0.008			Sphaerobacterales	13	0.914	1	ns
Mariprofundales	0.009	0.009			Sphingobacteriales	12	1	1	ns
Kangiellales	0.009	0.009			Sphingomonadales	8	0.476	1	ns
Emcibacterales	0.009	0.008			Spirochaetales	16	0.476	1	ns
Egicoccales	0.009	0.009			Sporichthyales	16	0.476	1	ns
Immundisolibacterales	0.008	0.009			Streptomycetales	11	0.914	1	ns
Methanotrichales	0.008	0.01			Streptosporangiales	10	0.762	1	ns
Trueperales	0.008	0.009			Sulfolobales	13	0.914	1	ns
Jatrophihabitantales	0.008	0.008			Synechococcales	14	0.762	1	ns
Methanocellales	0.008	0.009			Synergistales	11	0.914	1	ns
Candidatus_Absconditabacterales	0.008	0.007			Syntrophales	10	0.762	1	ns
Candidatus_Brocadiales	0.008	0.007			Syntrophobacterales	16	0.476	1	ns
Parvularculales	0.008	0.007			Tepidiformales	12	1	1	ns
Kordiimonadales	0.007	0.007			Tepidisphaerales	8	0.476	1	ns
Calditrichales	0.007	0.009			Thermales	10	0.762	1	ns
Thermoproteales	0.007	0.006			Thermoanaerobacterales	16	0.476	1	ns
Thermomicrobiales	0.007	0.007			Thermococcales	16	0.476	1	ns
Egibacterales	0.007	0.007			Thermodesulfobacteriales	14	0.762	1	ns
Salinisphaerales	0.007	0.006			Thermodesulfovibrionales	23	0.019	1	ns
Methylacidiphilales	0.006	0.006			Thermomicrobiales	8	0.476	1	ns
Kineosporiales	0.006	0.006			Thermoplasmatales	17	0.352	1	ns
Archaeoglobales	0.006	0.006			Thermoproteales	11	0.914	1	ns
Ktedonobacterales	0.006	0.006			Thermotogales	12	1	1	ns
Nanobdellales	0.005	0.004			Thermotomaculales	11	0.914	1	ns
Chthonomonadales	0.005	0.006			Thiotrichales	15	0.61	1	ns
Thermotomaculales	0.005	0.005			Tichowtungiales	10	0.762	1	ns
Phototrophicales	0.005	0.005			Tissierellales	16	0.476	1	ns
Actinopolysporales	0.004	0.005			Trueperales	11	0.914	1	ns
Sporichthyales	0.004	0.004			Veillonellales	10	0.762	1	ns
Acidothermales	0.004	0.004			Verrucomicrobiales	14	0.762	1	ns
Hydrogenophilales	0.004	0.003			Vibrionales	18	0.257	1	ns
Mesoaciditogales	0.003	0.003			Vicinamibacterales	14	0.762	1	ns
					Xanthomonadales	23	0.019	1	ns

## Sheet: Family
Family	Buffalo	Cattle			Wilcox Test
Prevotellaceae	23.075	23.549			Family	statistic	p	p.adj	p.adj.signif
Oscillospiraceae	6.183	5.492			Dermacoccaceae	0	0.00952	1	ns
Fibrobacteraceae	4.891	5.194			Dermabacteraceae	1	0.019	1	ns
Lachnospiraceae	4.157	3.869			Dissulfurispiraceae	23	0.019	1	ns
Methanobacteriaceae	3.058	3.129			Methanomassiliicoccaceae	1	0.019	1	ns
Clostridiaceae	2.724	3.922			Shewanellaceae	23	0.019	1	ns
Bacteroidaceae	2.413	2.526			Xanthomonadaceae	23	0.019	1	ns
Flavobacteriaceae	2.208	2.07			Zooshikellaceae	23	0.019	1	ns
Bacillaceae	1.79	1.73			Budviciaceae	21	0.0667	1	ns
Streptomycetaceae	1.424	1.45			Calditrichaceae	3	0.0667	1	ns
Rikenellaceae	1.371	1.515			Oceanospirillaceae	21	0.0667	1	ns
Pseudomonadaceae	1.369	1.191			Piscirickettsiaceae	21	0.0667	1	ns
Paenibacillaceae	1.263	1.254			Rhabdochlamydiaceae	21	0.0667	1	ns
Hymenobacteraceae	1.115	1.208			Sanguibacteraceae	3	0.0667	1	ns
Enterobacteriaceae	0.924	0.867			Thermodesulfovibrionaceae	21	0.0667	1	ns
Muribaculaceae	0.904	0.984			Actinopolymorphaceae	20	0.114	1	ns
Lactobacillaceae	0.833	0.794			Alteromonadaceae	20	0.114	1	ns
Xanthomonadaceae	0.813	0.691			Bryobacteraceae	4	0.114	1	ns
Eggerthellaceae	0.772	0.814			Calditerrivibrionaceae	20	0.114	1	ns
Microbacteriaceae	0.766	0.817			Candidatus_Saccharimonadaceae	20	0.114	1	ns
Weeksellaceae	0.728	0.682			Cohaesibacteraceae	20	0.114	1	ns
Burkholderiaceae	0.712	0.7			Corynebacteriaceae	4	0.114	1	ns
Staphylococcaceae	0.689	0.63			Dehalococcoidaceae	20	0.114	1	ns
Comamonadaceae	0.641	0.587			Endozoicomonadaceae	20	0.114	1	ns
Sphingobacteriaceae	0.641	0.655			Hapalosiphonaceae	20	0.114	1	ns
Tannerellaceae	0.616	0.652			Idiomarinaceae	20	0.114	1	ns
Rhizobiaceae	0.574	0.561			Maricaulaceae	20	0.114	1	ns
Mycoplasmataceae	0.567	0.516			Methylobacteriaceae	4	0.114	1	ns
Streptococcaceae	0.551	0.531			Pseudanabaenaceae	20	0.114	1	ns
Sphingomonadaceae	0.548	0.592			Spongiibacteraceae	20	0.114	1	ns
Desulfovibrionaceae	0.535	0.561			Stappiaceae	20	0.114	1	ns
Atopobiaceae	0.487	0.497			Aeromonadaceae	19	0.171	1	ns
Corynebacteriaceae	0.476	0.487			Amoebophilaceae	19	0.171	1	ns
Mycobacteriaceae	0.472	0.492			Ardenticatenaceae	5	0.171	1	ns
Arcobacteraceae	0.447	0.401			Calotrichaceae	19	0.171	1	ns
Selenomonadaceae	0.438	0.379			Candidatus_Methanomethylophilaceae	5	0.171	1	ns
Micrococcaceae	0.434	0.452			Chlamydiaceae	19	0.171	1	ns
Moraxellaceae	0.427	0.403			Desulfurococcaceae	19	0.171	1	ns
Nostocaceae	0.425	0.302			Geminocystaceae	19	0.171	1	ns
Chitinophagaceae	0.408	0.425			Heliobacteriaceae	19	0.171	1	ns
Pseudonocardiaceae	0.407	0.424			Merismopediaceae	19	0.171	1	ns
Peptostreptococcaceae	0.394	0.366			Nostocaceae	19	0.171	1	ns
Vibrionaceae	0.39	0.355			Pasteurellaceae	19	0.171	1	ns
Nitrobacteraceae	0.388	0.388			Salinisphaeraceae	19	0.171	1	ns
Fusobacteriaceae	0.372	0.333			Salinivirgaceae	5	0.171	1	ns
Bifidobacteriaceae	0.368	0.382			Sutterellaceae	19	0.171	1	ns
Erwiniaceae	0.365	0.332			Thalassospiraceae	19	0.171	1	ns
Campylobacteraceae	0.363	0.322			Thermoanaerobacteraceae	19	0.171	1	ns
Treponemataceae	0.345	0.287			Yersiniaceae	19	0.171	1	ns
Porphyromonadaceae	0.342	0.382			Zhaonellaceae	19	0.171	1	ns
Erysipelotrichaceae	0.341	0.332			Anaerohalosphaeraceae	6	0.257	1	ns
Rhodobacteraceae	0.33	0.348			Aphanizomenonaceae	18	0.257	1	ns
Enterococcaceae	0.322	0.286			Bdellovibrionaceae	18	0.257	1	ns
Micromonosporaceae	0.32	0.324			Caldilineaceae	18	0.257	1	ns
Oxalobacteraceae	0.311	0.319			Candidatus_Brocadiaceae	18	0.257	1	ns
Actinomycetaceae	0.309	0.31			Clostridiaceae	6	0.257	1	ns
Aeromonadaceae	0.309	0.252			Enterobacteriaceae	18	0.257	1	ns
Alcaligenaceae	0.297	0.294			Fimbriimonadaceae	18	0.257	1	ns
Pasteurellaceae	0.295	0.211			Gloeobacteraceae	18	0.257	1	ns
Nocardioidaceae	0.294	0.308			Gomontiellaceae	6	0.257	1	ns
Roseobacteraceae	0.293	0.298			Kosmotogaceae	18	0.257	1	ns
Phyllobacteriaceae	0.281	0.284			Kytococcaceae	6	0.257	1	ns
Geobacteraceae	0.273	0.278			Marinifilaceae	18	0.257	1	ns
Nocardiaceae	0.27	0.275			Mariprofundaceae	18	0.257	1	ns
Spiroplasmataceae	0.26	0.232			Marivirgaceae	18	0.257	1	ns
Acetobacteraceae	0.26	0.258			Odoribacteraceae	6	0.257	1	ns
Halomonadaceae	0.254	0.255			Oscillospiraceae	18	0.257	1	ns
Morganellaceae	0.239	0.216			Peptococcaceae	18	0.257	1	ns
Propionibacteriaceae	0.236	0.252			Prochlorotrichaceae	18	0.257	1	ns
Christensenellaceae	0.232	0.236			Propionibacteriaceae	6	0.257	1	ns
Neisseriaceae	0.23	0.214			Pseudoalteromonadaceae	18	0.257	1	ns
Yersiniaceae	0.227	0.216			Rhodothermaceae	6	0.257	1	ns
Caulobacteraceae	0.226	0.241			Syntrophomonadaceae	18	0.257	1	ns
Eubacteriaceae	0.222	0.213			Syntrophotaleaceae	6	0.257	1	ns
Shewanellaceae	0.213	0.174			Thalassobaculaceae	18	0.257	1	ns
Synergistaceae	0.211	0.213			Thermoactinomycetaceae	18	0.257	1	ns
Cytophagaceae	0.202	0.205			Tolypothrichaceae	18	0.257	1	ns
Eubacteriales_Family_XIII__Incertae_Sedis	0.199	0.204			Treponemataceae	18	0.257	1	ns
Peptoniphilaceae	0.199	0.181			Vibrionaceae	18	0.257	1	ns
Acidaminococcaceae	0.198	0.202			Alcanivoracaceae	7	0.352	1	ns
Succinivibrionaceae	0.198	0.177			Bacteriovoracaceae	7	0.352	1	ns
Barnesiellaceae	0.192	0.207			Caldisphaeraceae	17	0.352	1	ns
Planococcaceae	0.192	0.175			Candidatus_Desulfofervidaceae	7	0.352	1	ns
Calotrichaceae	0.189	0.142			Clostridiales_Family_XVI__Incertae_Sedis	7	0.352	1	ns
Spirosomaceae	0.186	0.19			Elusimicrobiaceae	7	0.352	1	ns
Veillonellaceae	0.185	0.19			Endomicrobiaceae	17	0.352	1	ns
Deinococcaceae	0.184	0.188			Enterococcaceae	17	0.352	1	ns
Methylobacteriaceae	0.178	0.206			Ferrimonadaceae	17	0.352	1	ns
Coriobacteriaceae	0.173	0.177			Fibrobacteraceae	7	0.352	1	ns
Leptotrichiaceae	0.173	0.152			Halobacteriaceae	17	0.352	1	ns
Blattabacteriaceae	0.165	0.155			Hyphomonadaceae	7	0.352	1	ns
Dysgonomonadaceae	0.164	0.172			Jiangellaceae	17	0.352	1	ns
Desulfobacteraceae	0.163	0.166			Methanocellaceae	7	0.352	1	ns
Erythrobacteraceae	0.163	0.166			Methanosarcinaceae	7	0.352	1	ns
Synechococcaceae	0.161	0.161			Methylocystaceae	17	0.352	1	ns
Azospirillaceae	0.161	0.161			Miltoncostaeaceae	17	0.352	1	ns
Chromobacteriaceae	0.157	0.161			Nitratiruptoraceae	17	0.352	1	ns
Thermoanaerobacteraceae	0.15	0.138			Nitrospiraceae	7	0.352	1	ns
Planctomycetaceae	0.15	0.151			Oscillatoriaceae	17	0.352	1	ns
Pseudoalteromonadaceae	0.138	0.123			Pectobacteriaceae	17	0.352	1	ns
Cyclobacteriaceae	0.137	0.134			Rhodobacteraceae	7	0.352	1	ns
Pectobacteriaceae	0.137	0.131			Sandaracinaceae	17	0.352	1	ns
Acholeplasmataceae	0.135	0.124			Scytonemataceae	17	0.352	1	ns
Methylococcaceae	0.134	0.131			Selenomonadaceae	17	0.352	1	ns
Rhodanobacteraceae	0.132	0.135			Sporolactobacillaceae	17	0.352	1	ns
Desulfitobacteriaceae	0.131	0.127			Sporomusaceae	17	0.352	1	ns
Opitutaceae	0.13	0.133			Tepidanaerobacteraceae	17	0.352	1	ns
Brachyspiraceae	0.123	0.111			Thioalkalibacteraceae	7	0.352	1	ns
Thermoanaerobacterales_Family_III__Incertae_Sedis	0.113	0.097			Amorphaceae	16	0.476	1	ns
Acidobacteriaceae	0.113	0.118			Archaeoglobaceae	8	0.476	1	ns
Rhodospirillaceae	0.111	0.113			Baekduiaceae	16	0.476	1	ns
Chromatiaceae	0.111	0.111			Bartonellaceae	16	0.476	1	ns
Cellulomonadaceae	0.109	0.11			Bogoriellaceae	16	0.476	1	ns
Ectothiorhodospiraceae	0.109	0.11			Brevibacteriaceae	8	0.476	1	ns
Peptococcaceae	0.108	0.1			Candidatus_Nanopelagicaceae	16	0.476	1	ns
Polyangiaceae	0.108	0.106			Cardiobacteriaceae	16	0.476	1	ns
Francisellaceae	0.107	0.094			Catenulisporaceae	16	0.476	1	ns
Borreliaceae	0.106	0.099			Chloroflexaceae	8	0.476	1	ns
Odoribacteraceae	0.103	0.117			Chromatiaceae	16	0.476	1	ns
Legionellaceae	0.102	0.093			Chthonomonadaceae	8	0.476	1	ns
Carnobacteriaceae	0.102	0.096			Coleofasciculaceae	8	0.476	1	ns
Chlorobiaceae	0.101	0.107			Comamonadaceae	16	0.476	1	ns
Myxococcaceae	0.101	0.104			Coxiellaceae	16	0.476	1	ns
Verrucomicrobiaceae	0.101	0.106			Dermatophilaceae	8	0.476	1	ns
Alteromonadaceae	0.099	0.089			Desulfitobacteriaceae	16	0.476	1	ns
Pirellulaceae	0.098	0.104			Desulfobacteraceae	8	0.476	1	ns
Alicyclobacillaceae	0.097	0.096			Desulfobulbaceae	16	0.476	1	ns
Akkermansiaceae	0.095	0.092			Desulfohalobiaceae	16	0.476	1	ns
Helicobacteraceae	0.093	0.083			Desulfotomaculaceae	16	0.476	1	ns
Anaeromyxobacteraceae	0.093	0.097			Desulfovibrionaceae	8	0.476	1	ns
Anaplasmataceae	0.092	0.081			Erwiniaceae	16	0.476	1	ns
Gordoniaceae	0.09	0.092			Euzebyaceae	8	0.476	1	ns
Devosiaceae	0.088	0.086			Ferroplasmaceae	16	0.476	1	ns
Xanthobacteraceae	0.087	0.085			Frankiaceae	16	0.476	1	ns
Thermaceae	0.086	0.085			Geodermatophilaceae	8	0.476	1	ns
Gemmataceae	0.086	0.086			Glycomycetaceae	16	0.476	1	ns
Sulfolobaceae	0.086	0.075			Hahellaceae	8	0.476	1	ns
Rhodothermaceae	0.085	0.098			Haliscomenobacteraceae	8	0.476	1	ns
Desulfuromonadaceae	0.084	0.089			Halobacteroidaceae	8	0.476	1	ns
Zoogloeaceae	0.083	0.082			Helicobacteraceae	16	0.476	1	ns
Sphaerotilaceae	0.082	0.086			Holosporaceae	16	0.476	1	ns
Methanosarcinaceae	0.08	0.093			Ichthyobacteriaceae	16	0.476	1	ns
Rickettsiaceae	0.08	0.073			Kangiellaceae	8	0.476	1	ns
Nocardiopsaceae	0.079	0.086			Lachnospiraceae	16	0.476	1	ns
Archangiaceae	0.077	0.079			Lichenihabitantaceae	16	0.476	1	ns
Oceanospirillaceae	0.077	0.071			Melioribacteraceae	16	0.476	1	ns
Listeriaceae	0.077	0.068			Methanocorpusculaceae	8	0.476	1	ns
Dermabacteraceae	0.076	0.084			Moraxellaceae	16	0.476	1	ns
Thiovulaceae	0.074	0.066			Morganellaceae	16	0.476	1	ns
Prochlorococcaceae	0.074	0.074			Moritellaceae	16	0.476	1	ns
Metamycoplasmataceae	0.074	0.063			Oculatellaceae	16	0.476	1	ns
Marinobacteraceae	0.074	0.078			Oleiphilaceae	16	0.476	1	ns
Isosphaeraceae	0.073	0.075			Paenibacillaceae	16	0.476	1	ns
Streptosporangiaceae	0.072	0.075			Parachlamydiaceae	16	0.476	1	ns
Aurantimonadaceae	0.072	0.072			Peptoniphilaceae	16	0.476	1	ns
Tissierellaceae	0.071	0.069			Porphyromonadaceae	8	0.476	1	ns
Hapalosiphonaceae	0.071	0.045			Pseudomonadaceae	16	0.476	1	ns
Fulvivirgaceae	0.069	0.069			Saprospiraceae	8	0.476	1	ns
Rhodocyclaceae	0.068	0.069			Sphingomonadaceae	8	0.476	1	ns
Brevibacteriaceae	0.068	0.069			Sporichthyaceae	16	0.476	1	ns
Entomoplasmataceae	0.067	0.06			Sulfurospirillaceae	16	0.476	1	ns
Thermomonosporaceae	0.066	0.066			Syntrophobacteraceae	16	0.476	1	ns
Aphanizomenonaceae	0.066	0.056			Tepidisphaeraceae	8	0.476	1	ns
Leptospiraceae	0.066	0.061			Thermomicrobiaceae	8	0.476	1	ns
Lacipirellulaceae	0.065	0.069			Thermotogaceae	16	0.476	1	ns
Natrialbaceae	0.063	0.066			Thiovulaceae	16	0.476	1	ns
Stappiaceae	0.062	0.06			Acanthopleuribacteraceae	15	0.61	1	ns
Hyphomicrobiaceae	0.062	0.065			Acidithiobacillaceae	15	0.61	1	ns
Vallitaleaceae	0.062	0.055			Actinomycetaceae	15	0.61	1	ns
Microbulbiferaceae	0.061	0.064			Alicyclobacillaceae	15	0.61	1	ns
Desulfobulbaceae	0.06	0.057			Aphanothecaceae	15	0.61	1	ns
Clostridiales_Family_XVII__Incertae_Sedis	0.06	0.061			Bacillales_Family_X__Incertae_Sedis	15	0.61	1	ns
Thermoactinomycetaceae	0.059	0.058			Bernardetiaceae	15	0.61	1	ns
Bartonellaceae	0.059	0.049			Bifidobacteriaceae	9	0.61	1	ns
Flammeovirgaceae	0.059	0.051			Boseaceae	9	0.61	1	ns
Piscirickettsiaceae	0.057	0.051			Candidatus_Deianiraeaceae	15	0.61	1	ns
Spirochaetaceae	0.057	0.055			Candidatus_Midichloriaceae	15	0.61	1	ns
Ornithinimicrobiaceae	0.056	0.058			Candidatus_Nanosynbacteraceae	15	0.61	1	ns
Rubrobacteraceae	0.055	0.054			Cellvibrionaceae	15	0.61	1	ns
Petrotogaceae	0.054	0.05			Chelatococcaceae	9	0.61	1	ns
Chroococcaceae	0.053	0.054			Chrysiogenaceae	15	0.61	1	ns
Haloarculaceae	0.053	0.053			Dermocarpellaceae	15	0.61	1	ns
Sphaerochaetaceae	0.053	0.053			Dictyoglomaceae	15	0.61	1	ns
Cellvibrionaceae	0.051	0.05			Elioraeaceae	15	0.61	1	ns
Intrasporangiaceae	0.051	0.052			Emcibacteraceae	15	0.61	1	ns
Aphanothecaceae	0.051	0.044			Entomoplasmataceae	15	0.61	1	ns
Tenuifilaceae	0.05	0.054			Fluviibacteraceae	9	0.61	1	ns
Halobacteriaceae	0.049	0.047			Fusobacteriaceae	15	0.61	1	ns
Halanaerobiaceae	0.048	0.041			Gallionellaceae	15	0.61	1	ns
Sporomusaceae	0.048	0.047			Gemmatimonadaceae	9	0.61	1	ns
Syntrophomonadaceae	0.047	0.043			Gordoniaceae	9	0.61	1	ns
Colwelliaceae	0.047	0.046			Gottschalkiaceae	15	0.61	1	ns
Prolixibacteraceae	0.047	0.047			Halomonadaceae	15	0.61	1	ns
Pelagibacteraceae	0.047	0.042			Halorubraceae	9	0.61	1	ns
Promicromonosporaceae	0.047	0.05			Hydrogenimonaceae	15	0.61	1	ns
Boseaceae	0.046	0.049			Immundisolibacteraceae	15	0.61	1	ns
Candidatus_Methanomethylophilaceae	0.044	0.05			Intrasporangiaceae	15	0.61	1	ns
Gemmatimonadaceae	0.044	0.047			Kordiimonadaceae	15	0.61	1	ns
Brucellaceae	0.043	0.044			Legionellaceae	15	0.61	1	ns
Methanomicrobiaceae	0.043	0.042			Leptolyngbyaceae	9	0.61	1	ns
Breznakiellaceae	0.043	0.042			Leptospiraceae	15	0.61	1	ns
Leptolyngbyaceae	0.042	0.043			Leptotrichiaceae	15	0.61	1	ns
Fervidobacteriaceae	0.041	0.038			Metamycoplasmataceae	15	0.61	1	ns
Azonexaceae	0.041	0.041			Methanococcaceae	15	0.61	1	ns
Microcoleaceae	0.041	0.039			Methanomicrobiaceae	9	0.61	1	ns
Aerococcaceae	0.041	0.04			Microbacteriaceae	9	0.61	1	ns
Marinilabiliaceae	0.04	0.041			Microcoleaceae	15	0.61	1	ns
Methylocystaceae	0.039	0.037			Nakamurellaceae	9	0.61	1	ns
Paludibacteraceae	0.039	0.048			Natranaerobiaceae	15	0.61	1	ns
Symbiobacteriaceae	0.039	0.038			Nitrosomonadaceae	15	0.61	1	ns
Iamiaceae	0.039	0.04			Nitrosopumilaceae	15	0.61	1	ns
Thermococcaceae	0.039	0.038			Nocardioidaceae	9	0.61	1	ns
Methanocaldococcaceae	0.039	0.035			Paludibacteraceae	9	0.61	1	ns
Desulfomicrobiaceae	0.038	0.041			Paraconexibacteraceae	15	0.61	1	ns
Heliobacteriaceae	0.037	0.034			Parvibaculaceae	15	0.61	1	ns
Turicibacteraceae	0.037	0.035			Picrophilaceae	15	0.61	1	ns
Frankiaceae	0.036	0.036			Promicromonosporaceae	9	0.61	1	ns
Methanococcaceae	0.036	0.031			Psychromonadaceae	15	0.61	1	ns
Hafniaceae	0.036	0.037			Rhodanobacteraceae	9	0.61	1	ns
Anaerolineaceae	0.035	0.036			Rickettsiaceae	15	0.61	1	ns
Orbaceae	0.035	0.033			Rikenellaceae	9	0.61	1	ns
Conexibacteraceae	0.035	0.036			Roseiflexaceae	15	0.61	1	ns
Syntrophotaleaceae	0.034	0.034			Schleiferiaceae	9	0.61	1	ns
Dehalococcoidaceae	0.034	0.019			Sphaerochaetaceae	9	0.61	1	ns
Halorubraceae	0.034	0.034			Sphaerotilaceae	9	0.61	1	ns
Phycisphaeraceae	0.033	0.033			Spirochaetaceae	15	0.61	1	ns
Methylophilaceae	0.032	0.032			Succinivibrionaceae	15	0.61	1	ns
Sterolibacteriaceae	0.032	0.034			Sulfurovaceae	9	0.61	1	ns
Sulfurovaceae	0.031	0.031			Symbiobacteriaceae	15	0.61	1	ns
Nautiliaceae	0.031	0.028			Thermococcaceae	15	0.61	1	ns
Sutterellaceae	0.031	0.03			Thermodesulfobiaceae	15	0.61	1	ns
Nitrosopumilaceae	0.031	0.027			Thermomonosporaceae	15	0.61	1	ns
Maricaulaceae	0.03	0.028			Thermosynechococcaceae	15	0.61	1	ns
Vicinamibacteraceae	0.03	0.031			Thiotrichaceae	9	0.61	1	ns
Sandaracinaceae	0.029	0.027			Vallitaleaceae	15	0.61	1	ns
Oscillatoriaceae	0.028	0.028			Vulgatibacteraceae	9	0.61	1	ns
Gallionellaceae	0.028	0.027			Weeksellaceae	15	0.61	1	ns
Haloferacaceae	0.028	0.028			Wenzhouxiangellaceae	15	0.61	1	ns
Dictyoglomaceae	0.028	0.023			Zoogloeaceae	15	0.61	1	ns
Geodermatophilaceae	0.028	0.03			Acholeplasmataceae	14	0.762	1	ns
Dietziaceae	0.027	0.024			Acidaminococcaceae	14	0.762	1	ns
Sphingosinicellaceae	0.027	0.027			Acidiferrobacteraceae	14	0.762	1	ns
Nitrospiraceae	0.027	0.027			Alcaligenaceae	14	0.762	1	ns
Kiritimatiellaceae	0.027	0.028			Anaeromyxobacteraceae	10	0.762	1	ns
Acidithiobacillaceae	0.026	0.025			Anaplasmataceae	14	0.762	1	ns
Tolypothrichaceae	0.026	0.021			Aquificaceae	14	0.762	1	ns
Thermodesulfobacteriaceae	0.026	0.027			Arcobacteraceae	14	0.762	1	ns
Chlamydiaceae	0.026	0.023			Azonexaceae	14	0.762	1	ns
Bradymonadaceae	0.026	0.026			Azospirillaceae	14	0.762	1	ns
Puniceicoccaceae	0.025	0.026			Bacteroidaceae	10	0.762	1	ns
Acidiferrobacteraceae	0.025	0.025			Barnesiellaceae	10	0.762	1	ns
Ruaniaceae	0.025	0.027			Beijerinckiaceae	10	0.762	1	ns
Thalassospiraceae	0.025	0.024			Beutenbergiaceae	14	0.762	1	ns
Alcanivoracaceae	0.025	0.028			Blastochloridaceae	14	0.762	1	ns
Gloeobacteraceae	0.025	0.023			Breoghaniaceae	10	0.762	1	ns
Thermotogaceae	0.025	0.023			Breznakiellaceae	10	0.762	1	ns
Sulfurospirillaceae	0.024	0.021			Brucellaceae	10	0.762	1	ns
Bdellovibrionaceae	0.024	0.023			Capillimicrobiaceae	10	0.762	1	ns
Nitrosomonadaceae	0.024	0.023			Casimicrobiaceae	14	0.762	1	ns
Sinobacteraceae	0.024	0.025			Caulobacteraceae	10	0.762	1	ns
Hyphomonadaceae	0.024	0.026			Chlorobiaceae	10	0.762	1	ns
Coxiellaceae	0.023	0.02			Chroococcaceae	10	0.762	1	ns
Sulfuricellaceae	0.023	0.024			Chroococcidiopsidaceae	10	0.762	1	ns
Tsukamurellaceae	0.023	0.024			Cytophagaceae	14	0.762	1	ns
Thiotrichaceae	0.023	0.024			Desulfarculaceae	10	0.762	1	ns
Tepidanaerobacteraceae	0.023	0.021			Desulfocapsaceae	10	0.762	1	ns
Bruguierivoracaceae	0.022	0.022			Desulfomicrobiaceae	10	0.762	1	ns
Scytonemataceae	0.022	0.02			Desulfosudaceae	14	0.762	1	ns
Parvibaculaceae	0.022	0.022			Desulfuromonadaceae	10	0.762	1	ns
Bogoriellaceae	0.022	0.02			Devosiaceae	14	0.762	1	ns
Ardenticatenaceae	0.022	0.025			Dysgonomonadaceae	10	0.762	1	ns
Halieaceae	0.022	0.022			Eggerthellaceae	10	0.762	1	ns
Mycoplasmoidaceae	0.022	0.023			Eubacteriales_Family_XIII__Incertae_Sedis	14	0.762	1	ns
Desulfocapsaceae	0.022	0.02			Flammeovirgaceae	14	0.762	1	ns
Kofleriaceae	0.022	0.022			Flavobacteriaceae	14	0.762	1	ns
Silvanigrellaceae	0.022	0.02			Francisellaceae	14	0.762	1	ns
Tichowtungiaceae	0.021	0.022			Fulvivirgaceae	14	0.762	1	ns
Sedimentisphaeraceae	0.021	0.022			Granulosicoccaceae	10	0.762	1	ns
Dermacoccaceae	0.021	0.024			Halanaerobiaceae	14	0.762	1	ns
Syntrophobacteraceae	0.021	0.02			Hymenobacteraceae	10	0.762	1	ns
Endomicrobiaceae	0.021	0.017			Hyphomicrobiaceae	10	0.762	1	ns
Nakamurellaceae	0.02	0.022			Ilumatobacteraceae	14	0.762	1	ns
Nitratiruptoraceae	0.02	0.018			Kineosporiaceae	14	0.762	1	ns
Schleiferiaceae	0.02	0.021			Kiritimatiellaceae	14	0.762	1	ns
Cardiobacteriaceae	0.02	0.02			Kofleriaceae	10	0.762	1	ns
Beijerinckiaceae	0.02	0.02			Kribbellaceae	14	0.762	1	ns
Crocinitomicaceae	0.02	0.019			Ktedonosporobacteraceae	10	0.762	1	ns
Halobacteroidaceae	0.019	0.02			Lacipirellulaceae	14	0.762	1	ns
Marinifilaceae	0.019	0.019			Lactobacillaceae	14	0.762	1	ns
Syntrophaceae	0.019	0.02			Listeriaceae	14	0.762	1	ns
Phreatobacteraceae	0.019	0.02			Methanocaldococcaceae	14	0.762	1	ns
Gottschalkiaceae	0.019	0.016			Methanospirillaceae	14	0.762	1	ns
Desulfarculaceae	0.019	0.019			Methylococcaceae	14	0.762	1	ns
Miltoncostaeaceae	0.019	0.018			Microbulbiferaceae	10	0.762	1	ns
Microcystaceae	0.019	0.018			Micrococcaceae	10	0.762	1	ns
Bryobacteraceae	0.018	0.021			Micromonosporaceae	14	0.762	1	ns
Jiangellaceae	0.018	0.016			Mucispirillaceae	14	0.762	1	ns
Candidatus_Nanopelagicaceae	0.018	0.017			Muribaculaceae	10	0.762	1	ns
Thermohalobacteraceae	0.018	0.017			Mycobacteriaceae	10	0.762	1	ns
Haliscomenobacteraceae	0.018	0.02			Mycoplasmataceae	14	0.762	1	ns
Candidatus_Nanosynbacteraceae	0.017	0.015			Mycoplasmoidaceae	10	0.762	1	ns
Bernardetiaceae	0.017	0.017			Myxococcaceae	10	0.762	1	ns
Holosporaceae	0.017	0.014			Natrialbaceae	14	0.762	1	ns
Limnochordaceae	0.017	0.017			Nitrososphaeraceae	10	0.762	1	ns
Moritellaceae	0.017	0.014			Opitutaceae	10	0.762	1	ns
Labilitrichaceae	0.017	0.018			Ornithinimicrobiaceae	10	0.762	1	ns
Clostridiales_Family_XVI__Incertae_Sedis	0.017	0.019			Oxalobacteraceae	10	0.762	1	ns
Bacillales_Family_X__Incertae_Sedis	0.017	0.016			Phototrophicaceae	10	0.762	1	ns
Amoebophilaceae	0.017	0.013			Phycisphaeraceae	10	0.762	1	ns
Saprospiraceae	0.017	0.019			Planococcaceae	14	0.762	1	ns
Roseiflexaceae	0.016	0.016			Polyangiaceae	14	0.762	1	ns
Glycomycetaceae	0.016	0.015			Proteinivoraceae	14	0.762	1	ns
Budviciaceae	0.016	0.014			Puniceicoccaceae	14	0.762	1	ns
Acanthopleuribacteraceae	0.016	0.016			Rhodospirillaceae	10	0.762	1	ns
Nitrososphaeraceae	0.016	0.015			Rivulariaceae	14	0.762	1	ns
Spongiibacteraceae	0.016	0.014			Rubrobacteraceae	14	0.762	1	ns
Usitatibacteraceae	0.015	0.016			Sedimentisphaeraceae	10	0.762	1	ns
Dermatophilaceae	0.015	0.017			Streptosporangiaceae	10	0.762	1	ns
Rivulariaceae	0.015	0.014			Sulfuricellaceae	14	0.762	1	ns
Ferrimonadaceae	0.015	0.014			Synechococcaceae	14	0.762	1	ns
Wenzhouxiangellaceae	0.015	0.014			Syntrophaceae	10	0.762	1	ns
Vulgatibacteraceae	0.015	0.016			Terasakiellaceae	14	0.762	1	ns
Geminocystaceae	0.014	0.012			Thermincolaceae	14	0.762	1	ns
Mucispirillaceae	0.014	0.013			Thermoanaerobacterales_Family_III__Incertae_Sedis	14	0.762	1	ns
Dermocarpellaceae	0.014	0.014			Thermodesulfobacteriaceae	14	0.762	1	ns
Kosmotogaceae	0.014	0.013			Thermoguttaceae	14	0.762	1	ns
Tepidisphaeraceae	0.014	0.015			Thiobacillaceae	10	0.762	1	ns
Caldilineaceae	0.014	0.013			Tichowtungiaceae	10	0.762	1	ns
Endozoicomonadaceae	0.014	0.013			Vicinamibacteraceae	14	0.762	1	ns
Saccharospirillaceae	0.014	0.013			Acaryochloridaceae	11	0.914	1	ns
Chroococcidiopsidaceae	0.014	0.014			Aerococcaceae	11	0.914	1	ns
Halobacteriovoraceae	0.013	0.013			Anaerolineaceae	11	0.914	1	ns
Methanomassiliicoccaceae	0.013	0.019			Archangiaceae	11	0.914	1	ns
Tepidiformaceae	0.013	0.014			Aurantimonadaceae	13	0.914	1	ns
Parachlamydiaceae	0.013	0.01			Blattabacteriaceae	13	0.914	1	ns
Thiobacillaceae	0.013	0.013			Borreliaceae	13	0.914	1	ns
Kribbellaceae	0.013	0.013			Brachyspiraceae	11	0.914	1	ns
Salinivirgaceae	0.013	0.014			Bradymonadaceae	11	0.914	1	ns
Thermoanaerobacterales_Family_IV__Incertae_Sedis	0.013	0.013			Bruguierivoracaceae	13	0.914	1	ns
Aquificaceae	0.012	0.012			Burkholderiaceae	13	0.914	1	ns
Sphaerobacteraceae	0.012	0.012			Campylobacteraceae	13	0.914	1	ns
Blastochloridaceae	0.012	0.012			Candidatus_Absconditicoccaceae	13	0.914	1	ns
Fimbriimonadaceae	0.012	0.012			Candidatus_Babeliaceae	13	0.914	1	ns
Desulfosudaceae	0.012	0.012			Candidatus_Chromulinivoraceae	11	0.914	1	ns
Candidatus_Uabimicrobiaceae	0.012	0.012			Chamaesiphonaceae	13	0.914	1	ns
Baekduiaceae	0.012	0.01			Chromobacteriaceae	11	0.914	1	ns
Desulfallaceae	0.012	0.011			Conexibacteraceae	11	0.914	1	ns
Deferribacteraceae	0.012	0.011			Coriobacteriaceae	11	0.914	1	ns
Chelatococcaceae	0.012	0.013			Crocinitomicaceae	11	0.914	1	ns
Capillimicrobiaceae	0.012	0.011			Deferribacteraceae	13	0.914	1	ns
Marivirgaceae	0.012	0.01			Desulfallaceae	13	0.914	1	ns
Thermodesulfobiaceae	0.011	0.01			Ectothiorhodospiraceae	13	0.914	1	ns
Paraconexibacteraceae	0.011	0.01			Egicoccaceae	11	0.914	1	ns
Beutenbergiaceae	0.011	0.011			Erysipelotrichaceae	11	0.914	1	ns
Idiomarinaceae	0.011	0.01			Eubacteriaceae	13	0.914	1	ns
Chrysiogenaceae	0.011	0.009			Fervidobacteriaceae	11	0.914	1	ns
Catenulisporaceae	0.011	0.011			Gemmataceae	13	0.914	1	ns
Euzebyaceae	0.011	0.012			Hafniaceae	11	0.914	1	ns
Mangrovivirgaceae	0.011	0.01			Haloarculaceae	13	0.914	1	ns
Zymomonadaceae	0.01	0.009			Haloferacaceae	11	0.914	1	ns
Thermosediminibacteraceae	0.01	0.01			Halothiobacillaceae	11	0.914	1	ns
Caldisphaeraceae	0.01	0.006			Hydrogenophilaceae	13	0.914	1	ns
Ignavibacteriaceae	0.01	0.009			Iamiaceae	13	0.914	1	ns
Anaerohalosphaeraceae	0.01	0.011			Isosphaeraceae	11	0.914	1	ns
Elusimicrobiaceae	0.01	0.01			Kaistiaceae	11	0.914	1	ns
Candidatus_Saccharimonadaceae	0.01	0.008			Limnochordaceae	11	0.914	1	ns
Mariprofundaceae	0.01	0.009			Marinilabiliaceae	11	0.914	1	ns
Coleofasciculaceae	0.009	0.01			Marinobacteraceae	11	0.914	1	ns
Natranaerofabaceae	0.009	0.009			Methylophilaceae	13	0.914	1	ns
Hahellaceae	0.009	0.01			Nanobdellaceae	11	0.914	1	ns
Kangiellaceae	0.009	0.01			Natranaerofabaceae	11	0.914	1	ns
Thermincolaceae	0.009	0.009			Nautiliaceae	13	0.914	1	ns
Emcibacteraceae	0.009	0.009			Neisseriaceae	13	0.914	1	ns
Desulfotomaculaceae	0.009	0.008			Nitrobacteraceae	13	0.914	1	ns
Amorphaceae	0.009	0.009			Nocardiaceae	13	0.914	1	ns
Proteinivoraceae	0.009	0.009			Orbaceae	13	0.914	1	ns
Natranaerobiaceae	0.009	0.009			Parvicellaceae	13	0.914	1	ns
Egicoccaceae	0.009	0.009			Parvularculaceae	11	0.914	1	ns
Sanguibacteraceae	0.009	0.011			Peptostreptococcaceae	13	0.914	1	ns
Stellaceae	0.009	0.01			Petrotogaceae	13	0.914	1	ns
Actinopolymorphaceae	0.009	0.008			Phreatobacteraceae	11	0.914	1	ns
Immundisolibacteraceae	0.009	0.009			Planctomycetaceae	13	0.914	1	ns
Methanotrichaceae	0.009	0.01			Pleomorphomonadaceae	13	0.914	1	ns
Candidatus_Babeliaceae	0.008	0.006			Prevotellaceae	11	0.914	1	ns
Trueperaceae	0.008	0.009			Prochlorococcaceae	13	0.914	1	ns
Thermodesulfovibrionaceae	0.008	0.007			Prolixibacteraceae	13	0.914	1	ns
Jatrophihabitantaceae	0.008	0.008			Ruaniaceae	11	0.914	1	ns
Desulfohalobiaceae	0.008	0.008			Silvanigrellaceae	11	0.914	1	ns
Halothiobacillaceae	0.008	0.008			Sphaerobacteraceae	13	0.914	1	ns
Ilumatobacteraceae	0.008	0.009			Sphingosinicellaceae	13	0.914	1	ns
Methanocellaceae	0.008	0.01			Spiroplasmataceae	11	0.914	1	ns
Thioalkalispiraceae	0.008	0.009			Spirosomaceae	13	0.914	1	ns
Psychromonadaceae	0.008	0.007			Staphylococcaceae	13	0.914	1	ns
Sporolactobacillaceae	0.008	0.008			Stellaceae	13	0.914	1	ns
Thalassobaculaceae	0.008	0.007			Sterolibacteriaceae	13	0.914	1	ns
Zhaonellaceae	0.008	0.007			Streptococcaceae	13	0.914	1	ns
Candidatus_Absconditicoccaceae	0.008	0.007			Streptomycetaceae	11	0.914	1	ns
Candidatus_Brocadiaceae	0.008	0.007			Sulfolobaceae	13	0.914	1	ns
Merismopediaceae	0.008	0.008			Synergistaceae	11	0.914	1	ns
Kytococcaceae	0.008	0.008			Tannerellaceae	11	0.914	1	ns
Parvularculaceae	0.008	0.008			Tenuifilaceae	11	0.914	1	ns
Calditerrivibrionaceae	0.008	0.007			Thermaceae	11	0.914	1	ns
Thermosynechococcaceae	0.008	0.008			Thermoanaerobacterales_Family_IV__Incertae_Sedis	11	0.914	1	ns
Kordiimonadaceae	0.008	0.008			Thermotomaculaceae	11	0.914	1	ns
Pseudanabaenaceae	0.008	0.007			Thioalkalispiraceae	11	0.914	1	ns
Kaistiaceae	0.008	0.007			Tissierellaceae	13	0.914	1	ns
Calditrichaceae	0.007	0.009			Trueperaceae	11	0.914	1	ns
Thermoproteaceae	0.007	0.007			Tsukamurellaceae	11	0.914	1	ns
Chamaesiphonaceae	0.007	0.007			Turicibacteraceae	13	0.914	1	ns
Acaryochloridaceae	0.007	0.007			Veillonellaceae	11	0.914	1	ns
Granulosicoccaceae	0.007	0.008			Verrucomicrobiaceae	13	0.914	1	ns
Lichenihabitantaceae	0.007	0.007			Zymomonadaceae	13	0.914	1	ns
Thermomicrobiaceae	0.007	0.008			Acetobacteraceae	12	1	1	ns
Melioribacteraceae	0.007	0.006			Acidobacteriaceae	12	1	1	ns
Hydrogenimonaceae	0.007	0.007			Acidothermaceae	12	1	1	ns
Chloroflexaceae	0.007	0.007			Actinopolysporaceae	12	1	1	ns
Egibacteraceae	0.007	0.007			Akkermansiaceae	12	1	1	ns
Salinisphaeraceae	0.007	0.006			Atopobiaceae	12	1	1	ns
Methylacidiphilaceae	0.007	0.006			Bacillaceae	12	1	1	ns
Ichthyobacteriaceae	0.007	0.006			Candidatus_Uabimicrobiaceae	12	1	1	ns
Rhabdochlamydiaceae	0.007	0.004			Carnobacteriaceae	12	1	1	ns
Thermoguttaceae	0.006	0.006			Cellulomonadaceae	12	1	1	ns
Elioraeaceae	0.006	0.007			Chitinophagaceae	12	1	1	ns
Desulfurococcaceae	0.006	0.005			Christensenellaceae	12	1	1	ns
Kineosporiaceae	0.006	0.007			Clostridiales_Family_XVII__Incertae_Sedis	12	1	1	ns
Zooshikellaceae	0.006	0.005			Colwelliaceae	12	1	1	ns
Archaeoglobaceae	0.006	0.006			Cyclobacteriaceae	12	1	1	ns
Ktedonosporobacteraceae	0.006	0.006			Deinococcaceae	12	1	1	ns
Thioalkalibacteraceae	0.006	0.006			Dietziaceae	12	1	1	ns
Methanospirillaceae	0.006	0.006			Egibacteraceae	12	1	1	ns
Casimicrobiaceae	0.006	0.006			Erythrobacteraceae	12	1	1	ns
Oculatellaceae	0.006	0.005			Geobacteraceae	12	1	1	ns
Breoghaniaceae	0.006	0.006			Halieaceae	12	1	1	ns
Parvicellaceae	0.006	0.005			Halobacteriovoraceae	12	1	1	ns
Cohaesibacteraceae	0.006	0.005			Ignavibacteriaceae	12	1	1	ns
Nanobdellaceae	0.006	0.005			Jatrophihabitantaceae	12	1	1	ns
Pleomorphomonadaceae	0.006	0.006			Labilitrichaceae	12	1	1	ns
Chthonomonadaceae	0.005	0.006			Mangrovivirgaceae	12	1	1	ns
Thermotomaculaceae	0.005	0.005			Methanobacteriaceae	12	1	1	ns
Phototrophicaceae	0.005	0.005			Methanotrichaceae	12	1	1	ns
Gomontiellaceae	0.005	0.005			Methylacidiphilaceae	12	1	1	ns
Dissulfurispiraceae	0.005	0.003			Microcystaceae	12	1	1	ns
Ferroplasmaceae	0.005	0.004			Nocardiopsaceae	12	1	1	ns
Prochlorotrichaceae	0.005	0.004			Pelagibacteraceae	12	1	1	ns
Actinopolysporaceae	0.005	0.005			Phyllobacteriaceae	12	1	1	ns
Sporichthyaceae	0.005	0.004			Pirellulaceae	12	1	1	ns
Candidatus_Deianiraeaceae	0.005	0.004			Pseudonocardiaceae	12	1	1	ns
Acidothermaceae	0.004	0.004			Rhizobiaceae	12	1	1	ns
Bacteriovoracaceae	0.004	0.005			Rhodocyclaceae	12	1	1	ns
Methanocorpusculaceae	0.004	0.005			Roseobacteraceae	12	1	1	ns
Terasakiellaceae	0.004	0.004			Saccharospirillaceae	12	1	1	ns
Candidatus_Midichloriaceae	0.004	0.004			Sinobacteraceae	12	1	1	ns
Candidatus_Desulfofervidaceae	0.004	0.004			Sphingobacteriaceae	12	1	1	ns
Hydrogenophilaceae	0.004	0.003			Tepidiformaceae	12	1	1	ns
Candidatus_Chromulinivoraceae	0.004	0.003			Thermohalobacteraceae	12	1	1	ns
Picrophilaceae	0.004	0.003			Thermoproteaceae	12	1	1	ns
Oleiphilaceae	0.003	0.003			Thermosediminibacteraceae	12	1	1	ns
Fluviibacteraceae	0.003	0.004			Usitatibacteraceae	12	1	1	ns
					Xanthobacteraceae	12	1	1	ns

## Sheet: Genus
Genus	Buffalo	Cattle			Wilcox Test
Prevotella	23.126	23.569			Genus	statistic	p	p.adj	p.adj.signif	Buffalo	Cattle
Fibrobacter	5.013	5.319			Aggregatibacter	24	0.00952	1	ns	0.019	0.015
Methanobrevibacter	2.987	3.065			Alloactinosynnema	24	0.00952	1	ns	0.007	0.005
Clostridium	2.352	3.617			Filimonas	24	0.00952	1	ns	0.009	0.008
Bacteroides	2.036	2.132			Halopenitus	0	0.00952	1	ns	0.001	0.002
Alistipes	1.406	1.552			Hydrogenovibrio	24	0.00952	1	ns	0.008	0.006
Streptomyces	1.378	1.401			Methylophaga	24	0.00952	1	ns
Faecalibacterium	1.177	1.134			Oceanicoccus	24	0.00952	1	ns
Pseudomonas	1.117	1.059			Poriferisphaera	24	0.00952	1	ns
Paenibacillus	1.022	1.016			Pseudohongiella	0	0.00952	1	ns
Butyrivibrio	0.994	0.895			Psychrosphaera	24	0.00952	1	ns
Dysosmobacter	0.949	0.665			Rodentibacter	24	0.00952	1	ns
Ruminococcus	0.939	1.066			Simiduia	24	0.00952	1	ns
Hymenobacter	0.833	0.902			Tatumella	24	0.00952	1	ns
Bacillus	0.703	0.721			Agrococcus	1	0.019	1	ns	0.023	0.028
Flavobacterium	0.607	0.569			Brachybacterium	1	0.019	1	ns	0.064	0.071
Vescimonas	0.6	0.493			Candidatus_Methanoplasma	1	0.019	1	ns	0.011	0.017
Staphylococcus	0.516	0.471			Dissulfurispira	23	0.019	1	ns
Corynebacterium	0.488	0.499			Peptoclostridium	23	0.019	1	ns
Blautia	0.459	0.444			Pseudobutyrivibrio	23	0.019	1	ns	0.411	0.293
Flavonifractor	0.457	0.377			Shewanella	23	0.019	1	ns	0.211	0.173
Streptococcus	0.447	0.428			Spartinivicinus	23	0.019	1	ns
Chryseobacterium	0.432	0.407			Alteromonas	22	0.0381	1	ns
Pseudobutyrivibrio	0.411	0.293			Avibacterium	22	0.0381	1	ns
Parabacteroides	0.409	0.429			Brevirhabdus	2	0.0381	1	ns
Sodaliphilus	0.399	0.437			Candidatus_Azoamicus	22	0.0381	1	ns
Selenomonas	0.388	0.336			Conchiformibius	22	0.0381	1	ns
Xanthomonas	0.379	0.25			Euhalothece	22	0.0381	1	ns
Campylobacter	0.372	0.33			Fannyhessea	2	0.0381	1	ns
Phocaeicola	0.368	0.384			Histophilus	22	0.0381	1	ns
Acinetobacter	0.353	0.335			Labrenzia	22	0.0381	1	ns
Fusobacterium	0.351	0.314			Luteipulveratus	2	0.0381	1	ns
Porphyromonas	0.351	0.391			Maricaulis	22	0.0381	1	ns
Bifidobacterium	0.344	0.359			Methylobacterium	2	0.0381	1	ns	0.113	0.138
Treponema	0.341	0.282			Methylomusa	22	0.0381	1	ns
Lachnoclostridium	0.314	0.311			Occultella	2	0.0381	1	ns
Bradyrhizobium	0.312	0.312			Olivibacter	22	0.0381	1	ns
Flintibacter	0.3	0.262			Periweissella	22	0.0381	1	ns
Vibrio	0.299	0.268			Phytobacter	22	0.0381	1	ns
Mycoplasma	0.299	0.265			Pimelobacter	2	0.0381	1	ns
Nostoc	0.298	0.222			Salarchaeum	22	0.0381	1	ns
Pseudoprevotella	0.296	0.311			Saliphagus	2	0.0381	1	ns
Oscillibacter	0.286	0.223			Acutalibacter	21	0.0667	1	ns
Aeromonas	0.276	0.22			Caldithrix	3	0.0667	1	ns
Microbacterium	0.275	0.301			Candidatus_Cyclonatronum	21	0.0667	1	ns
Spiroplasma	0.266	0.238			Candidatus_Nitrosotenuis	21	0.0667	1	ns
Rhizobium	0.26	0.251			Candidatus_Rhabdochlamydia	21	0.0667	1	ns
Muribaculum	0.259	0.283			Chondrocystis	3	0.0667	1	ns
Duncaniella	0.247	0.264			Curtobacterium	3	0.0667	1	ns
Christensenella	0.238	0.242			Euzebyella	3	0.0667	1	ns
Lactobacillus	0.232	0.228			Faecalicatena	21	0.0667	1	ns
Sphingomonas	0.227	0.251			Gryllotalpicola	3	0.0667	1	ns
Roseburia	0.224	0.213			Haemophilus	21	0.0667	1	ns
Polaribacter	0.223	0.2			Mesobacillus	21	0.0667	1	ns
Tannerella	0.22	0.236			Methylotuvimicrobium	21	0.0667	1	ns
Nocardioides	0.22	0.23			Microbacterium	3	0.0667	1	ns
Enterococcus	0.215	0.187			Pantoea	21	0.0667	1	ns
Shewanella	0.211	0.173			Paradesulfovibrio_(ex_Waite_et_al__2020)	3	0.0667	1	ns
Mucilaginibacter	0.211	0.22			Polynucleobacter	21	0.0667	1	ns
Pusillibacter	0.206	0.13			Pyxidicoccus	21	0.0667	1	ns
Intestinimonas	0.205	0.177			Rhodoluna	21	0.0667	1	ns
Succinivibrio	0.203	0.181			Sagittula	21	0.0667	1	ns
Desulfovibrio	0.202	0.212			Sanguibacter	3	0.0667	1	ns
Mesorhizobium	0.2	0.202			Sideroxydans	21	0.0667	1	ns
Burkholderia	0.199	0.197			Simplicispira	21	0.0667	1	ns
Mycolicibacterium	0.199	0.209			Thaumasiovibrio	21	0.0667	1	ns
Coprococcus	0.199	0.194			Thermodesulfovibrio	21	0.0667	1	ns
Olsenella	0.196	0.197			Xanthomonas	21	0.0667	1	ns
Sphingobacterium	0.195	0.199			Yimella	3	0.0667	1	ns
Calothrix	0.194	0.145			Acidihalobacter	20	0.114	1	ns
Mycobacterium	0.193	0.201			Actinopolymorpha	20	0.114	1	ns
Deinococcus	0.189	0.192			Aegicerativicinus	20	0.114	1	ns
Arthrobacter	0.188	0.196			Aeromonas	20	0.114	1	ns
Stutzerimonas	0.182	0.06			Alysiella	4	0.114	1	ns
Halomonas	0.18	0.183			Anabaena	20	0.114	1	ns
Mycoplasmopsis	0.18	0.166			Aneurinibacillus	20	0.114	1	ns
Barnesiella	0.174	0.189			Arsenicicoccus	20	0.114	1	ns
Blattabacterium	0.169	0.159			Beijerinckia	4	0.114	1	ns
Ruthenibacterium	0.169	0.168			Caldanaerobacter	20	0.114	1	ns
Acutalibacter	0.168	0.151			Calditerrivibrio	20	0.114	1	ns
Eubacterium	0.167	0.161			Calycomorphotria	4	0.114	1	ns
Chitinophaga	0.165	0.174			Candidatus_Nitrosotalea	20	0.114	1	ns
Buchnera	0.162	0.147			Candidatus_Saccharimonas	20	0.114	1	ns
Synechococcus	0.162	0.161			Cereibacter	20	0.114	1	ns
Lysobacter	0.16	0.151			Chitinimonas	20	0.114	1	ns
Spirosoma	0.16	0.167			Citricoccus	4	0.114	1	ns
Actinomyces	0.159	0.156			Cloacibacterium	20	0.114	1	ns
Capnocytophaga	0.159	0.152			Cnuibacter	4	0.114	1	ns
Eggerthella	0.155	0.164			Cohaesibacter	20	0.114	1	ns
Collinsella	0.153	0.156			Corynebacterium	4	0.114	1	ns
Paraprevotella	0.151	0.156			Cycloclasticus	20	0.114	1	ns
Rhodococcus	0.149	0.154			Dehalococcoides	20	0.114	1	ns
Pedobacter	0.144	0.142			Endozoicomonas	20	0.114	1	ns
Pontibacter	0.143	0.154			Enterobacter	20	0.114	1	ns
Clostridioides	0.141	0.127			Erwinia	20	0.114	1	ns
Amycolatopsis	0.14	0.148			Evansella	20	0.114	1	ns
Aliarcobacter	0.139	0.124			Fischerella	20	0.114	1	ns
Micromonospora	0.137	0.135			Flintibacter	20	0.114	1	ns
Simiaoa	0.137	0.139			Geobacillus	20	0.114	1	ns
Pseudoalteromonas	0.129	0.116			Halobiforma	4	0.114	1	ns
Arcobacter	0.129	0.115			Halovivax	20	0.114	1	ns
Pseudodesulfovibrio	0.128	0.134			Heliorestis	20	0.114	1	ns
Cupriavidus	0.127	0.127			Idiomarina	20	0.114	1	ns
Brachyspira	0.127	0.114			Ignavigranum	4	0.114	1	ns
Enterobacter	0.125	0.116			Kovacikia	4	0.114	1	ns
Serratia	0.124	0.119			Kutzneria	20	0.114	1	ns
Caproicibacterium	0.123	0.11			Limnobacter	20	0.114	1	ns
Paraburkholderia	0.123	0.121			Limnospira	20	0.114	1	ns
Nocardia	0.123	0.124			Lysobacter	20	0.114	1	ns
Slackia	0.122	0.129			Megalodesulfovibrio	4	0.114	1	ns
Neisseria	0.121	0.113			Meiothermus	4	0.114	1	ns
Klebsiella	0.121	0.112			Mixta	20	0.114	1	ns
Anaerostipes	0.119	0.111			Monoglobus	20	0.114	1	ns
Megasphaera	0.119	0.124			Oceanispirochaeta	20	0.114	1	ns
Leptotrichia	0.116	0.1			Oxalobacter	20	0.114	1	ns
Stenotrophomonas	0.115	0.118			Paenarthrobacter	4	0.114	1	ns
Methylobacterium	0.113	0.138			Pajaroellobacter	20	0.114	1	ns
Massilia	0.111	0.117			Paludibaculum	4	0.114	1	ns
Brevibacillus	0.111	0.11			Paraneptunicella	20	0.114	1	ns
Comamonas	0.109	0.078			Paraoerskovia	20	0.114	1	ns
Paracoccus	0.108	0.12			Pararhodospirillum	4	0.114	1	ns
Anaerocolumna	0.107	0.101			Parasphingopyxis	4	0.114	1	ns
Lysinibacillus	0.105	0.1			Pontivivens	4	0.114	1	ns
Anaerotruncus	0.103	0.094			Propioniciclava	4	0.114	1	ns
Azospirillum	0.103	0.1			Pseudanabaena	20	0.114	1	ns
Variovorax	0.102	0.103			Pusillibacter	20	0.114	1	ns
Lactococcus	0.102	0.102			Raoultella	20	0.114	1	ns
Enterocloster	0.101	0.101			Rheinheimera	20	0.114	1	ns
Geobacter	0.1	0.105			Salicibibacter	20	0.114	1	ns
Acidaminococcus	0.099	0.1			Serpentinimonas	20	0.114	1	ns
Legionella	0.099	0.088			Sphaerotilus	4	0.114	1	ns
Ethanoligenens	0.098	0.087			Stackebrandtia	20	0.114	1	ns
Phascolarctobacterium	0.098	0.102			Symmachiella	4	0.114	1	ns
Achromobacter	0.097	0.095			Thalassospira	20	0.114	1	ns
Adlercreutzia	0.097	0.099			Thermobaculum	4	0.114	1	ns
Akkermansia	0.097	0.094			Zhaonella	20	0.114	1	ns
Brevundimonas	0.096	0.102			Acetobacterium	19	0.171	1	ns
Anaeromyxobacter	0.096	0.099			Aeribacillus	19	0.171	1	ns
Mediterraneibacter	0.095	0.091			Alkalimarinus	5	0.171	1	ns
Francisella	0.095	0.084			Allobranchiibius	5	0.171	1	ns
Parolsenella	0.095	0.099			Aminobacter	19	0.171	1	ns
Pantoea	0.095	0.09			Arachidicoccus	19	0.171	1	ns
Helicobacter	0.093	0.082			Archaeoglobus	5	0.171	1	ns
Massilistercora	0.093	0.094			Bdellovibrio	19	0.171	1	ns
Cellulomonas	0.092	0.096			Caloramator	19	0.171	1	ns
Agrobacterium	0.092	0.091			Calothrix	19	0.171	1	ns
Malaciobacter	0.092	0.081			Candidatus_Annandia	5	0.171	1	ns
Sphingobium	0.091	0.099			Candidatus_Methanomethylophilus	5	0.171	1	ns
Bordetella	0.089	0.091			Candidatus_Nanopelagicus	19	0.171	1	ns
Caproiciproducens	0.089	0.082			Candidatus_Promineofilum	5	0.171	1	ns
Gordonia	0.088	0.091			Candidatus_Puniceispirillum	19	0.171	1	ns
Acidovorax	0.087	0.073			Castellaniella	19	0.171	1	ns
Lacrimispora	0.087	0.085			Chlamydia	19	0.171	1	ns
Geomonas	0.086	0.087			Chondromyces	19	0.171	1	ns
Parafannyhessea	0.083	0.084			Cruoricaptor	5	0.171	1	ns
Methanosphaera	0.083	0.079			Cyanobacterium	19	0.171	1	ns
Acetivibrio	0.082	0.086			Cylindrospermum	19	0.171	1	ns
Solibaculum	0.082	0.075			Desulfococcus	5	0.171	1	ns
Gordonibacter	0.081	0.087			Dickeya	19	0.171	1	ns
Caulobacter	0.081	0.088			Draconibacterium	5	0.171	1	ns
Erwinia	0.081	0.069			Dysosmobacter	19	0.171	1	ns
Priestia	0.08	0.073			Emergencia	19	0.171	1	ns
Citrobacter	0.08	0.078			Faecalibacter	19	0.171	1	ns
Hungatella	0.08	0.076			Flaviflexus	5	0.171	1	ns
Vagococcus	0.08	0.073			Flavonifractor	19	0.171	1	ns
Actinoplanes	0.077	0.079			Fluoribacter	5	0.171	1	ns
Metamycoplasma	0.076	0.065			Frederiksenia	19	0.171	1	ns
Marinobacter	0.075	0.08			Fulvivirga	19	0.171	1	ns
Anaerobutyricum	0.075	0.071			Glaciihabitans	5	0.171	1	ns
Gemella	0.075	0.07			Halorientalis	5	0.171	1	ns
Tenacibaculum	0.075	0.068			Jeotgalicoccus	5	0.171	1	ns
Proteus	0.075	0.068			Kocuria	5	0.171	1	ns
Romboutsia	0.074	0.067			Kosmotoga	19	0.171	1	ns
Providencia	0.074	0.064			Leadbettera	5	0.171	1	ns
Butyricimonas	0.073	0.085			Lelliottia	19	0.171	1	ns
Sulfurimonas	0.073	0.065			Limnohabitans	5	0.171	1	ns
Muricauda	0.073	0.073			Marinobacterium	19	0.171	1	ns
Fischerella	0.072	0.046			Maritalea	5	0.171	1	ns
Sorangium	0.072	0.073			Methanomassiliicoccus	5	0.171	1	ns
Aminipila	0.072	0.072			Methylobacillus	5	0.171	1	ns
Crassaminicella	0.071	0.062			Methylocystis	19	0.171	1	ns
Listeria	0.071	0.062			Methylovulum	5	0.171	1	ns
Dyadobacter	0.071	0.074			Nostoc	19	0.171	1	ns
Planococcus	0.071	0.064			Oceanimonas	19	0.171	1	ns
Borrelia	0.07	0.067			Oecophyllibacter	19	0.171	1	ns
Escherichia	0.07	0.064			Orientia	19	0.171	1	ns
Winogradskyella	0.07	0.061			Otariodibacter	19	0.171	1	ns
Desulfuromonas	0.07	0.075			Paracoccus	5	0.171	1	ns
Brevibacterium	0.069	0.071			Paraglaciecola	19	0.171	1	ns
Mammaliicoccus	0.069	0.065			Parashewanella	19	0.171	1	ns
Erysipelatoclostridium	0.069	0.06			Pontibrevibacter	19	0.171	1	ns
Tessaracoccus	0.069	0.078			Pseudorhodoplanes	19	0.171	1	ns
Petrimonas	0.068	0.074			Qipengyuania	5	0.171	1	ns
Pyramidobacter	0.068	0.071			Roseivivax	19	0.171	1	ns
Proteiniphilum	0.068	0.071			Roseococcus	19	0.171	1	ns
Emergencia	0.067	0.066			Salimicrobium	19	0.171	1	ns
Dorea	0.067	0.062			Salinisphaera	19	0.171	1	ns
Macrococcus	0.067	0.059			Salinivirga	5	0.171	1	ns
Caproicibacter	0.067	0.062			Sideroxyarcus	5	0.171	1	ns
Companilactobacillus	0.066	0.068			Sphaerospermopsis	19	0.171	1	ns
Wansuia	0.066	0.067			Symbiopectobacterium	19	0.171	1	ns
Devosia	0.066	0.064			Synechocystis	19	0.171	1	ns
Virgibacillus	0.065	0.063			Tateyamaria	5	0.171	1	ns
Elizabethkingia	0.065	0.06			Terrihabitans	19	0.171	1	ns
Brachybacterium	0.064	0.071			Treponema	19	0.171	1	ns
Rickettsia	0.064	0.06			Trichormus	19	0.171	1	ns
Microbulbifer	0.063	0.065			Vibrio	19	0.171	1	ns
Pseudonocardia	0.062	0.062			Yoonia	19	0.171	1	ns
Roseomonas	0.062	0.061			Acetivibrio	6	0.257	1	ns
Lachnospira	0.062	0.058			Actinobacillus	18	0.257	1	ns
Qiania	0.061	0.065			Aeoliella	6	0.257	1	ns
Thermaerobacter	0.061	0.062			Allosaccharopolyspora	6	0.257	1	ns
Weissella	0.061	0.052			Aminomonas	6	0.257	1	ns
Polynucleobacter	0.061	0.056			Anaerohalosphaera	6	0.257	1	ns
Peribacillus	0.061	0.053			Anaerotruncus	18	0.257	1	ns
Sphingopyxis	0.06	0.064			Aquisalimonas	18	0.257	1	ns
Leptospira	0.06	0.056			Aquitalea	6	0.257	1	ns
Chromobacterium	0.06	0.062			Athalassotoga	6	0.257	1	ns
Hydrogenophaga	0.06	0.057			Austwickia	6	0.257	1	ns
Bartonella	0.06	0.05			Beggiatoa	18	0.257	1	ns
Flammeovirga	0.06	0.053			Bibersteinia	18	0.257	1	ns
Myroides	0.059	0.054			Bremerella	18	0.257	1	ns
Caldicellulosiruptor	0.059	0.049			Butyricimonas	6	0.257	1	ns
Cohnella	0.059	0.056			Caldibacillus	18	0.257	1	ns
Gramella	0.058	0.051			Caldilinea	18	0.257	1	ns
Methanosarcina	0.058	0.072			Candidatus_Cardinium	18	0.257	1	ns
Mesoplasma	0.058	0.05			Candidatus_Desulforudis	18	0.257	1	ns
Berryella	0.058	0.059			Candidatus_Kuenenia	18	0.257	1	ns
Desulfosarcina	0.057	0.058			Candidatus_Reidiella	6	0.257	1	ns
Rubrobacter	0.057	0.055			Caproiciproducens	18	0.257	1	ns
Thermoanaerobacterium	0.057	0.05			Celerinatantimonas	18	0.257	1	ns
Yersinia	0.056	0.049			Cellulosimicrobium	6	0.257	1	ns
Prochlorococcus	0.056	0.056			Clostridium	6	0.257	1	ns
Schaalia	0.055	0.056			Comamonas	18	0.257	1	ns
Rufibacter	0.055	0.06			Crassaminicella	18	0.257	1	ns
Mogibacterium	0.055	0.06			Crinalium	6	0.257	1	ns
Erysipelothrix	0.055	0.055			Dermabacter	6	0.257	1	ns
Ligilactobacillus	0.055	0.052			Endomicrobium	18	0.257	1	ns
Echinicola	0.055	0.057			Enterococcus	18	0.257	1	ns
Novosphingobium	0.055	0.06			Ethanoligenens	18	0.257	1	ns
Arabiibacter	0.054	0.056			Falsihalocynthiibacter	18	0.257	1	ns
Sphaerochaeta	0.054	0.055			Ferribacterium	18	0.257	1	ns
Mesomycoplasma	0.053	0.052			Ferrovibrio	6	0.257	1	ns
Pectobacterium	0.053	0.049			Fimbriimonas	18	0.257	1	ns
Mannheimia	0.052	0.032			Flavihumibacter	6	0.257	1	ns
Paeniclostridium	0.052	0.048			Flocculibacter	18	0.257	1	ns
Sporosarcina	0.052	0.048			Gemmatimonas	6	0.257	1	ns
Tenuifilum	0.051	0.055			Gloeobacter	18	0.257	1	ns
Haemophilus	0.051	0.041			Haematospirillum	6	0.257	1	ns
Photobacterium	0.051	0.05			Halomicronema	18	0.257	1	ns
Raoultibacter	0.051	0.056			Heliomicrobium	18	0.257	1	ns
Kaistella	0.051	0.045			Herbinix	18	0.257	1	ns
Thermophilibacter	0.051	0.051			Humibacter	6	0.257	1	ns
Dickeya	0.051	0.048			Hydrogenophaga	18	0.257	1	ns
Thermus	0.051	0.047			Hyphobacterium	18	0.257	1	ns
Rhodoferax	0.05	0.048			Iamia	6	0.257	1	ns
Actinomadura	0.05	0.051			Intestinimonas	18	0.257	1	ns
Pandoraea	0.05	0.047			Klebsiella	18	0.257	1	ns
Denitrobacterium	0.05	0.056			Kytococcus	6	0.257	1	ns
Leucobacter	0.049	0.052			Labilibaculum	18	0.257	1	ns
Cellulophaga	0.049	0.048			Lacibacter	18	0.257	1	ns
Nocardiopsis	0.048	0.053			Lacimicrobium	18	0.257	1	ns
Candidatus_Pelagibacter	0.048	0.043			Lautropia	6	0.257	1	ns
Geobacillus	0.048	0.043			Lederbergia	18	0.257	1	ns
Moorella	0.048	0.044			Leeuwenhoekiella	18	0.257	1	ns
Limosilactobacillus	0.048	0.047			Lentibacillus	18	0.257	1	ns
Nonlabens	0.048	0.048			Lentilactobacillus	18	0.257	1	ns
Janthinobacterium	0.048	0.049			Marinagarivorans	18	0.257	1	ns
Sulfitobacter	0.048	0.048			Mariprofundus	18	0.257	1	ns
Agromyces	0.048	0.047			Marivirga	18	0.257	1	ns
Wolbachia	0.048	0.042			Methanopyrus	6	0.257	1	ns
Erythrobacter	0.047	0.046			Methanosalsum	18	0.257	1	ns
Bosea	0.047	0.05			Methylibium	6	0.257	1	ns
Alicyclobacillus	0.047	0.047			Methylotenera	6	0.257	1	ns
Cytobacillus	0.047	0.043			Mucilaginibacter	6	0.257	1	ns
Arachidicoccus	0.047	0.045			Muricauda	6	0.257	1	ns
Aquimarina	0.047	0.046			Mycoavidus	18	0.257	1	ns
Vallitalea	0.046	0.043			Natronosporangium	18	0.257	1	ns
Saccharopolyspora	0.046	0.051			Ndongobacter	18	0.257	1	ns
Candidatus_Blochmannia	0.046	0.039			Neomicrococcus	6	0.257	1	ns
Exiguobacterium	0.046	0.043			Neorickettsia	18	0.257	1	ns
Metabacillus	0.046	0.045			Neotabrizicola	18	0.257	1	ns
Candidatus_Methanomethylophilus	0.046	0.051			Nisaea	18	0.257	1	ns
Nonomuraea	0.045	0.049			Novisyntrophococcus	18	0.257	1	ns
Fretibacterium	0.045	0.044			Oerskovia	18	0.257	1	ns
Alkaliphilus	0.045	0.042			Oleidesulfovibrio	18	0.257	1	ns
Ralstonia	0.045	0.044			Oscillatoria	18	0.257	1	ns
Kocuria	0.045	0.048			Oscillibacter	18	0.257	1	ns
Desulfobulbus	0.045	0.043			Paenisporosarcina	18	0.257	1	ns
Herbaspirillum	0.044	0.045			Parvibaculum	18	0.257	1	ns
Candidatus_Sulfidibacterium	0.044	0.042			Phoenicibacter	18	0.257	1	ns
Allobaculum	0.044	0.048			Pistricoccus	6	0.257	1	ns
Paraclostridium	0.043	0.038			Plantibacter	6	0.257	1	ns
Methanobacterium	0.043	0.039			Polaromonas	18	0.257	1	ns
Solidesulfovibrio	0.043	0.045			Pseudovibrio	18	0.257	1	ns
Anaerococcus	0.043	0.038			Rahnella	6	0.257	1	ns
Anabaena	0.042	0.028			Rhodopseudomonas	6	0.257	1	ns
Luteimonas	0.042	0.043			Rickettsiella	18	0.257	1	ns
Lutibacter	0.042	0.035			Roseibium	18	0.257	1	ns
Salmonella	0.042	0.04			Salinibacter	6	0.257	1	ns
Formosa	0.042	0.04			Scardovia	18	0.257	1	ns
Curtobacterium	0.042	0.05			Schlegelella	6	0.257	1	ns
Opitutus	0.042	0.043			Scytonema	18	0.257	1	ns
Moraxella	0.042	0.038			Sellimonas	6	0.257	1	ns
Sinorhizobium	0.042	0.043			Singulisphaera	18	0.257	1	ns
Pseudoduganella	0.042	0.043			Snodgrassella	18	0.257	1	ns
Ensifer	0.041	0.037			Solibaculum	18	0.257	1	ns
Carnobacterium	0.041	0.038			Spiractinospora	6	0.257	1	ns
Fibrella	0.041	0.041			Spongiibacter	18	0.257	1	ns
Thermoanaerobacter	0.041	0.033			Stappia	18	0.257	1	ns
Sellimonas	0.041	0.04			Stutzerimonas	18	0.257	1	ns
Peptoniphilus	0.041	0.038			Sutterella	18	0.257	1	ns
Ruminiclostridium	0.041	0.037			Syntrophotalea	6	0.257	1	ns
Leuconostoc	0.041	0.036			Tardibacter	18	0.257	1	ns
Geminocystis	0.041	0.039			Tepidanaerobacter	18	0.257	1	ns
Gimesia	0.041	0.041			Thalassobius	18	0.257	1	ns
Alteromonas	0.04	0.034			Thauera	18	0.257	1	ns
Lachnoanaerobaculum	0.04	0.04			Thiomicrospira	18	0.257	1	ns
Paludibacter	0.04	0.049			Thiothrix	6	0.257	1	ns
Symbiobacterium	0.04	0.039			Tolypothrix	18	0.257	1	ns
Methylomonas	0.04	0.037			Vaginimicrobium	6	0.257	1	ns
Runella	0.04	0.039			Verrucosispora	6	0.257	1	ns
Desulfitobacterium	0.04	0.039			Vescimonas	18	0.257	1	ns
Megamonas	0.04	0.034			Vespertiliibacter	18	0.257	1	ns
Oceanobacillus	0.04	0.035			Weizmannia	6	0.257	1	ns
Archangium	0.04	0.042			Yangia	6	0.257	1	ns
Aeromicrobium	0.04	0.04			Yinghuangia	18	0.257	1	ns
Pseudarthrobacter	0.039	0.042			Acidibrevibacterium	17	0.352	1	ns
Acetobacterium	0.039	0.037			Acidiferrobacter	17	0.352	1	ns
Luteibacter	0.039	0.042			Acidisarcina	17	0.352	1	ns
Desulfomicrobium	0.039	0.042			Actinotalea	7	0.352	1	ns
Faecalibacillus	0.039	0.036			Alcaligenes	17	0.352	1	ns
Cloacibacillus	0.039	0.041			Alcanivorax	7	0.352	1	ns
Anoxybacillus	0.039	0.04			Algoriphagus	17	0.352	1	ns
Fulvivirga	0.039	0.038			Alkalihalophilus	17	0.352	1	ns
Myxococcus	0.039	0.041			Alkalilimnicola	7	0.352	1	ns
Rathayibacter	0.039	0.037			Anaerostipes	17	0.352	1	ns
Desulfosporosinus	0.038	0.036			Anaerotignum	17	0.352	1	ns
Turicibacter	0.038	0.036			Anaplasma	17	0.352	1	ns
Verrucomicrobium	0.038	0.038			Aquaspirillum	7	0.352	1	ns
Psychrobacter	0.038	0.034			Aquisediminimonas	17	0.352	1	ns
Niallia	0.038	0.033			Aurantimicrobium	17	0.352	1	ns
Ornithinimicrobium	0.038	0.039			Bacteriovorax	7	0.352	1	ns
Chlorobaculum	0.037	0.04			Boudabousia	17	0.352	1	ns
Candidatus_Phytoplasma	0.037	0.033			Breznakiella	17	0.352	1	ns
Shinella	0.037	0.037			Caldisphaera	17	0.352	1	ns
Caballeronia	0.037	0.038			Candidatus_Cloacimonas	17	0.352	1	ns
Frankia	0.037	0.037			Candidatus_Desulfofervidus	7	0.352	1	ns
Brucella	0.037	0.036			Candidatus_Koribacter	7	0.352	1	ns
Aureimonas	0.036	0.036			Candidatus_Nasuia	17	0.352	1	ns
Pseudoxanthomonas	0.036	0.038			Candidatus_Phycorickettsia	17	0.352	1	ns
Conexibacter	0.036	0.036			Candidatus_Profftia	17	0.352	1	ns
Microvirga	0.036	0.038			Candidatus_Schneideria	17	0.352	1	ns
Wujia	0.036	0.034			Capnocytophaga	17	0.352	1	ns
Rhodopseudomonas	0.036	0.039			Caproicibacter	17	0.352	1	ns
Thauera	0.035	0.033			Caproicibacterium	17	0.352	1	ns
Sphaerospermopsis	0.035	0.028			Carboxydocella	7	0.352	1	ns
Veillonella	0.035	0.035			Citrifermentans	17	0.352	1	ns
Acetobacter	0.035	0.033			Costertonia	17	0.352	1	ns
Luteolibacter	0.035	0.037			Coxiella	17	0.352	1	ns
Pasteurella	0.035	0.03			Croceibacterium	17	0.352	1	ns
Magnetospirillum	0.035	0.037			Dehalobacter	17	0.352	1	ns
Alkalihalobacillus	0.035	0.036			Desulfobacca	7	0.352	1	ns
Rhodothermus	0.035	0.039			Desulfobacter	17	0.352	1	ns
Syntrophotalea	0.035	0.035			Desulfobacula	7	0.352	1	ns
Faecalibaculum	0.035	0.035			Desulfomarina	17	0.352	1	ns
Dehalococcoides	0.035	0.02			Desulforapulum	17	0.352	1	ns
Pseudoclostridium	0.035	0.034			Desulfovibrio	7	0.352	1	ns
Lacinutrix	0.035	0.034			Desulfurobacterium	17	0.352	1	ns
Candidatus_Arthromitus	0.035	0.031			Dongshaea	17	0.352	1	ns
Methanocaldococcus	0.034	0.032			Duganella	17	0.352	1	ns
Novisyntrophococcus	0.034	0.032			Dysgonomonas	17	0.352	1	ns
Cellulosilyticum	0.034	0.031			Eikenella	17	0.352	1	ns
Azoarcus	0.034	0.035			Elusimicrobium	7	0.352	1	ns
Terrisporobacter	0.034	0.034			Escherichia	17	0.352	1	ns
Acidianus	0.034	0.03			Exiguobacterium	17	0.352	1	ns
Corallococcus	0.034	0.033			Ferrimonas	17	0.352	1	ns
Granulicella	0.034	0.035			Fibrobacter	7	0.352	1	ns
Propionibacterium	0.034	0.034			Formosa	17	0.352	1	ns
Maribacter	0.033	0.03			Fuerstiella	17	0.352	1	ns
Borreliella	0.033	0.03			Gemmata	17	0.352	1	ns
Rothia	0.033	0.035			Gephyromycinifex	7	0.352	1	ns
Thermococcus	0.033	0.032			Gilvimarinus	7	0.352	1	ns
Apibacter	0.033	0.03			Gulosibacter	17	0.352	1	ns
Dialister	0.033	0.034			Guyparkeria	7	0.352	1	ns
Faecalicatena	0.033	0.03			Halobacteroides	7	0.352	1	ns
Jeotgalibaca	0.033	0.028			Halobaculum	7	0.352	1	ns
Halarcobacter	0.033	0.028			Halorubrum	17	0.352	1	ns
Mageeibacillus	0.032	0.036			Haloterrigena	17	0.352	1	ns
Methylococcus	0.032	0.032			Hankyongella	7	0.352	1	ns
Planktothrix	0.032	0.029			Hydrocarboniclastica	17	0.352	1	ns
Dehalobacter	0.032	0.03			Hydrogenobacter	7	0.352	1	ns
Algibacter	0.032	0.027			Hyphomonas	7	0.352	1	ns
Actinobacillus	0.032	0.023			Jiangella	17	0.352	1	ns
Heliomicrobium	0.032	0.029			Ketobacter	7	0.352	1	ns
Monoglobus	0.032	0.028			Ketogulonicigenium	7	0.352	1	ns
Finegoldia	0.031	0.029			Kibdelosporangium	7	0.352	1	ns
Qipengyuania	0.031	0.035			Koinonema	17	0.352	1	ns
Odoribacter	0.031	0.032			Lachnoanaerobaculum	17	0.352	1	ns
Chryseolinea	0.031	0.033			Lapidilactobacillus	7	0.352	1	ns
Thioalkalivibrio	0.031	0.032			Leuconostoc	17	0.352	1	ns
Martelella	0.031	0.031			Liquorilactobacillus	17	0.352	1	ns
Thermosipho	0.031	0.027			Loigolactobacillus	7	0.352	1	ns
Desulfonema	0.031	0.03			Mageeibacillus	7	0.352	1	ns
Luteitalea	0.031	0.031			Mannheimia	17	0.352	1	ns
Leifsonia	0.031	0.031			Marinomonas	17	0.352	1	ns
Colwellia	0.031	0.03			Marixanthomonas	7	0.352	1	ns
Algoriphagus	0.031	0.027			Methanocella	7	0.352	1	ns
Aerococcus	0.03	0.03			Methanofollis	7	0.352	1	ns
Ehrlichia	0.03	0.027			Methanosarcina	7	0.352	1	ns
Microlunatus	0.03	0.032			Methanosphaerula	7	0.352	1	ns
Rhodocaloribacter	0.03	0.036			Miltoncostaea	17	0.352	1	ns
Cutibacterium	0.03	0.032			Natronobiforma	7	0.352	1	ns
Kitasatospora	0.03	0.032			Neorhizobium	17	0.352	1	ns
Sandaracinus	0.03	0.028			Nibribacter	7	0.352	1	ns
Lacticaseibacillus	0.03	0.028			Nitratifractor	7	0.352	1	ns
Methanococcus	0.03	0.026			Nitratiruptor	17	0.352	1	ns
Glutamicibacter	0.03	0.029			Nitrosopumilus	17	0.352	1	ns
Planctomyces	0.029	0.03			Nonomuraea	7	0.352	1	ns
Draconibacterium	0.029	0.03			Oceanobacillus	17	0.352	1	ns
Empedobacter	0.029	0.028			Ornithobacterium	7	0.352	1	ns
Tumebacillus	0.029	0.03			Paraburkholderia	17	0.352	1	ns
Dyella	0.029	0.03			Parageobacillus	17	0.352	1	ns
Pediococcus	0.029	0.027			Paroceanicella	7	0.352	1	ns
Trueperella	0.029	0.029			Pelagibacterium	17	0.352	1	ns
Komagataeibacter	0.029	0.031			Petrocella	17	0.352	1	ns
Dictyoglomus	0.028	0.024			Phormidium	7	0.352	1	ns
Herbinix	0.028	0.027			Pontibacillus	17	0.352	1	ns
Diaphorobacter	0.028	0.029			Psychroflexus	17	0.352	1	ns
Methylocystis	0.028	0.026			Pulveribacter	7	0.352	1	ns
Tyzzerella	0.028	0.026			Pyramidobacter	7	0.352	1	ns
Halanaerobium	0.028	0.023			Ralstonia	17	0.352	1	ns
Terriglobus	0.028	0.029			Rhizobacter	7	0.352	1	ns
Dietzia	0.028	0.024			Rhodocaloribacter	7	0.352	1	ns
Thermobacillus	0.028	0.028			Richelia	17	0.352	1	ns
Gemmata	0.028	0.027			Rosistilla	7	0.352	1	ns
Acidipropionibacterium	0.028	0.029			Ruminococcus	7	0.352	1	ns
Citrifermentans	0.028	0.028			Salinicola	17	0.352	1	ns
Desulforamulus	0.028	0.026			Sandaracinus	17	0.352	1	ns
Dysgonomonas	0.028	0.027			Schleiferilactobacillus	7	0.352	1	ns
Atopobium	0.028	0.028			Secundilactobacillus	7	0.352	1	ns
Leclercia	0.028	0.027			Sediminicola	17	0.352	1	ns
Gelria	0.028	0.028			Selenomonas	17	0.352	1	ns
Leptolyngbya	0.028	0.029			Sneathia	17	0.352	1	ns
Azospira	0.028	0.028			Sphingomonas	7	0.352	1	ns
Kiritimatiella	0.028	0.029			Sphingopyxis	7	0.352	1	ns
Prosthecochloris	0.027	0.029			Sporolactobacillus	17	0.352	1	ns
Acidithiobacillus	0.027	0.025			Syntrophobotulus	17	0.352	1	ns
Skermanella	0.027	0.029			Tardiphaga	17	0.352	1	ns
Tolypothrix	0.027	0.021			Tautonia	7	0.352	1	ns
Acholeplasma	0.027	0.025			Thermoactinomyces	7	0.352	1	ns
Halobacillus	0.027	0.025			Thermomonas	7	0.352	1	ns
Sarcina	0.027	0.024			Thermovirga	7	0.352	1	ns
Mycobacteroides	0.027	0.027			Trichlorobacter	17	0.352	1	ns
Nitrosopumilus	0.026	0.022			Tritonibacter	7	0.352	1	ns
Ereboglobus	0.026	0.027			Urechidicola	17	0.352	1	ns
Roseovarius	0.026	0.028			Uruburuella	17	0.352	1	ns
Tissierella	0.026	0.027			Verminephrobacter	17	0.352	1	ns
Parvimonas	0.026	0.024			Viridibacillus	7	0.352	1	ns
Sedimentibacter	0.026	0.022			Vogesella	17	0.352	1	ns
Kosakonia	0.026	0.028			Acidovorax	16	0.476	1	ns
Lentilactobacillus	0.026	0.025			Acuticoccus	16	0.476	1	ns
Tepidibacter	0.026	0.026			Aequorivita	16	0.476	1	ns
Methylorubrum	0.026	0.028			Agarilytica	8	0.476	1	ns
Ureaplasma	0.026	0.023			Agarivorans	16	0.476	1	ns
Saccharomonospora	0.026	0.027			Aminipila	16	0.476	1	ns
Sutterella	0.026	0.026			Amylolactobacillus	16	0.476	1	ns
Marinomonas	0.026	0.024			Anabaenopsis	16	0.476	1	ns
Robiginitalea	0.026	0.03			Arcanobacterium	8	0.476	1	ns
Parageobacillus	0.026	0.022			Archangium	8	0.476	1	ns
Oceanidesulfovibrio	0.025	0.026			Arenibacter	16	0.476	1	ns
Delftia	0.025	0.025			Atribacter	16	0.476	1	ns
Anaerotignum	0.025	0.022			Aureimonas	16	0.476	1	ns
Micrococcus	0.025	0.024			Baekduia	16	0.476	1	ns
Caloramator	0.025	0.022			Bartonella	16	0.476	1	ns
Sulfurospirillum	0.025	0.021			Brenneria	16	0.476	1	ns
Anseongella	0.025	0.028			Brevibacillus	16	0.476	1	ns
Haploplasma	0.025	0.022			Brevibacterium	8	0.476	1	ns
Gilliamella	0.025	0.023			Bulleidia	8	0.476	1	ns
Spirochaeta	0.025	0.026			Caenibius	8	0.476	1	ns
Clavibacter	0.025	0.026			Caldalkalibacillus	8	0.476	1	ns
Xenorhabdus	0.025	0.023			Caldicellulosiruptor	16	0.476	1	ns
Phenylobacterium	0.025	0.023			Candidatus_Gullanella	16	0.476	1	ns
Peptacetobacter	0.024	0.024			Candidatus_Nardonella	16	0.476	1	ns
Thermomonas	0.024	0.025			Candidatus_Nitrosacidococcus	16	0.476	1	ns
Edwardsiella	0.024	0.025			Candidatus_Nitrotoga	16	0.476	1	ns
Aromatoleum	0.024	0.025			Candidatus_Paracaedibacter	16	0.476	1	ns
Thermoclostridium	0.024	0.023			Candidatus_Protochlamydia	16	0.476	1	ns
Alcaligenes	0.024	0.021			Candidatus_Syntrophocurvum	16	0.476	1	ns
Chlamydia	0.024	0.021			Catenulispora	16	0.476	1	ns
Gemmatimonas	0.024	0.026			Caulobacter	8	0.476	1	ns
Fructilactobacillus	0.024	0.023			Chloroflexus	8	0.476	1	ns
Neorhizobium	0.024	0.024			Chthonomonas	8	0.476	1	ns
Tsukamurella	0.024	0.025			Cohnella	16	0.476	1	ns
Levilactobacillus	0.024	0.022			Commensalibacter	16	0.476	1	ns
Adhaeribacter	0.024	0.023			Coprobacter	8	0.476	1	ns
Alkaliflexus	0.023	0.025			Croceibacter	16	0.476	1	ns
Saccharothrix	0.023	0.025			Crocinitomix	8	0.476	1	ns
Geosporobacter	0.023	0.022			Crocosphaera	16	0.476	1	ns
Tannockella	0.023	0.022			Cryptobacterium	8	0.476	1	ns
Flavisolibacter	0.023	0.024			Cytophaga	16	0.476	1	ns
Hathewaya	0.023	0.019			Dechloromonas	8	0.476	1	ns
Sodalis	0.023	0.022			Defluviicoccus	16	0.476	1	ns
Alcanivorax	0.023	0.025			Denitrobacterium	8	0.476	1	ns
Heyndrickxia	0.023	0.019			Desulfohalobium	16	0.476	1	ns
Xanthobacter	0.023	0.02			Desulfomonile	16	0.476	1	ns
Agrococcus	0.023	0.028			Desulfotomaculum	16	0.476	1	ns
Coriobacterium	0.023	0.024			Devriesea	8	0.476	1	ns
Rossellomorea	0.023	0.023			Dinoroseobacter	8	0.476	1	ns
Geotalea	0.023	0.023			Dorea	16	0.476	1	ns
Candidatus_Sulcia	0.023	0.023			Ensifer	16	0.476	1	ns
Salidesulfovibrio	0.023	0.024			Epidermidibacterium	16	0.476	1	ns
Fenollaria	0.022	0.02			Erysipelatoclostridium	16	0.476	1	ns
Marinobacterium	0.022	0.02			Erythrobacter	16	0.476	1	ns
Halopseudomonas	0.022	0.022			Euzebya	8	0.476	1	ns
Georgenia	0.022	0.021			Faecalitalea	16	0.476	1	ns
Raoultella	0.022	0.021			Ferroplasma	16	0.476	1	ns
Candidatus_Promineofilum	0.022	0.025			Filifactor	8	0.476	1	ns
Sulfurovum	0.022	0.022			Flagellimonas	8	0.476	1	ns
Candidatus_Kinetoplastibacterium	0.022	0.02			Fluviicola	16	0.476	1	ns
Rhodanobacter	0.022	0.022			Frankia	16	0.476	1	ns
Coprobacter	0.022	0.022			Gallibacterium	16	0.476	1	ns
Malacoplasma	0.022	0.024			Geitlerinema	8	0.476	1	ns
Morganella	0.022	0.022			Gemmatirosa	8	0.476	1	ns
Lactiplantibacillus	0.022	0.022			Geodermatophilus	8	0.476	1	ns
Aequorivita	0.022	0.021			Georgenia	16	0.476	1	ns
Haliangium	0.022	0.023			Geosporobacter	16	0.476	1	ns
Fastidiosipila	0.022	0.022			Gillisia	16	0.476	1	ns
Streptacidiphilus	0.022	0.023			Glaesserella	16	0.476	1	ns
Rahnella	0.022	0.023			Granulosicoccus	8	0.476	1	ns
Apilactobacillus	0.022	0.021			Hafnia	16	0.476	1	ns
Olivibacter	0.022	0.02			Hahella	8	0.476	1	ns
Tichowtungia	0.022	0.023			Halanaeroarchaeum	16	0.476	1	ns
Streptobacillus	0.022	0.02			Halapricum	16	0.476	1	ns
Tetragenococcus	0.022	0.02			Haliscomenobacter	8	0.476	1	ns
Nitrospira	0.021	0.021			Haloprofundus	16	0.476	1	ns
Tautonia	0.021	0.022			Helicobacter	16	0.476	1	ns
Desulfocurvibacter	0.021	0.022			Herbiconiux	8	0.476	1	ns
Helcococcus	0.021	0.019			Humisphaera	8	0.476	1	ns
Saccharibacillus	0.021	0.023			Hymenobacter	8	0.476	1	ns
Cronobacter	0.021	0.021			Ichthyobacterium	16	0.476	1	ns
Cereibacter	0.021	0.02			Ideonella	16	0.476	1	ns
Endomicrobium	0.021	0.017			Intrasporangium	8	0.476	1	ns
Mesobacillus	0.021	0.018			Janibacter	8	0.476	1	ns
Gloeothece	0.021	0.02			Janthinobacterium	8	0.476	1	ns
Cloacibacterium	0.021	0.016			Jeongeupia	16	0.476	1	ns
Latilactobacillus	0.021	0.017			Jonquetella	16	0.476	1	ns
Flavihumibacter	0.021	0.023			Kaistella	16	0.476	1	ns
Bdellovibrio	0.021	0.02			Kangiella	8	0.476	1	ns
Nakamurella	0.021	0.022			Kluyvera	16	0.476	1	ns
Salegentibacter	0.021	0.017			Kozakia	16	0.476	1	ns
Cryobacterium	0.021	0.021			Kyrpidia	16	0.476	1	ns
Aquihabitans	0.021	0.021			Lactococcus	16	0.476	1	ns
Polaromonas	0.021	0.019			Laribacter	8	0.476	1	ns
Miniphocaeibacter	0.021	0.019			Leptothermofonsia	16	0.476	1	ns
Aquisphaera	0.02	0.022			Lichenihabitans	16	0.476	1	ns
Ruania	0.02	0.021			Litorilituus	16	0.476	1	ns
Poseidonibacter	0.02	0.02			Lutibacter	16	0.476	1	ns
Ancylobacter	0.02	0.02			Magnetococcus	16	0.476	1	ns
Gemmatirosa	0.02	0.021			Mariniblastus	8	0.476	1	ns
Liquorilactobacillus	0.02	0.016			Marinilactibacillus	8	0.476	1	ns
Antarcticibacterium	0.02	0.019			Melioribacter	16	0.476	1	ns
Lacunisphaera	0.02	0.02			Mesotoga	16	0.476	1	ns
Polyangium	0.02	0.02			Methanococcus	16	0.476	1	ns
Collimonas	0.02	0.02			Methanocorpusculum	8	0.476	1	ns
Labilibaculum	0.02	0.02			Methanofervidicoccus	8	0.476	1	ns
Streptosporangium	0.02	0.02			Methanolacinia	8	0.476	1	ns
Photorhabdus	0.02	0.017			Methylocaldum	8	0.476	1	ns
Alteracholeplasma	0.02	0.017			Methyloceanibacter	8	0.476	1	ns
Phreatobacter	0.02	0.021			Methylorubrum	8	0.476	1	ns
Gottschalkia	0.02	0.017			Micrococcus	16	0.476	1	ns
Ruficoccus	0.02	0.02			Micromonospora	16	0.476	1	ns
Desulfarculus	0.02	0.019			Mitsuaria	16	0.476	1	ns
Gloeobacter	0.02	0.019			Moellerella	16	0.476	1	ns
Janibacter	0.02	0.022			Moritella	16	0.476	1	ns
Thiothrix	0.019	0.022			Mucisphaera	8	0.476	1	ns
Cellulosimicrobium	0.019	0.022			Murdochiella	16	0.476	1	ns
Paludibacterium	0.019	0.02			Muribaculum	8	0.476	1	ns
Salinibacter	0.019	0.023			Mycobacteroides	8	0.476	1	ns
Pelosinus	0.019	0.019			Myroides	16	0.476	1	ns
Miltoncostaea	0.019	0.018			Nanchangia	8	0.476	1	ns
Phaeobacter	0.019	0.02			Natronomonas	16	0.476	1	ns
Microcystis	0.019	0.018			Niabella	16	0.476	1	ns
Desulfoluna	0.019	0.019			Nitrogeniibacter	16	0.476	1	ns
Hyphomicrobium	0.019	0.021			Niveibacterium	8	0.476	1	ns
Aggregatibacter	0.019	0.015			Novibacillus	16	0.476	1	ns
Thalassospira	0.019	0.017			Oceanicola	8	0.476	1	ns
Niabella	0.019	0.018			Oceanihabitans	8	0.476	1	ns
Aminomonas	0.019	0.019			Oleiphilus	16	0.476	1	ns
Evansella	0.019	0.015			Oricola	8	0.476	1	ns
Ornithobacterium	0.019	0.019			Owenweeksia	8	0.476	1	ns
Alkalibacter	0.019	0.019			Paludibacterium	8	0.476	1	ns
Altererythrobacter	0.019	0.019			Paralcaligenes	16	0.476	1	ns
Epilithonimonas	0.019	0.018			Parasedimentitalea	8	0.476	1	ns
Arsenophonus	0.019	0.018			Parvimonas	16	0.476	1	ns
Croceicoccus	0.019	0.019			Paucilactobacillus	16	0.476	1	ns
Cetobacterium	0.019	0.017			Pectobacterium	16	0.476	1	ns
Paludibaculum	0.019	0.022			Peteryoungia	16	0.476	1	ns
Solitalea	0.019	0.02			Phnomibacter	8	0.476	1	ns
Gluconobacter	0.019	0.019			Photorhabdus	16	0.476	1	ns
Kutzneria	0.019	0.018			Phycisphaera	8	0.476	1	ns
Ottowia	0.019	0.017			Planococcus	16	0.476	1	ns
Mixta	0.019	0.018			Pleurocapsa	16	0.476	1	ns
Maribellus	0.018	0.017			Pluralibacter	16	0.476	1	ns
Xylanimonas	0.018	0.019			Polymorphobacter	16	0.476	1	ns
Moorena	0.018	0.019			Pontibacter	8	0.476	1	ns
Gracilibacillus	0.018	0.018			Providencia	16	0.476	1	ns
Spiribacter	0.018	0.02			Pseudobacter	8	0.476	1	ns
Olleya	0.018	0.016			Pseudobdellovibrio	16	0.476	1	ns
Pseudocnuella	0.018	0.018			Pseudoclostridium	8	0.476	1	ns
Intestinibaculum	0.018	0.017			Pseudolabrys	8	0.476	1	ns
Tepiditoga	0.018	0.016			Pseudolysobacter	8	0.476	1	ns
Serinicoccus	0.018	0.018			Pseudonocardia	16	0.476	1	ns
Dechloromonas	0.018	0.019			Pseudopuniceibacterium	8	0.476	1	ns
Cellvibrio	0.018	0.019			Pseudorhizobium	16	0.476	1	ns
Jiangella	0.018	0.016			Psychroserpens	16	0.476	1	ns
Murdochiella	0.018	0.017			Rhodocytophaga	16	0.476	1	ns
Brenneria	0.018	0.018			Rhodoferax	16	0.476	1	ns
Salinibacterium	0.018	0.019			Robiginitalea	8	0.476	1	ns
Thiomonas	0.018	0.018			Roseicitreum	16	0.476	1	ns
Caloranaerobacter	0.018	0.017			Runella	16	0.476	1	ns
Marinitoga	0.018	0.016			Salinimonas	16	0.476	1	ns
Haliscomenobacter	0.018	0.021			Salmonella	16	0.476	1	ns
Pectinatus	0.018	0.017			Saprospira	8	0.476	1	ns
Pelodictyon	0.018	0.018			Sediminicoccus	16	0.476	1	ns
Neobacillus	0.018	0.017			Simiaoa	8	0.476	1	ns
Breznakiella	0.018	0.017			Skermania	8	0.476	1	ns
Sutcliffiella	0.018	0.017			Sphingobium	8	0.476	1	ns
Candidatus_Nanosynbacter	0.018	0.015			Spirochaeta	8	0.476	1	ns
Bernardetia	0.018	0.017			Subtercola	8	0.476	1	ns
Hypericibacter	0.018	0.018			Sulfurimicrobium	8	0.476	1	ns
Aquirufa	0.018	0.017			Sulfurimonas	16	0.476	1	ns
Peptoclostridium	0.018	0.016			Sulfurisphaera	16	0.476	1	ns
Serpentinicella	0.018	0.014			Sulfurospirillum	16	0.476	1	ns
Amedibacterium	0.018	0.016			Teredinibacter	16	0.476	1	ns
Rhodocytophaga	0.018	0.017			Tessaracoccus	8	0.476	1	ns
Desulfatibacillum	0.018	0.018			Thalassolituus	16	0.476	1	ns
Jeotgalicoccus	0.018	0.018			Thermanaerosceptrum	16	0.476	1	ns
Limnochorda	0.018	0.017			Thermoanaerobacter	16	0.476	1	ns
Alkalitalea	0.018	0.017			Thermobacillus	16	0.476	1	ns
Cedecea	0.018	0.017			Thermochromatium	8	0.476	1	ns
Megalodesulfovibrio	0.018	0.021			Thermoclostridium	16	0.476	1	ns
Lacipirellula	0.017	0.018			Thermodesulfobacterium	8	0.476	1	ns
Moritella	0.017	0.014			Thermoleptolyngbya	16	0.476	1	ns
Cyanobium	0.017	0.018			Thermomicrobium	8	0.476	1	ns
Labilithrix	0.017	0.018			Thermosulfurimonas	16	0.476	1	ns
Caminibacter	0.017	0.016			Thermotoga	16	0.476	1	ns
Carboxydocella	0.017	0.02			Thiohalobacter	16	0.476	1	ns
Psychrobacillus	0.017	0.015			Tomitella	8	0.476	1	ns
Riemerella	0.017	0.017			Ureaplasma	16	0.476	1	ns
Bibersteinia	0.017	0.009			Vitreoscilla	8	0.476	1	ns
Rhodospirillum	0.017	0.017			Weeksella	8	0.476	1	ns
Mycolicibacter	0.017	0.018			Xanthobacter	16	0.476	1	ns
Hydrogenibacillus	0.017	0.017			Xenorhabdus	16	0.476	1	ns
Leadbettera	0.017	0.018			Xylophilus	16	0.476	1	ns
Saprospira	0.017	0.019			Yersinia	16	0.476	1	ns
Thermanaerovibrio	0.017	0.016			Zhouia	8	0.476	1	ns
Rhizorhabdus	0.017	0.017			Zymobacter	16	0.476	1	ns
Dokdonia	0.017	0.016			Acetobacter	15	0.61	1	ns
Salipiger	0.017	0.017			Acetomicrobium	9	0.61	1	ns
Scytonema	0.017	0.015			Acidipropionibacterium	15	0.61	1	ns
Cyclobacterium	0.017	0.015			Acidithiobacillus	15	0.61	1	ns
Petrocella	0.017	0.014			Acinetobacter	15	0.61	1	ns
Thermobifida	0.017	0.017			Actinokineospora	9	0.61	1	ns
Ruegeria	0.017	0.017			Actinomyces	15	0.61	1	ns
Actinoalloteichus	0.017	0.017			Actinoplanes	9	0.61	1	ns
Meiothermus	0.017	0.018			Adhaeretor	9	0.61	1	ns
Roseiflexus	0.017	0.016			Adlercreutzia	15	0.61	1	ns
Kroppenstedtia	0.017	0.015			Aggregatimonas	9	0.61	1	ns
Pseudobacter	0.017	0.019			Alienimonas	15	0.61	1	ns
Kordia	0.017	0.016			Alistipes	9	0.61	1	ns
Sinomicrobium	0.017	0.018			Allofrancisella	9	0.61	1	ns
Ezakiella	0.016	0.016			Alteracholeplasma	15	0.61	1	ns
Thermomonospora	0.016	0.016			Anaerobacillus	15	0.61	1	ns
Gottfriedia	0.016	0.015			Anaerococcus	15	0.61	1	ns
Weizmannia	0.016	0.017			Ancylobacter	15	0.61	1	ns
Rhodobacter	0.016	0.016			Aquihabitans	15	0.61	1	ns
Keratinibaculum	0.016	0.015			Aquincola	9	0.61	1	ns
Hyphomonas	0.016	0.018			Aquirufa	15	0.61	1	ns
Zunongwangia	0.016	0.015			Aquisalinus	15	0.61	1	ns
Nibribacter	0.016	0.018			Arachnia	15	0.61	1	ns
Nibricoccus	0.016	0.016			Asticcacaulis	9	0.61	1	ns
Rhodovulum	0.016	0.018			Auraticoccus	9	0.61	1	ns
Urbifossiella	0.016	0.017			Azospirillum	15	0.61	1	ns
Thermotoga	0.016	0.014			Bernardetia	15	0.61	1	ns
Kyrpidia	0.016	0.015			Bombilactobacillus	15	0.61	1	ns
Sulfidibacter	0.016	0.016			Bosea	9	0.61	1	ns
Roseibium	0.016	0.016			Brasilonema	15	0.61	1	ns
Sulfolobus	0.016	0.014			Butyrivibrio	15	0.61	1	ns
Ferribacterium	0.016	0.015			Bythopirellula	9	0.61	1	ns
Persicimonas	0.016	0.016			Candidatus_Blochmannia	15	0.61	1	ns
Frateuria	0.016	0.015			Candidatus_Cytomitobacter	15	0.61	1	ns
Candidatus_Formimonas	0.016	0.016			Candidatus_Deianiraea	15	0.61	1	ns
Cardiobacterium	0.016	0.015			Candidatus_Formimonas	15	0.61	1	ns
Usitatibacter	0.016	0.016			Candidatus_Hodgkinia	15	0.61	1	ns
Acidihalobacter	0.016	0.014			Candidatus_Nanosynbacter	15	0.61	1	ns
Labrenzia	0.016	0.014			Candidatus_Purcelliella	9	0.61	1	ns
Asticcacaulis	0.016	0.018			Candidatus_Riesia	9	0.61	1	ns
Celeribacter	0.016	0.015			Candidatus_Steffania	15	0.61	1	ns
Azotobacter	0.015	0.016			Celeribacter	9	0.61	1	ns
Rivularia	0.015	0.014			Cellulosilyticum	15	0.61	1	ns
Chlorobium	0.015	0.016			Changchengzhania	15	0.61	1	ns
Sphingorhabdus	0.015	0.015			Changpingibacter	9	0.61	1	ns
Sebaldella	0.015	0.015			Chelatococcus	9	0.61	1	ns
Nitratireductor	0.015	0.016			Chitinibacter	9	0.61	1	ns
Arachnia	0.015	0.015			Chitinolyticbacter	9	0.61	1	ns
Ferrimonas	0.015	0.014			Chloroherpeton	9	0.61	1	ns
Phyllobacterium	0.015	0.016			Chryseobacterium	15	0.61	1	ns
Wenzhouxiangella	0.015	0.014			Chryseoglobus	15	0.61	1	ns
Mariniplasma	0.015	0.016			Citrobacter	15	0.61	1	ns
Pelobacter	0.015	0.015			Cytobacillus	15	0.61	1	ns
Denitratisoma	0.015	0.016			Denitrovibrio	9	0.61	1	ns
Avibacterium	0.015	0.01			Desulfobulbus	15	0.61	1	ns
Pelolinea	0.015	0.015			Desulfofarcimen	15	0.61	1	ns
Botrimarina	0.015	0.016			Desulfoglaeba	15	0.61	1	ns
Actinocatenispora	0.015	0.015			Desulfolutivibrio	15	0.61	1	ns
Salicibibacter	0.015	0.014			Desulfosarcina	9	0.61	1	ns
Acetoanaerobium	0.015	0.015			Desulfurispirillum	15	0.61	1	ns
Roseimicrobium	0.015	0.015			Desulfurivibrio	15	0.61	1	ns
Rhizobacter	0.015	0.017			Desulfuromonas	9	0.61	1	ns
Vulgatibacter	0.015	0.017			Devosia	15	0.61	1	ns
Stieleria	0.015	0.014			Dictyoglomus	15	0.61	1	ns
Thiodictyon	0.015	0.015			Dissulfurimicrobium	15	0.61	1	ns
Bulleidia	0.015	0.017			Dolichospermum	15	0.61	1	ns
Pirellulimonas	0.015	0.015			Echinicola	9	0.61	1	ns
Aquitalea	0.015	0.016			Elioraea	15	0.61	1	ns
Liberibacter	0.015	0.015			Ewingella	15	0.61	1	ns
Phnomibacter	0.015	0.017			Faecalibacterium	15	0.61	1	ns
Glaesserella	0.015	0.011			Fenollaria	15	0.61	1	ns
Aneurinibacillus	0.015	0.013			Flavivirga	15	0.61	1	ns
Cyanobacterium	0.015	0.012			Fluviibacter	9	0.61	1	ns
Mucispirillum	0.015	0.013			Formicincola	9	0.61	1	ns
Candidatus_Profftia	0.015	0.013			Frateuria	15	0.61	1	ns
Stanieria	0.015	0.014			Frigoriglobus	15	0.61	1	ns
Mesoflavibacter	0.015	0.012			Fuscovulum	15	0.61	1	ns
Halorubrum	0.015	0.012			Fusobacterium	15	0.61	1	ns
Maridesulfovibrio	0.015	0.014			Gemmobacter	9	0.61	1	ns
Kingella	0.015	0.014			Geobacter	9	0.61	1	ns
Methylomusa	0.015	0.014			Glycocaulis	9	0.61	1	ns
Seonamhaeicola	0.015	0.012			Gottschalkia	15	0.61	1	ns
Humisphaera	0.014	0.015			Gramella	15	0.61	1	ns
Candidatus_Desulforudis	0.014	0.012			Granulicatella	15	0.61	1	ns
Desulfosediminicola	0.014	0.013			Gymnodinialimonas	9	0.61	1	ns
Roseivivax	0.014	0.013			Halanaerobium	15	0.61	1	ns
Ectothiorhodospira	0.014	0.015			Halobacillus	15	0.61	1	ns
Caldilinea	0.014	0.013			Halogeometricum	9	0.61	1	ns
Methylomicrobium	0.014	0.013			Haloglomus	15	0.61	1	ns
Sphingosinicella	0.014	0.015			Halorussus	15	0.61	1	ns
Phycisphaera	0.014	0.015			Halotalea	9	0.61	1	ns
Dehalobacterium	0.014	0.014			Haploplasma	15	0.61	1	ns
Nitrosomonas	0.014	0.013			Helcococcus	15	0.61	1	ns
Aliivibrio	0.014	0.013			Hydrogenibacillus	15	0.61	1	ns
Paraflavitalea	0.014	0.014			Hydrogenimonas	15	0.61	1	ns
Lentzea	0.014	0.015			Immundisolibacter	15	0.61	1	ns
Chloracidobacterium	0.014	0.016			Iocasia	9	0.61	1	ns
Endozoicomonas	0.014	0.013			Keratinibaculum	15	0.61	1	ns
Sporomusa	0.014	0.015			Kordiimonas	15	0.61	1	ns
Oenococcus	0.014	0.014			Latilactobacillus	15	0.61	1	ns
Phytohabitans	0.014	0.015			Legionella	15	0.61	1	ns
Allochromatium	0.014	0.015			Leisingera	15	0.61	1	ns
Schnuerera	0.014	0.013			Leptospira	15	0.61	1	ns
Desulfolutivibrio	0.014	0.014			Leptospirillum	9	0.61	1	ns
Gudongella	0.014	0.014			Leptothrix	15	0.61	1	ns
Psychroflexus	0.014	0.011			Leptotrichia	15	0.61	1	ns
Ureibacillus	0.014	0.012			Ligilactobacillus	15	0.61	1	ns
Chroococcidiopsis	0.014	0.014			Lignipirellula	9	0.61	1	ns
Candidatus_Syntrophocurvum	0.014	0.011			Luteibacter	9	0.61	1	ns
Dolichospermum	0.014	0.012			Luteithermobacter	15	0.61	1	ns
Rosistilla	0.014	0.017			Magnetospira	9	0.61	1	ns
Ferruginibacter	0.014	0.014			Mameliella	9	0.61	1	ns
Halobacteriovorax	0.014	0.013			Maribellus	15	0.61	1	ns
Nitrospirillum	0.014	0.014			Mariniplasma	9	0.61	1	ns
Pseudoarcobacter	0.014	0.013			Mesoplasma	15	0.61	1	ns
Paraglaciecola	0.014	0.012			Metamycoplasma	15	0.61	1	ns
Mucisphaera	0.014	0.014			Methanoculleus	9	0.61	1	ns
Hyphobacterium	0.014	0.012			Methanomethylovorans	9	0.61	1	ns
Pyxidicoccus	0.014	0.013			Methanoregula	15	0.61	1	ns
Dactylosporangium	0.014	0.014			Methylocella	15	0.61	1	ns
Edaphobacter	0.014	0.014			Methyloligella	9	0.61	1	ns
Tepidiforma	0.014	0.014			Methylomonas	15	0.61	1	ns
Candidatus_Methylopumilus	0.014	0.013			Microlunatus	9	0.61	1	ns
Jonquetella	0.014	0.013			Microterricola	9	0.61	1	ns
Cobetia	0.014	0.014			Microvirga	9	0.61	1	ns
Bombilactobacillus	0.014	0.012			Mogibacterium	9	0.61	1	ns
Flaviflexus	0.014	0.017			Mongoliitalea	15	0.61	1	ns
Nitrogeniibacter	0.014	0.014			Myxococcus	9	0.61	1	ns
Aminobacter	0.013	0.012			Nakamurella	9	0.61	1	ns
Paenarthrobacter	0.013	0.014			Natranaerobius	15	0.61	1	ns
Candidatus_Planktophila	0.013	0.013			Natrinema	9	0.61	1	ns
Nautilia	0.013	0.012			Neisseria	15	0.61	1	ns
Faecalitalea	0.013	0.012			Neptunomonas	9	0.61	1	ns
Leisingera	0.013	0.013			Niastella	9	0.61	1	ns
Trichlorobacter	0.013	0.012			Nitrosococcus	15	0.61	1	ns
Chondromyces	0.013	0.012			Nitrosomonas	15	0.61	1	ns
Anaerolinea	0.013	0.014			Nitrososphaera	9	0.61	1	ns
Sulfuriroseicoccus	0.013	0.015			Nitrospira	9	0.61	1	ns
Starkeya	0.013	0.014			Niveispirillum	15	0.61	1	ns
Limnoglobus	0.013	0.014			Nocardioides	9	0.61	1	ns
Pigmentiphaga	0.013	0.015			Octadecabacter	15	0.61	1	ns
Plantactinospora	0.013	0.014			Odoribacter	15	0.61	1	ns
Staphylospora	0.013	0.012			Oenococcus	9	0.61	1	ns
Kribbella	0.013	0.014			Orrella	15	0.61	1	ns
Kurthia	0.013	0.011			Paenibacillus	15	0.61	1	ns
Pontibacillus	0.013	0.012			Paludibacter	9	0.61	1	ns
Thermanaerosceptrum	0.013	0.012			Paludisphaera	15	0.61	1	ns
Lelliottia	0.013	0.012			Panacibacter	9	0.61	1	ns
Tardiphaga	0.013	0.012			Paraconexibacter	15	0.61	1	ns
Salinivirga	0.013	0.014			Paraliobacillus	9	0.61	1	ns
Aquibium	0.013	0.013			Parasaccharibacter	9	0.61	1	ns
Biomaibacter	0.013	0.012			Paremcibacter	15	0.61	1	ns
Mahella	0.013	0.013			Parolsenella	9	0.61	1	ns
Oleidesulfovibrio	0.013	0.012			Pasteurella	15	0.61	1	ns
Gardnerella	0.013	0.012			Pectinatus	15	0.61	1	ns
Paucilactobacillus	0.013	0.011			Pedobacter	15	0.61	1	ns
Orrella	0.013	0.012			Pelodictyon	9	0.61	1	ns
Syntrophothermus	0.013	0.013			Persephonella	9	0.61	1	ns
Pluralibacter	0.013	0.012			Phaeobacter	9	0.61	1	ns
Methanoculleus	0.013	0.012			Photobacterium	15	0.61	1	ns
Pseudolabrys	0.013	0.013			Picrophilus	15	0.61	1	ns
Saccharolobus	0.013	0.011			Pigmentiphaga	9	0.61	1	ns
Aureibaculum	0.013	0.011			Pirellula	15	0.61	1	ns
Candidatus_Contubernalis	0.013	0.013			Planctopirus	15	0.61	1	ns
Sphaerotilus	0.013	0.016			Planktothrix	15	0.61	1	ns
Urechidicola	0.013	0.011			Porphyrobacter	9	0.61	1	ns
Halorhodospira	0.013	0.013			Porphyromonas	9	0.61	1	ns
Kinneretia	0.013	0.013			Protaetiibacter	9	0.61	1	ns
Candidatus_Nitrosocosmicus	0.013	0.012			Proteus	15	0.61	1	ns
Solibacillus	0.013	0.011			Pseudarthrobacter	9	0.61	1	ns
Niastella	0.013	0.015			Pseudoalteromonas	15	0.61	1	ns
Sphaerobacter	0.013	0.012			Pseudohalocynthiibacter	9	0.61	1	ns
Desulfobacter	0.013	0.012			Pseudomonas	15	0.61	1	ns
Paludisphaera	0.013	0.013			Pseudooceanicola	15	0.61	1	ns
Acididesulfobacillus	0.012	0.012			Pseudoxanthomonas	9	0.61	1	ns
Vogesella	0.012	0.012			Psychrobacillus	15	0.61	1	ns
Alienimonas	0.012	0.011			Psychrobacter	15	0.61	1	ns
Methanoplanus	0.012	0.011			Psychromonas	15	0.61	1	ns
Tsuneonella	0.012	0.013			Reinekea	15	0.61	1	ns
Orientia	0.012	0.009			Rhodospirillum	15	0.61	1	ns
Sedimentisphaera	0.012	0.013			Rhodothermus	9	0.61	1	ns
Blastochloris	0.012	0.013			Roseiflexus	15	0.61	1	ns
Fimbriimonas	0.012	0.012			Rossellomorea	15	0.61	1	ns
Desulfococcus	0.012	0.014			Rothia	9	0.61	1	ns
Desulfosudis	0.012	0.013			Rouxiella	9	0.61	1	ns
Thiomicrorhabdus	0.012	0.012			Rubinisphaera	15	0.61	1	ns
Plantibacter	0.012	0.013			Saccharopolyspora	9	0.61	1	ns
Croceimicrobium	0.012	0.014			Salegentibacter	15	0.61	1	ns
Solimonas	0.012	0.012			Salidesulfovibrio	9	0.61	1	ns
Stackebrandtia	0.012	0.011			Serpentinicella	15	0.61	1	ns
Abyssalbus	0.012	0.01			Serratia	15	0.61	1	ns
Dehalogenimonas	0.012	0.014			Siansivirga	9	0.61	1	ns
Arcanobacterium	0.012	0.014			Sinomicrobium	9	0.61	1	ns
Mycetocola	0.012	0.013			Sphaerochaeta	9	0.61	1	ns
Mariniflexile	0.012	0.01			Sphingosinicella	9	0.61	1	ns
Candidatus_Uabimicrobium	0.012	0.012			Stanieria	15	0.61	1	ns
Baekduia	0.012	0.011			Streptomonospora	15	0.61	1	ns
Fictibacillus	0.012	0.011			Stygiolobus	9	0.61	1	ns
Syntrophobotulus	0.012	0.012			Succinivibrio	15	0.61	1	ns
Frigoriglobus	0.012	0.012			Sulfidibacter	15	0.61	1	ns
Salisediminibacterium	0.012	0.012			Sulfolobus	15	0.61	1	ns
Desulfoscipio	0.012	0.011			Sulfuricaulis	9	0.61	1	ns
Deferribacter	0.012	0.011			Sulfuricurvum	15	0.61	1	ns
Chelatococcus	0.012	0.014			Sulfuriferula	15	0.61	1	ns
Schlegelella	0.012	0.013			Sulfuriroseicoccus	9	0.61	1	ns
Tamlana	0.012	0.011			Symbiobacterium	15	0.61	1	ns
Modestobacter	0.012	0.012			Syntrophobacter	15	0.61	1	ns
Capillimicrobium	0.012	0.012			Tepidibacter	9	0.61	1	ns
Iocasia	0.012	0.011			Terribacillus	15	0.61	1	ns
Roseimaritima	0.012	0.013			Thalassococcus	9	0.61	1	ns
Marivirga	0.012	0.01			Thermacetogenium	9	0.61	1	ns
Ndongobacter	0.012	0.01			Thermobifida	15	0.61	1	ns
Halorussus	0.012	0.012			Thermococcus	15	0.61	1	ns
Stappia	0.012	0.01			Thermodesulfobium	15	0.61	1	ns
Williamsoniiplasma	0.012	0.011			Thermosulfidibacter	15	0.61	1	ns
Halobacteroides	0.012	0.013			Thermosynechococcus	15	0.61	1	ns
Geoalkalibacter	0.012	0.011			Thioalkalivibrio	9	0.61	1	ns
Thermodesulfobium	0.012	0.011			Thiobacillus	9	0.61	1	ns
Thiohalobacter	0.012	0.011			Thiocapsa	15	0.61	1	ns
Syntrophobacter	0.012	0.011			Thiocystis	15	0.61	1	ns
Zobellella	0.012	0.013			Thiospirochaeta	15	0.61	1	ns
Candidatus_Cardinium	0.012	0.009			Tyzzerella	15	0.61	1	ns
Anaerobacillus	0.012	0.011			Undibacterium	9	0.61	1	ns
Paraconexibacter	0.012	0.01			Vulgatibacter	9	0.61	1	ns
Methylosinus	0.012	0.011			Wansuia	9	0.61	1	ns
Parascardovia	0.012	0.012			Wenzhouxiangella	15	0.61	1	ns
Cryptobacterium	0.011	0.013			Wigglesworthia	15	0.61	1	ns
Lentibacillus	0.011	0.009			Wolbachia	15	0.61	1	ns
Ramlibacter	0.011	0.013			Zobellia	9	0.61	1	ns
Silvanigrella	0.011	0.01			Zunongwangia	15	0.61	1	ns
Fervidobacterium	0.011	0.011			Acholeplasma	14	0.762	1	ns
Allofrancisella	0.011	0.011			Achromobacter	14	0.762	1	ns
Halobacterium	0.011	0.012			Acidaminococcus	14	0.762	1	ns
Nitratiruptor	0.011	0.01			Acididesulfobacillus	14	0.762	1	ns
Sulfurisphaera	0.011	0.01			Actinoalloteichus	10	0.762	1	ns
Cytophaga	0.011	0.01			Actinobaculum	14	0.762	1	ns
Idiomarina	0.011	0.01			Actinomadura	14	0.762	1	ns
Candidatus_Koribacter	0.011	0.014			Actinosynnema	14	0.762	1	ns
Halobaculum	0.011	0.013			Actinotignum	14	0.762	1	ns
Rhodovastum	0.011	0.011			Advenella	14	0.762	1	ns
Protaetiibacter	0.011	0.011			Aerococcus	10	0.762	1	ns
Dolosigranulum	0.011	0.011			Aerosticca	14	0.762	1	ns
Vitreoscilla	0.011	0.011			Afipia	10	0.762	1	ns
Caulifigura	0.011	0.011			Algibacter	14	0.762	1	ns
Flavivirga	0.011	0.01			Alicyclobacillus	14	0.762	1	ns
Candidatus_Methanoplasma	0.011	0.017			Alkalibacter	10	0.762	1	ns
Halovivax	0.011	0.01			Alkalicella	14	0.762	1	ns
Filifactor	0.011	0.012			Alkalihalobacillus	14	0.762	1	ns
Pirellula	0.011	0.01			Alkaliphilus	10	0.762	1	ns
Desulfofarcimen	0.011	0.01			Alloacidobacterium	14	0.762	1	ns
Desulfurivibrio	0.011	0.01			Allobaculum	10	0.762	1	ns
Haloterrigena	0.011	0.011			Altererythrobacter	10	0.762	1	ns
Pannonibacter	0.011	0.012			Amphritea	10	0.762	1	ns
Sulfurifustis	0.011	0.011			Anaeromyxobacter	10	0.762	1	ns
Desulfurispirillum	0.011	0.01			Antarcticibacterium	14	0.762	1	ns
Phycicoccus	0.011	0.011			Anthocerotibacter	14	0.762	1	ns
Cruoricaptor	0.011	0.012			Aquibium	10	0.762	1	ns
Loigolactobacillus	0.011	0.011			Aquifex	14	0.762	1	ns
Thiocystis	0.011	0.011			Aquiflexum	14	0.762	1	ns
Candidatus_Atelocyanobacterium	0.011	0.01			Arcobacter	14	0.762	1	ns
Catenulispora	0.011	0.011			Arenimonas	14	0.762	1	ns
Oceanithermus	0.011	0.012			Aromatoleum	14	0.762	1	ns
Candidatus_Portiera	0.011	0.009			Atopobium	14	0.762	1	ns
Euzebya	0.011	0.012			Aurantiacibacter	14	0.762	1	ns
Croceibacter	0.011	0.009			Aureibaculum	14	0.762	1	ns
Mangrovivirga	0.011	0.01			Azospira	10	0.762	1	ns
Sneathia	0.011	0.009			Bacteroides	10	0.762	1	ns
Thiospirochaeta	0.011	0.01			Basfia	14	0.762	1	ns
Oleiharenicola	0.011	0.011			Berryella	14	0.762	1	ns
Actinosynnema	0.011	0.011			Bifidobacterium	10	0.762	1	ns
Tistrella	0.011	0.01			Blastochloris	14	0.762	1	ns
Aquiflexum	0.011	0.009			Blastococcus	10	0.762	1	ns
Arcticibacterium	0.011	0.011			Bordetella	14	0.762	1	ns
Bremerella	0.011	0.011			Bradyrhizobium	14	0.762	1	ns
Anoxybacter	0.011	0.011			Breoghania	10	0.762	1	ns
Microcella	0.011	0.01			Brochothrix	14	0.762	1	ns
Thalassotalea	0.011	0.011			Brucepastera	14	0.762	1	ns
Faecalibacter	0.011	0.009			Caldisericum	10	0.762	1	ns
Pseudosulfitobacter	0.011	0.012			Candidatus_Arthromitus	14	0.762	1	ns
Cystobacter	0.011	0.01			Candidatus_Endoriftia	14	0.762	1	ns
Wielerella	0.011	0.01			Candidatus_Fukatsuia	14	0.762	1	ns
Dermabacter	0.011	0.012			Candidatus_Hepatoplasma	14	0.762	1	ns
Singulisphaera	0.01	0.009			Candidatus_Methylopumilus	14	0.762	1	ns
Zymomonas	0.01	0.01			Candidatus_Methylospira	14	0.762	1	ns
Blastococcus	0.01	0.011			Candidatus_Neoehrlichia	14	0.762	1	ns
Nitrosospira	0.01	0.011			Candidatus_Phytoplasma	14	0.762	1	ns
Octadecabacter	0.01	0.01			Candidatus_Velamenicoccus	14	0.762	1	ns
Thiocapsa	0.01	0.01			Capillimicrobium	10	0.762	1	ns
Uruburuella	0.01	0.009			Cardiobacterium	14	0.762	1	ns
Candidatus_Cyclonatronum	0.01	0.01			Casimicrobium	14	0.762	1	ns
Candidatus_Prometheoarchaeum	0.01	0.01			Cedecea	14	0.762	1	ns
Granulicatella	0.01	0.01			Cellulomonas	10	0.762	1	ns
Rubrivivax	0.01	0.01			Chromohalobacter	14	0.762	1	ns
Thermosediminibacter	0.01	0.01			Chroococcidiopsis	10	0.762	1	ns
Iamia	0.01	0.011			Chryseolinea	10	0.762	1	ns
Brucepastera	0.01	0.009			Clavibacter	14	0.762	1	ns
Stigmatella	0.01	0.011			Cloacibacillus	14	0.762	1	ns
Eikenella	0.01	0.009			Collinsella	14	0.762	1	ns
Caldisphaera	0.01	0.006			Colwellia	10	0.762	1	ns
Ignavibacterium	0.01	0.009			Congregibacter	14	0.762	1	ns
Natrinema	0.01	0.011			Constantimarinum	10	0.762	1	ns
Kushneria	0.01	0.011			Coraliomargarita	14	0.762	1	ns
Pusillimonas	0.01	0.009			Coriobacterium	10	0.762	1	ns
Radiobacillus	0.01	0.01			Couchioplanes	10	0.762	1	ns
Melaminivora	0.01	0.01			Croceimicrobium	10	0.762	1	ns
Pseudoleptotrichia	0.01	0.01			Cryobacterium	14	0.762	1	ns
Acidiphilium	0.01	0.01			Curvibacter	10	0.762	1	ns
Piscirickettsia	0.01	0.009			Cutibacterium	14	0.762	1	ns
Agarivorans	0.01	0.009			Cyclobacterium	14	0.762	1	ns
Chondrocystis	0.01	0.013			Cystobacter	14	0.762	1	ns
Sinomonas	0.01	0.01			Deefgea	14	0.762	1	ns
Fluviispira	0.01	0.01			Defluviitoga	10	0.762	1	ns
Emticicia	0.01	0.011			Dehalogenimonas	10	0.762	1	ns
Paenisporosarcina	0.01	0.009			Delftia	10	0.762	1	ns
Anaerohalosphaera	0.01	0.011			Dermacoccus	10	0.762	1	ns
Propioniciclava	0.01	0.012			Desulfarculus	10	0.762	1	ns
Fluviicola	0.01	0.009			Desulfocapsa	14	0.762	1	ns
Paroceanicella	0.01	0.011			Desulfomicrobium	10	0.762	1	ns
Elusimicrobium	0.01	0.01			Desulfosporosinus	14	0.762	1	ns
Entomomonas	0.01	0.009			Desulfosudis	14	0.762	1	ns
Lancefieldella	0.01	0.01			Desulfotalea	14	0.762	1	ns
Crocinitomix	0.01	0.01			Dokdonia	14	0.762	1	ns
Roseococcus	0.01	0.009			Dolosigranulum	10	0.762	1	ns
Belliella	0.01	0.009			Dyadobacter	14	0.762	1	ns
Bradymonas	0.01	0.01			Dyella	10	0.762	1	ns
Syntrophus	0.01	0.01			Eggerthella	10	0.762	1	ns
Candidatus_Saccharimonas	0.01	0.008			Epilithonimonas	10	0.762	1	ns
Ilyobacter	0.01	0.009			Ereboglobus	10	0.762	1	ns
Mariprofundus	0.01	0.01			Erysipelothrix	10	0.762	1	ns
Thermodesulfobacterium	0.01	0.01			Eubacterium	14	0.762	1	ns
Nitrosococcus	0.01	0.009			Ezakiella	14	0.762	1	ns
Schleiferilactobacillus	0.01	0.01			Faecalibaculum	10	0.762	1	ns
Floricoccus	0.01	0.009			Fictibacillus	14	0.762	1	ns
Spongiibacter	0.01	0.009			Filomicrobium	10	0.762	1	ns
Sulfuriferula	0.01	0.01			Flammeovirga	14	0.762	1	ns
Salinimonas	0.01	0.009			Flavobacterium	14	0.762	1	ns
Alloacidobacterium	0.01	0.009			Flexistipes	10	0.762	1	ns
Aquincola	0.01	0.01			Francisella	14	0.762	1	ns
Pimelobacter	0.01	0.011			Fretibacterium	14	0.762	1	ns
Tomitella	0.01	0.01			Frigidibacter	14	0.762	1	ns
Lignipirellula	0.01	0.01			Frigoribacterium	14	0.762	1	ns
Nitratifractor	0.01	0.01			Frondihabitans	10	0.762	1	ns
Microterricola	0.01	0.012			Fructilactobacillus	10	0.762	1	ns
Hafnia	0.01	0.01			Fructobacillus	14	0.762	1	ns
Melittangium	0.01	0.01			Galbibacter	14	0.762	1	ns
Teredinibacter	0.01	0.009			Gallionella	14	0.762	1	ns
Marichromatium	0.01	0.01			Gardnerella	14	0.762	1	ns
Natranaerofaba	0.01	0.009			Gemella	14	0.762	1	ns
Hahella	0.01	0.01			Georhizobium	14	0.762	1	ns
Kangiella	0.01	0.01			Geotalea	14	0.762	1	ns
Thermincola	0.01	0.009			Gottfriedia	14	0.762	1	ns
Maioricimonas	0.01	0.009			Gracilibacillus	14	0.762	1	ns
Jeongeupia	0.009	0.009			Granulibacter	10	0.762	1	ns
Desulfotomaculum	0.009	0.009			Grimontia	14	0.762	1	ns
Larkinella	0.009	0.01			Gynuella	14	0.762	1	ns
Desulfoglaeba	0.009	0.009			Haliangium	10	0.762	1	ns
Kluyvera	0.009	0.009			Halomarina	10	0.762	1	ns
Terribacillus	0.009	0.009			Halomicroarcula	10	0.762	1	ns
Melissococcus	0.009	0.008			Haloplanus	10	0.762	1	ns
Simiduia	0.009	0.007			Halopseudomonas	14	0.762	1	ns
Acuticoccus	0.009	0.01			Halorhabdus	10	0.762	1	ns
Methylacidimicrobium	0.009	0.009			Halorhodospira	14	0.762	1	ns
Alkalicella	0.009	0.009			Halosimplex	10	0.762	1	ns
Flagellimonas	0.009	0.011			Hathewaya	14	0.762	1	ns
Haloplanus	0.009	0.01			Heyndrickxia	14	0.762	1	ns
Tepidanaerobacter	0.009	0.008			Hoeflea	10	0.762	1	ns
Thermacetogenium	0.009	0.01			Hungatella	14	0.762	1	ns
Koinonema	0.009	0.009			Hydrogenobaculum	10	0.762	1	ns
Granulibacter	0.009	0.009			Ilumatobacter	14	0.762	1	ns
Niveispirillum	0.009	0.009			Jejubacter	14	0.762	1	ns
Limihaloglobus	0.009	0.01			Kerstersia	14	0.762	1	ns
Wenyingzhuangia	0.009	0.01			Kineobactrum	14	0.762	1	ns
Natranaerobius	0.009	0.009			Kineococcus	14	0.762	1	ns
Thermochromatium	0.009	0.009			Kinneretia	10	0.762	1	ns
Undibacterium	0.009	0.01			Kiritimatiella	14	0.762	1	ns
Egicoccus	0.009	0.009			Komagataeibacter	10	0.762	1	ns
Entomoplasma	0.009	0.009			Kordia	10	0.762	1	ns
Methyloceanibacter	0.009	0.01			Kribbella	14	0.762	1	ns
Mitsuaria	0.009	0.008			Kroppenstedtia	14	0.762	1	ns
Oceanimonas	0.009	0.008			Ktedonosporobacter	10	0.762	1	ns
Methylophaga	0.009	0.008			Lachnospira	14	0.762	1	ns
Sabulilitoribacter	0.009	0.009			Lacrimispora	14	0.762	1	ns
Sanguibacter	0.009	0.011			Lacticaseibacillus	14	0.762	1	ns
Thioflavicoccus	0.009	0.01			Leclercia	10	0.762	1	ns
Candidatus_Carsonella	0.009	0.008			Leifsonia	10	0.762	1	ns
Stella	0.009	0.01			Lentzea	14	0.762	1	ns
Thermosulfurimonas	0.009	0.009			Levilactobacillus	14	0.762	1	ns
Actinopolymorpha	0.009	0.008			Limosilactobacillus	14	0.762	1	ns
Alicycliphilus	0.009	0.008			Loktanella	10	0.762	1	ns
Dermacoccus	0.009	0.009			Lonsdalea	14	0.762	1	ns
Isoptericola	0.009	0.009			Luteimonas	10	0.762	1	ns
Paraphotobacterium	0.009	0.008			Luteitalea	14	0.762	1	ns
Filimonas	0.009	0.008			Magnetospirillum	10	0.762	1	ns
Immundisolibacter	0.009	0.009			Maioricimonas	14	0.762	1	ns
Rheinheimera	0.009	0.008			Malaciobacter	14	0.762	1	ns
Frondihabitans	0.009	0.009			Malacoplasma	10	0.762	1	ns
Lonsdalea	0.009	0.009			Mangrovibacillus	10	0.762	1	ns
Methanothrix	0.009	0.01			Marichromatium	10	0.762	1	ns
Ammonifex	0.009	0.009			Mariniflexile	14	0.762	1	ns
Halioglobus	0.009	0.009			Marinitoga	14	0.762	1	ns
Labrys	0.009	0.009			Massilia	10	0.762	1	ns
Natronomonas	0.009	0.009			Megamonas	14	0.762	1	ns
Thermobaculum	0.009	0.012			Mesoflavibacter	14	0.762	1	ns
Candidatus_Annandia	0.009	0.013			Mesomycoplasma	10	0.762	1	ns
Roseobacter	0.009	0.008			Metallosphaera	10	0.762	1	ns
Thiomicrospira	0.009	0.007			Methanocaldococcus	14	0.762	1	ns
Aquabacter	0.009	0.008			Methanospirillum	14	0.762	1	ns
Halothermothrix	0.009	0.007			Methanothermobacter	14	0.762	1	ns
Candidatus_Babela	0.009	0.006			Methanothermococcus	14	0.762	1	ns
Pseudopedobacter	0.009	0.009			Methanothermus	14	0.762	1	ns
Rummeliibacillus	0.009	0.007			Methylacidimicrobium	10	0.762	1	ns
Herbiconiux	0.009	0.01			Methylobacter	14	0.762	1	ns
Methylogaea	0.009	0.009			Methylosinus	14	0.762	1	ns
Nordella	0.009	0.008			Microbulbifer	10	0.762	1	ns
Truepera	0.009	0.009			Micropruina	10	0.762	1	ns
Catellatospora	0.009	0.008			Miniimonas	10	0.762	1	ns
Thermodesulfovibrio	0.009	0.007			Miniphocaeibacter	10	0.762	1	ns
Jatrophihabitans	0.009	0.009			Moorella	14	0.762	1	ns
Nitrosophilus	0.009	0.007			Moorena	14	0.762	1	ns
Methylocella	0.009	0.008			Mucispirillum	14	0.762	1	ns
Desulfohalobium	0.009	0.008			Muriicola	14	0.762	1	ns
Mesotoga	0.009	0.007			Mycetohabitans	14	0.762	1	ns
Halothiobacillus	0.009	0.008			Mycolicibacterium	10	0.762	1	ns
Lacibacter	0.009	0.008			Mycoplasma	14	0.762	1	ns
Ilumatobacter	0.008	0.009			Natronoglycomyces	10	0.762	1	ns
Methanofollis	0.008	0.009			Neobacillus	14	0.762	1	ns
Methanocella	0.008	0.01			Nibricoccus	10	0.762	1	ns
Sulfurivermis	0.008	0.009			Nitrosophilus	14	0.762	1	ns
Azorhizobium	0.008	0.008			Nocardiopsis	10	0.762	1	ns
Methylomagnum	0.008	0.009			Novacetimonas	10	0.762	1	ns
Psychromonas	0.008	0.008			Novosphingobium	10	0.762	1	ns
Sporolactobacillus	0.008	0.008			Oceanidesulfovibrio	14	0.762	1	ns
Methylovirgula	0.008	0.009			Oceanithermus	10	0.762	1	ns
Pseudorhizobium	0.008	0.008			Oligella	10	0.762	1	ns
Nisaea	0.008	0.008			Olleya	10	0.762	1	ns
Zhaonella	0.008	0.007			Opitutus	10	0.762	1	ns
Candidatus_Absconditicoccus	0.008	0.008			Ornithinimicrobium	10	0.762	1	ns
Candidatus_Kuenenia	0.008	0.008			Pacificitalea	10	0.762	1	ns
Synechocystis	0.008	0.008			Paeniclostridium	14	0.762	1	ns
Indioceanicola	0.008	0.009			Paeniglutamicibacter	10	0.762	1	ns
Methanolacinia	0.008	0.009			Pandoraea	14	0.762	1	ns
Yinghuangia	0.008	0.008			Paraclostridium	14	0.762	1	ns
Desulforapulum	0.008	0.008			Paraflavitalea	14	0.762	1	ns
Geovibrio	0.008	0.009			Paraphotobacterium	14	0.762	1	ns
Kytococcus	0.008	0.009			Pelistega	14	0.762	1	ns
Acetohalobium	0.008	0.008			Peptacetobacter	14	0.762	1	ns
Sediminispirochaeta	0.008	0.008			Peribacillus	14	0.762	1	ns
Symmachiella	0.008	0.009			Permianibacter	10	0.762	1	ns
Syntrophomonas	0.008	0.007			Petrimonas	10	0.762	1	ns
Arenibacter	0.008	0.008			Phenylobacterium	14	0.762	1	ns
Zhouia	0.008	0.009			Phototrophicus	10	0.762	1	ns
Coxiella	0.008	0.007			Piscirickettsia	14	0.762	1	ns
Methanothermobacter	0.008	0.008			Plantactinospora	10	0.762	1	ns
Paracholeplasma	0.008	0.007			Polaribacter	14	0.762	1	ns
Polymorphobacter	0.008	0.007			Polyangium	14	0.762	1	ns
Calditerrivibrio	0.008	0.007			Ponticoccus	10	0.762	1	ns
Pseudovibrio	0.008	0.007			Prosthecochloris	10	0.762	1	ns
Thermosynechococcus	0.008	0.008			Proteiniphilum	10	0.762	1	ns
Serpentinimonas	0.008	0.007			Pseudescherichia	14	0.762	1	ns
Laribacter	0.008	0.008			Pseudoarcobacter	14	0.762	1	ns
Kordiimonas	0.008	0.008			Pseudochrobactrum	10	0.762	1	ns
Allokutzneria	0.008	0.008			Pseudocnuella	14	0.762	1	ns
Lederbergia	0.008	0.007			Pseudodesulfovibrio	10	0.762	1	ns
Kibdelosporangium	0.008	0.009			Pseudoduganella	10	0.762	1	ns
Pseudanabaena	0.008	0.007			Pseudosulfitobacter	10	0.762	1	ns
Alysiella	0.008	0.01			Pyruvatibacter	10	0.762	1	ns
Castellaniella	0.008	0.007			Qiania	10	0.762	1	ns
Gillisia	0.008	0.007			Ramlibacter	10	0.762	1	ns
Viridibacillus	0.008	0.009			Raoultibacter	10	0.762	1	ns
Candidatus_Velamenicoccus	0.008	0.008			Rhizorhabdus	14	0.762	1	ns
Kaistia	0.008	0.007			Rhodopirellula	14	0.762	1	ns
Psychrosphaera	0.008	0.006			Rhodovulum	10	0.762	1	ns
Hydrogenovibrio	0.008	0.006			Rippkaea	14	0.762	1	ns
Defluviitoga	0.008	0.009			Rivularia	14	0.762	1	ns
Marinilactibacillus	0.008	0.01			Roseateles	10	0.762	1	ns
Couchioplanes	0.008	0.008			Roseibacterium	10	0.762	1	ns
Aegicerativicinus	0.008	0.006			Roseimaritima	14	0.762	1	ns
Hoeflea	0.008	0.009			Roseitalea	10	0.762	1	ns
Methylibium	0.008	0.008			Rubripirellula	10	0.762	1	ns
Neotabrizicola	0.008	0.007			Rubrivivax	14	0.762	1	ns
Crocosphaera	0.008	0.006			Rubrobacter	14	0.762	1	ns
Caldanaerobacter	0.008	0.006			Ruminiclostridium	14	0.762	1	ns
Dokdonella	0.008	0.008			Rummeliibacillus	14	0.762	1	ns
Owenweeksia	0.008	0.008			Saccharibacillus	14	0.762	1	ns
Sedimenticola	0.008	0.007			Saccharomonospora	14	0.762	1	ns
Sulfurimicrobium	0.008	0.008			Saccharospirillum	14	0.762	1	ns
Aeoliella	0.008	0.009			Saccharothrix	10	0.762	1	ns
Candidatus_Endolissoclinum	0.008	0.006			Salinigranum	14	0.762	1	ns
Novibacillus	0.008	0.007			Salinirubellus	14	0.762	1	ns
Ahniella	0.008	0.008			Salinivibrio	10	0.762	1	ns
Marinithermus	0.008	0.007			Salisediminibacterium	10	0.762	1	ns
Nosocomiicoccus	0.008	0.007			Sandaracinobacter	10	0.762	1	ns
Actinomarinicola	0.008	0.008			Schaalia	14	0.762	1	ns
Oscillatoria	0.008	0.006			Schnuerera	14	0.762	1	ns
Zobellia	0.008	0.008			Sedimentibacter	14	0.762	1	ns
Caldithrix	0.008	0.01			Sedimenticola	14	0.762	1	ns
Limnohabitans	0.008	0.008			Sedimentisphaera	10	0.762	1	ns
Caldibacillus	0.008	0.007			Sediminispirochaeta	14	0.762	1	ns
Microvenator	0.008	0.008			Seonamhaeicola	14	0.762	1	ns
Brochothrix	0.008	0.007			Shimwellia	14	0.762	1	ns
Afipia	0.008	0.007			Silicimonas	10	0.762	1	ns
Amphibacillus	0.008	0.007			Sinomonas	10	0.762	1	ns
Ideonella	0.008	0.007			Sinorhizobium	10	0.762	1	ns
Nodularia	0.008	0.008			Skermanella	10	0.762	1	ns
Aeribacillus	0.007	0.006			Sodalis	14	0.762	1	ns
Histophilus	0.007	0.005			Solibacillus	14	0.762	1	ns
Porphyrobacter	0.007	0.008			Sporosarcina	14	0.762	1	ns
Rodentibacter	0.007	0.006			Staphylococcus	14	0.762	1	ns
Thioclava	0.007	0.008			Starkeya	10	0.762	1	ns
Chamaesiphon	0.007	0.007			Stieleria	14	0.762	1	ns
Isosphaera	0.007	0.008			Streptobacillus	14	0.762	1	ns
Leeuwenhoekiella	0.007	0.007			Streptosporangium	14	0.762	1	ns
Streptomonospora	0.007	0.008			Suicoccus	14	0.762	1	ns
Trichormus	0.007	0.006			Sulfurifustis	14	0.762	1	ns
Acaryochloris	0.007	0.007			Sulfuritalea	14	0.762	1	ns
Acidiferrobacter	0.007	0.007			Sulfurovum	14	0.762	1	ns
Aquicella	0.007	0.008			Synechococcus	14	0.762	1	ns
Paraliobacillus	0.007	0.007			Syntrophomonas	14	0.762	1	ns
Laceyella	0.007	0.007			Tamlana	10	0.762	1	ns
Lautropia	0.007	0.008			Tannockella	10	0.762	1	ns
Pseudochrobactrum	0.007	0.008			Tatlockia	10	0.762	1	ns
Sulfuricaulis	0.007	0.008			Terasakiella	14	0.762	1	ns
Grimontia	0.007	0.008			Tetragenococcus	14	0.762	1	ns
Mongoliitalea	0.007	0.006			Thermincola	14	0.762	1	ns
Leadbetterella	0.007	0.007			Thermobispora	14	0.762	1	ns
Lichenihabitans	0.007	0.007			Thermogutta	14	0.762	1	ns
Moellerella	0.007	0.005			Thioclava	10	0.762	1	ns
Thermomicrobium	0.007	0.008			Thiodictyon	10	0.762	1	ns
Methanococcoides	0.007	0.007			Thiosulfatimonas	10	0.762	1	ns
Abyssicoccus	0.007	0.007			Tichowtungia	10	0.762	1	ns
Alkalilimnicola	0.007	0.008			Tistrella	14	0.762	1	ns
Thermobispora	0.007	0.007			Trueperella	14	0.762	1	ns
Xylophilus	0.007	0.007			Tumebacillus	10	0.762	1	ns
Haladaptatus	0.007	0.007			Ureibacillus	14	0.762	1	ns
Salinicoccus	0.007	0.007			Veillonella	14	0.762	1	ns
Melioribacter	0.007	0.006			Virgibacillus	10	0.762	1	ns
Hydrogenimonas	0.007	0.007			Vulcanisaeta	14	0.762	1	ns
Micropruina	0.007	0.008			Weissella	14	0.762	1	ns
Sulfuritortus	0.007	0.007			Wenyingzhuangia	14	0.762	1	ns
Aggregatimonas	0.007	0.008			Wielerella	10	0.762	1	ns
Flagellatimonas	0.007	0.007			Winogradskyella	14	0.762	1	ns
Gracilinema	0.007	0.007			Wujia	10	0.762	1	ns
Salinispira	0.007	0.007			Xylanimonas	14	0.762	1	ns
Chloroflexus	0.007	0.007			Youhaiella	10	0.762	1	ns
Anatilimnocola	0.007	0.007			Abyssalbus	13	0.914	1	ns
Ferrovibrio	0.007	0.008			Acaryochloris	11	0.914	1	ns
Parashewanella	0.007	0.005			Acetilactobacillus	13	0.914	1	ns
Egibacter	0.007	0.007			Acetoanaerobium	13	0.914	1	ns
Salinisphaera	0.007	0.006			Acidianus	13	0.914	1	ns
Candidatus_Neoehrlichia	0.007	0.006			Acidiphilium	13	0.914	1	ns
Panacibacter	0.007	0.008			Acidobacterium	11	0.914	1	ns
Alloactinosynnema	0.007	0.005			Aeromicrobium	13	0.914	1	ns
Gephyromycinifex	0.007	0.008			Agreia	11	0.914	1	ns
Lichenicola	0.007	0.007			Agrobacterium	11	0.914	1	ns
Kineobactrum	0.007	0.007			Agromyces	13	0.914	1	ns
Oryzomicrobium	0.007	0.007			Aliarcobacter	13	0.914	1	ns
Pararhodospirillum	0.007	0.008			Alicycliphilus	13	0.914	1	ns
Subtercola	0.007	0.008			Aliivibrio	13	0.914	1	ns
Candidatus_Nardonella	0.007	0.005			Alkaliflexus	11	0.914	1	ns
Xylella	0.007	0.007			Alkalitalea	13	0.914	1	ns
Acidobacterium	0.007	0.007			Allochromatium	11	0.914	1	ns
Crateriforma	0.007	0.007			Amedibacterium	13	0.914	1	ns
Raineyella	0.007	0.008			Aminobacterium	11	0.914	1	ns
Sulfuritalea	0.007	0.008			Ammonifex	13	0.914	1	ns
Candidatus_Hepatoplasma	0.007	0.007			Amniculibacterium	13	0.914	1	ns
Chitinimonas	0.007	0.006			Amphibacillus	13	0.914	1	ns
Natronosporangium	0.007	0.006			Amycolatopsis	11	0.914	1	ns
Turneriella	0.007	0.007			Anaerocolumna	13	0.914	1	ns
Nitrobacter	0.007	0.006			Anoxybacillus	11	0.914	1	ns
Pelagovum	0.007	0.007			Anoxybacter	11	0.914	1	ns
Bergeyella	0.007	0.007			Anseongella	11	0.914	1	ns
Methanothermococcus	0.007	0.005			Apibacter	13	0.914	1	ns
Methylacidiphilum	0.007	0.006			Aquabacter	13	0.914	1	ns
Changchengzhania	0.007	0.006			Aquabacterium	11	0.914	1	ns
Ciceribacter	0.007	0.007			Aquicella	11	0.914	1	ns
Marinicauda	0.007	0.007			Aquimarina	13	0.914	1	ns
Planctopirus	0.007	0.007			Arcticibacterium	13	0.914	1	ns
Caldichromatium	0.007	0.007			Arsenophonus	11	0.914	1	ns
Sediminicoccus	0.007	0.007			Arthrobacter	13	0.914	1	ns
Ichthyobacterium	0.007	0.006			Asaia	13	0.914	1	ns
Candidatus_Rhabdochlamydia	0.007	0.005			Aureliella	11	0.914	1	ns
Parasphingorhabdus	0.007	0.007			Auritidibacter	11	0.914	1	ns
Roseateles	0.007	0.008			Azoarcus	11	0.914	1	ns
Thiolapillus	0.007	0.007			Azorhizobium	13	0.914	1	ns
Methylocaldum	0.007	0.008			Bacillus	11	0.914	1	ns
Pontivivens	0.007	0.008			Barnesiella	11	0.914	1	ns
Aurantiacibacter	0.007	0.006			Beutenbergia	13	0.914	1	ns
Candidatus_Protochlamydia	0.007	0.006			Biomaibacter	13	0.914	1	ns
Halosimplex	0.007	0.006			Bizionia	13	0.914	1	ns
Pradoshia	0.007	0.006			Blastomonas	11	0.914	1	ns
Aquisalimonas	0.007	0.006			Blattabacterium	13	0.914	1	ns
Celerinatantimonas	0.007	0.005			Blautia	13	0.914	1	ns
Duganella	0.007	0.007			Borrelia	11	0.914	1	ns
Polycladomyces	0.007	0.007			Borreliella	13	0.914	1	ns
Methanothermus	0.007	0.007			Botrimarina	13	0.914	1	ns
Paradevosia	0.007	0.006			Brachyspira	11	0.914	1	ns
Rhodoplanes	0.007	0.007			Bradymonas	11	0.914	1	ns
Sphingosinithalassobacter	0.007	0.007			Brevundimonas	11	0.914	1	ns
Candidatus_Thioglobus	0.007	0.006			Buchnera	13	0.914	1	ns
Thermogutta	0.007	0.006			Caballeronia	13	0.914	1	ns
Elioraea	0.007	0.007			Caminibacter	13	0.914	1	ns
Oceanispirochaeta	0.007	0.005			Campylobacter	13	0.914	1	ns
Telmatocola	0.007	0.007			Candidatus_Absconditicoccus	13	0.914	1	ns
Candidatus_Fonsibacter	0.007	0.006			Candidatus_Arcticimaribacter	11	0.914	1	ns
Effusibacillus	0.007	0.007			Candidatus_Atelocyanobacterium	11	0.914	1	ns
Gilvibacter	0.007	0.007			Candidatus_Babela	13	0.914	1	ns
Aurantimicrobium	0.007	0.006			Candidatus_Chromulinivorax	11	0.914	1	ns
Frigidibacter	0.007	0.006			Candidatus_Contubernalis	11	0.914	1	ns
Methylotuvimicrobium	0.007	0.005			Candidatus_Endolissoclinum	13	0.914	1	ns
Defluviicoccus	0.007	0.006			Candidatus_Fonsibacter	11	0.914	1	ns
Kaustia	0.007	0.007			Candidatus_Hamiltonella	13	0.914	1	ns
Heliorestis	0.006	0.005			Candidatus_Ichthyocystis	11	0.914	1	ns
Magnetospira	0.006	0.007			Candidatus_Ishikawaella	11	0.914	1	ns
Acidisarcina	0.006	0.006			Candidatus_Kinetoplastibacterium	13	0.914	1	ns
Candidatus_Endoriftia	0.006	0.007			Candidatus_Midichloria	13	0.914	1	ns
Nesterenkonia	0.006	0.006			Candidatus_Nitrosocosmicus	13	0.914	1	ns
Tepidimonas	0.006	0.006			Candidatus_Nitrosomarinus	11	0.914	1	ns
Arsenicicoccus	0.006	0.005			Candidatus_Phaeomarinobacter	13	0.914	1	ns
Amniculibacterium	0.006	0.007			Candidatus_Portiera	13	0.914	1	ns
Thalassolituus	0.006	0.007			Candidatus_Prometheoarchaeum	13	0.914	1	ns
Kineococcus	0.006	0.007			Candidatus_Ruthia	13	0.914	1	ns
Musicola	0.006	0.006			Candidatus_Sulcia	11	0.914	1	ns
Haloferax	0.006	0.006			Candidatus_Thioglobus	11	0.914	1	ns
Sagittula	0.006	0.006			Candidatus_Vesicomyosocius	13	0.914	1	ns
Leptospirillum	0.006	0.007			Catellatospora	13	0.914	1	ns
Thiobacillus	0.006	0.006			Caulifigura	13	0.914	1	ns
Intrasporangium	0.006	0.007			Cellulophaga	11	0.914	1	ns
Spartinivicinus	0.006	0.005			Cetobacterium	13	0.914	1	ns
Coraliomargarita	0.006	0.007			Chamaesiphon	13	0.914	1	ns
Leptothrix	0.006	0.006			Chloracidobacterium	13	0.914	1	ns
Paradesulfovibrio_(ex_Waite_et_al__2020)	0.006	0.007			Chlorobaculum	11	0.914	1	ns
Taylorella	0.006	0.005			Chlorobium	11	0.914	1	ns
Kovacikia	0.006	0.007			Christensenella	13	0.914	1	ns
Nissabacter	0.006	0.006			Chromobacterium	11	0.914	1	ns
Niveibacterium	0.006	0.006			Citromicrobium	13	0.914	1	ns
Youhaiella	0.006	0.006			Clostridioides	13	0.914	1	ns
Candidatus_Cytomitobacter	0.006	0.005			Cognaticolwellia	13	0.914	1	ns
Ktedonosporobacter	0.006	0.006			Collimonas	11	0.914	1	ns
Galbibacter	0.006	0.006			Companilactobacillus	13	0.914	1	ns
Oxalobacter	0.006	0.004			Conexibacter	11	0.914	1	ns
Geitlerinema	0.006	0.006			Coprococcus	11	0.914	1	ns
Rhodoluna	0.006	0.005			Corallococcus	13	0.914	1	ns
Kosmotoga	0.006	0.006			Crenobacter	11	0.914	1	ns
Yangia	0.006	0.006			Croceicoccus	11	0.914	1	ns
Polymorphospora	0.006	0.006			Cupriavidus	13	0.914	1	ns
Richelia	0.006	0.004			Dactylosporangium	11	0.914	1	ns
Caldalkalibacillus	0.006	0.006			Deferribacter	13	0.914	1	ns
Parasphingopyxis	0.006	0.007			Dehalobacterium	11	0.914	1	ns
Parvibaculum	0.006	0.006			Dermatophilus	11	0.914	1	ns
Pikeienuella	0.006	0.006			Desulfitobacterium	13	0.914	1	ns
Psychroserpens	0.006	0.005			Desulfonema	13	0.914	1	ns
Actinokineospora	0.006	0.007			Desulforamulus	13	0.914	1	ns
Aquabacterium	0.006	0.007			Desulfoscipio	13	0.914	1	ns
Ferrigenium	0.006	0.006			Dialister	13	0.914	1	ns
Neptunomonas	0.006	0.006			Diaphorobacter	13	0.914	1	ns
Spiractinospora	0.006	0.007			Dietzia	13	0.914	1	ns
Brevefilum	0.006	0.007			Ectothiorhodosinus	11	0.914	1	ns
Tatumella	0.006	0.004			Ectothiorhodospira	13	0.914	1	ns
Alkalihalophilus	0.006	0.004			Edaphobacter	11	0.914	1	ns
Caenibius	0.006	0.006			Edwardsiella	13	0.914	1	ns
Guyparkeria	0.006	0.006			Effusibacillus	11	0.914	1	ns
Haloarcula	0.006	0.007			Egicoccus	11	0.914	1	ns
Oceanihabitans	0.006	0.006			Ehrlichia	13	0.914	1	ns
Phoenicibacter	0.006	0.006			Emticicia	11	0.914	1	ns
Bisgaardia	0.006	0.005			Enterocloster	13	0.914	1	ns
Costertonia	0.006	0.005			Entomobacter	11	0.914	1	ns
Deefgea	0.006	0.006			Entomoplasma	11	0.914	1	ns
Jeotgalibacillus	0.006	0.005			Faecalibacillus	11	0.914	1	ns
Verminephrobacter	0.006	0.005			Fastidiosipila	11	0.914	1	ns
Friedmanniella	0.006	0.006			Ferrigenium	13	0.914	1	ns
Desulfomarina	0.006	0.005			Ferruginibacter	13	0.914	1	ns
Gemmobacter	0.006	0.006			Fervidicoccus	13	0.914	1	ns
Pyruvatibacter	0.006	0.006			Fervidobacterium	13	0.914	1	ns
Sulfuricella	0.006	0.006			Fibrella	13	0.914	1	ns
Haloprofundus	0.006	0.005			Flagellatimonas	11	0.914	1	ns
Methanospirillum	0.006	0.006			Floricoccus	13	0.914	1	ns
Siansivirga	0.006	0.006			Fluviispira	11	0.914	1	ns
Casimicrobium	0.006	0.006			Frischella	13	0.914	1	ns
Ketogulonicigenium	0.006	0.006			Gallaecimonas	13	0.914	1	ns
Rhodomicrobium	0.006	0.006			Gelria	11	0.914	1	ns
Crenobacter	0.006	0.006			Geoalkalibacter	11	0.914	1	ns
Microcoleus	0.006	0.006			Geomonas	13	0.914	1	ns
Miniimonas	0.006	0.006			Gilliamella	13	0.914	1	ns
Actinotignum	0.006	0.006			Gimesia	13	0.914	1	ns
Thermoleptolyngbya	0.006	0.005			Gloeothece	13	0.914	1	ns
Anabaenopsis	0.006	0.005			Gluconobacter	13	0.914	1	ns
Breoghania	0.006	0.006			Glutamicibacter	11	0.914	1	ns
Desulfobacula	0.006	0.006			Gordonia	11	0.914	1	ns
Parvicella	0.006	0.005			Gordonibacter	11	0.914	1	ns
Paucibacter	0.006	0.006			Gracilinema	11	0.914	1	ns
Aquisalinus	0.006	0.005			Granulicella	11	0.914	1	ns
Fuerstiella	0.006	0.005			Haematobacter	13	0.914	1	ns
Muriicola	0.006	0.006			Haladaptatus	11	0.914	1	ns
Auraticoccus	0.006	0.006			Halarchaeum	11	0.914	1	ns
Candidatus_Arcticimaribacter	0.006	0.006			Halarcobacter	13	0.914	1	ns
Gluconacetobacter	0.006	0.006			Haloarcula	13	0.914	1	ns
Bizionia	0.006	0.004			Halobacterium	13	0.914	1	ns
Antarctobacter	0.006	0.006			Haloferax	13	0.914	1	ns
Frischella	0.006	0.005			Halomonas	13	0.914	1	ns
Cohaesibacter	0.006	0.005			Halothermothrix	13	0.914	1	ns
Wigglesworthia	0.006	0.005			Halothiobacillus	11	0.914	1	ns
Candidatus_Profftella	0.006	0.006			Hartmannibacter	13	0.914	1	ns
Citricoccus	0.006	0.007			Hydrogenophilus	13	0.914	1	ns
Noviherbaspirillum	0.006	0.006			Hyphomicrobium	11	0.914	1	ns
Candidatus_Methylospira	0.006	0.005			Ilyobacter	13	0.914	1	ns
Rubinisphaera	0.006	0.005			Indioceanicola	11	0.914	1	ns
Salinicola	0.006	0.005			Intestinibaculum	13	0.914	1	ns
Brasilonema	0.006	0.005			Isosphaera	11	0.914	1	ns
Carboxydothermus	0.006	0.006			Jannaschia	11	0.914	1	ns
Hartmannibacter	0.006	0.006			Jeotgalibaca	13	0.914	1	ns
Nanobdella	0.006	0.005			Jeotgalibacillus	13	0.914	1	ns
Asaia	0.006	0.006			Kaistia	11	0.914	1	ns
Aurantimonas	0.006	0.006			Kaustia	13	0.914	1	ns
Beutenbergia	0.006	0.005			Kingella	13	0.914	1	ns
Mobiluncus	0.006	0.006			Kosakonia	11	0.914	1	ns
Cnuibacter	0.006	0.007			Kurthia	11	0.914	1	ns
Curvibacter	0.006	0.006			Labrys	11	0.914	1	ns
Marixanthomonas	0.006	0.006			Laceyella	13	0.914	1	ns
Euzebyella	0.006	0.006			Lacinutrix	13	0.914	1	ns
Sediminicola	0.006	0.005			Lacipirellula	13	0.914	1	ns
Thermoactinomyces	0.006	0.007			Lactiplantibacillus	11	0.914	1	ns
Advenella	0.006	0.005			Lactobacillus	13	0.914	1	ns
Chthonomonas	0.005	0.006			Larkinella	13	0.914	1	ns
Secundilactobacillus	0.005	0.005			Lawsonia	13	0.914	1	ns
Thermotomaculum	0.005	0.005			Leptodesmis	13	0.914	1	ns
Pseudogulbenkiania	0.005	0.006			Leptolyngbya	11	0.914	1	ns
Nanchangia	0.005	0.006			Leucobacter	11	0.914	1	ns
Oerskovia	0.005	0.005			Lichenicola	11	0.914	1	ns
Sandaracinobacter	0.005	0.005			Limihaloglobus	11	0.914	1	ns
Acidibrevibacterium	0.005	0.005			Limnochorda	11	0.914	1	ns
Pseudorhodoplanes	0.005	0.005			Listeria	13	0.914	1	ns
Paraurantiacibacter	0.005	0.005			Luteimicrobium	13	0.914	1	ns
Petrotoga	0.005	0.005			Lysinibacillus	11	0.914	1	ns
Salimicrobium	0.005	0.005			Mahella	11	0.914	1	ns
Sideroxydans	0.005	0.005			Mammaliicoccus	13	0.914	1	ns
Gulosibacter	0.005	0.005			Maribacter	13	0.914	1	ns
Lawsonia	0.005	0.004			Maribius	11	0.914	1	ns
Weeksella	0.005	0.006			Marinicauda	11	0.914	1	ns
Georhizobium	0.005	0.005			Marinithermus	11	0.914	1	ns
Mameliella	0.005	0.006			Marinobacter	11	0.914	1	ns
Terrihabitans	0.005	0.004			Marmoricola	11	0.914	1	ns
Gynuella	0.005	0.005			Martelella	13	0.914	1	ns
Pelagibacterium	0.005	0.004			Mesorhizobium	11	0.914	1	ns
Methanotorris	0.005	0.004			Metabacillus	13	0.914	1	ns
Microvirgula	0.005	0.006			Methanobacterium	13	0.914	1	ns
Pengzhenrongella	0.005	0.006			Methanococcoides	11	0.914	1	ns
Rickettsiella	0.005	0.003			Methanohalophilus	11	0.914	1	ns
Salipaludibacillus	0.005	0.005			Methanolobus	11	0.914	1	ns
Candidatus_Nitrotoga	0.005	0.004			Methanosphaera	11	0.914	1	ns
Occultella	0.005	0.006			Methanotorris	11	0.914	1	ns
Poriferisphaera	0.005	0.004			Methylococcus	13	0.914	1	ns
Agarilytica	0.005	0.006			Methylogaea	11	0.914	1	ns
Denitrovibrio	0.005	0.005			Methylomagnum	11	0.914	1	ns
Maricaulis	0.005	0.004			Methylomicrobium	13	0.914	1	ns
Rippkaea	0.005	0.004			Methylovirgula	11	0.914	1	ns
Salinivibrio	0.005	0.006			Methylovorus	11	0.914	1	ns
Desulfurobacterium	0.005	0.004			Microcella	13	0.914	1	ns
Luteimicrobium	0.005	0.005			Microvenator	13	0.914	1	ns
Luteithermobacter	0.005	0.005			Microvirgula	11	0.914	1	ns
Pyrococcus	0.005	0.006			Moraxella	13	0.914	1	ns
Snodgrassella	0.005	0.004			Morganella	13	0.914	1	ns
Desulfomonile	0.005	0.005			Musicola	11	0.914	1	ns
Halapricum	0.005	0.005			Mycetocola	11	0.914	1	ns
Halotalea	0.005	0.005			Mycolicibacter	11	0.914	1	ns
Hylemonella	0.005	0.006			Mycoplasmopsis	13	0.914	1	ns
Methanoregula	0.005	0.005			Nanobdella	11	0.914	1	ns
Phototrophicus	0.005	0.005			Natranaerofaba	11	0.914	1	ns
Methyloligella	0.005	0.005			Natribaculum	13	0.914	1	ns
Aerosticca	0.005	0.005			Natronococcus	11	0.914	1	ns
Fuscovulum	0.005	0.005			Nautilia	13	0.914	1	ns
Kerstersia	0.005	0.005			Neochlamydia	11	0.914	1	ns
Magnetococcus	0.005	0.004			Nesterenkonia	13	0.914	1	ns
Anaplasma	0.005	0.005			Niallia	11	0.914	1	ns
Loktanella	0.005	0.005			Nissabacter	11	0.914	1	ns
Atribacter	0.005	0.003			Nitrincola	13	0.914	1	ns
Commensalibacter	0.005	0.004			Nitrosarchaeum	11	0.914	1	ns
Oricola	0.005	0.006			Nitrospirillum	13	0.914	1	ns
Simplicispira	0.005	0.004			Nodularia	13	0.914	1	ns
Basfia	0.005	0.004			Nonlabens	11	0.914	1	ns
Dongshaea	0.005	0.004			Novosphingopyxis	13	0.914	1	ns
Frigoribacterium	0.005	0.004			Oceanisphaera	13	0.914	1	ns
Adhaeretor	0.005	0.005			Oryzomicrobium	13	0.914	1	ns
Crinalium	0.005	0.006			Ottowia	13	0.914	1	ns
Haematobacter	0.005	0.005			Parabacteroides	13	0.914	1	ns
Blastomonas	0.005	0.005			Paracholeplasma	11	0.914	1	ns
Pistricoccus	0.005	0.006			Parafannyhessea	11	0.914	1	ns
Paralcaligenes	0.005	0.005			Parascardovia	13	0.914	1	ns
Candidatus_Vesicomyosocius	0.005	0.006			Parasphingorhabdus	13	0.914	1	ns
Dissulfurispira	0.005	0.004			Paraurantiacibacter	13	0.914	1	ns
Silicimonas	0.005	0.005			Parvicella	13	0.914	1	ns
Oligella	0.005	0.005			Paucibacter	13	0.914	1	ns
Candidatus_Hamiltonella	0.005	0.005			Pauljensenia	13	0.914	1	ns
Constantimarinum	0.005	0.005			Pediococcus	13	0.914	1	ns
Ferroplasma	0.005	0.004			Pedococcus	13	0.914	1	ns
Halomicronema	0.005	0.005			Pelagovum	13	0.914	1	ns
Iodobacter	0.005	0.004			Pelobacter	13	0.914	1	ns
Leptodesmis	0.005	0.005			Pelolinea	13	0.914	1	ns
Austwickia	0.005	0.005			Pelosinus	13	0.914	1	ns
Oceanisphaera	0.005	0.005			Persicimonas	13	0.914	1	ns
Pseudolysobacter	0.005	0.005			Petrotoga	13	0.914	1	ns
Desulfobacca	0.005	0.006			Phascolarctobacterium	11	0.914	1	ns
Geodermatophilus	0.005	0.006			Phocaeicola	11	0.914	1	ns
Actinopolyspora	0.005	0.005			Phreatobacter	11	0.914	1	ns
Mumia	0.005	0.005			Phycicoccus	11	0.914	1	ns
Ponticoccus	0.005	0.005			Phyllobacterium	13	0.914	1	ns
Roseitalea	0.005	0.005			Phytohabitans	13	0.914	1	ns
Epidermidibacterium	0.005	0.004			Pirellulimonas	13	0.914	1	ns
Mycoavidus	0.005	0.004			Polycladomyces	11	0.914	1	ns
Pseudactinotalea	0.005	0.004			Polymorphospora	13	0.914	1	ns
Sediminibacillus	0.005	0.004			Poseidonibacter	11	0.914	1	ns
Anthocerotibacter	0.005	0.005			Pradoshia	13	0.914	1	ns
Methylovorus	0.005	0.005			Prevotella	11	0.914	1	ns
Flexistipes	0.005	0.005			Priestia	13	0.914	1	ns
Candidatus_Bipolaricaulis	0.005	0.005			Prochlorococcus	13	0.914	1	ns
Candidatus_Deianiraea	0.005	0.004			Pseudactinotalea	11	0.914	1	ns
Halorientalis	0.005	0.006			Pseudoclavibacter	11	0.914	1	ns
Symbiopectobacterium	0.005	0.004			Pseudoleptotrichia	11	0.914	1	ns
Yimella	0.005	0.006			Pseudoprevotella	13	0.914	1	ns
Acidothermus	0.005	0.004			Pusillimonas	13	0.914	1	ns
Pseudooceanicola	0.005	0.005			Radiobacillus	11	0.914	1	ns
Quatrionicoccus	0.005	0.005			Raineyella	13	0.914	1	ns
Reinekea	0.005	0.005			Rathayibacter	13	0.914	1	ns
Candidatus_Tachikawaea	0.005	0.004			Rhizobium	11	0.914	1	ns
Dissulfurimicrobium	0.005	0.004			Rhodanobacter	13	0.914	1	ns
Jejubacter	0.005	0.004			Rhodococcus	11	0.914	1	ns
Gallibacterium	0.005	0.004			Rhodomicrobium	11	0.914	1	ns
Rubripirellula	0.005	0.005			Rhodoplanes	13	0.914	1	ns
Terricaulis	0.005	0.005			Rhodovastum	13	0.914	1	ns
Actinobaculum	0.005	0.005			Rickettsia	13	0.914	1	ns
Glycocaulis	0.004	0.004			Riemerella	11	0.914	1	ns
Methanohalophilus	0.004	0.005			Roseburia	13	0.914	1	ns
Methylobacillus	0.004	0.005			Roseimicrobium	13	0.914	1	ns
Neoasaia	0.004	0.005			Roseobacter	13	0.914	1	ns
Scardovia	0.004	0.004			Roseovarius	11	0.914	1	ns
Calycomorphotria	0.004	0.006			Ruania	13	0.914	1	ns
Candidatus_Phycorickettsia	0.004	0.004			Ruegeria	13	0.914	1	ns
Candidatus_Riesia	0.004	0.004			Rufibacter	11	0.914	1	ns
Mangrovibacillus	0.004	0.005			Ruficoccus	13	0.914	1	ns
Rouxiella	0.004	0.004			Rugosibacter	13	0.914	1	ns
Candidatus_Nanopelagicus	0.004	0.004			Sabulilitoribacter	11	0.914	1	ns
Cylindrospermum	0.004	0.003			Salinicoccus	11	0.914	1	ns
Lacimicrobium	0.004	0.003			Salinispira	11	0.914	1	ns
Novosphingopyxis	0.004	0.004			Salinispora	13	0.914	1	ns
Mariniblastus	0.004	0.005			Salipaludibacillus	13	0.914	1	ns
Roseicitreum	0.004	0.004			Sarcina	11	0.914	1	ns
Candidatus_Hodgkinia	0.004	0.003			Sediminibacillus	13	0.914	1	ns
Chloroherpeton	0.004	0.005			Serinicoccus	13	0.914	1	ns
Dinoroseobacter	0.004	0.005			Silvanigrella	11	0.914	1	ns
Fructobacillus	0.004	0.004			Simonsiella	11	0.914	1	ns
Phytobacter	0.004	0.004			Sodaliphilus	13	0.914	1	ns
Marmoricola	0.004	0.005			Solimonas	11	0.914	1	ns
Bacteriovorax	0.004	0.005			Solitalea	11	0.914	1	ns
Gryllotalpicola	0.004	0.005			Sorangium	13	0.914	1	ns
Periweissella	0.004	0.003			Sphaerobacter	13	0.914	1	ns
Croceibacterium	0.004	0.004			Sphingobacterium	13	0.914	1	ns
Maribius	0.004	0.004			Sphingorhabdus	13	0.914	1	ns
Verrucosispora	0.004	0.005			Spiribacter	13	0.914	1	ns
Methanocorpusculum	0.004	0.005			Spiroplasma	11	0.914	1	ns
Peteryoungia	0.004	0.004			Staphylospora	13	0.914	1	ns
Candidatus_Schneideria	0.004	0.004			Stella	13	0.914	1	ns
Hankyongella	0.004	0.004			Stigmatella	11	0.914	1	ns
Humibacter	0.004	0.005			Streptacidiphilus	11	0.914	1	ns
Candidatus_Cloacimonas	0.004	0.003			Streptococcus	13	0.914	1	ns
Chitinolyticbacter	0.004	0.005			Streptomyces	11	0.914	1	ns
Methylobacter	0.004	0.004			Sulfitobacter	13	0.914	1	ns
Pontibrevibacter	0.004	0.004			Sulfuracidifex	13	0.914	1	ns
Terasakiella	0.004	0.004			Sulfuricella	13	0.914	1	ns
Brevirhabdus	0.004	0.004			Sulfurivermis	11	0.914	1	ns
Candidatus_Gullanella	0.004	0.003			Sutcliffiella	13	0.914	1	ns
Pseudohongiella	0.004	0.006			Syntrophothermus	13	0.914	1	ns
Bythopirellula	0.004	0.005			Syntrophus	13	0.914	1	ns
Oceanicola	0.004	0.005			Taylorella	13	0.914	1	ns
Saccharospirillum	0.004	0.004			Telmatocola	11	0.914	1	ns
Chromohalobacter	0.004	0.004			Tenacibaculum	13	0.914	1	ns
Methylovulum	0.004	0.005			Tenuifilum	11	0.914	1	ns
Archaeoglobus	0.004	0.004			Tepidimonas	13	0.914	1	ns
Chryseoglobus	0.004	0.004			Tepiditoga	13	0.914	1	ns
Allosaccharopolyspora	0.004	0.004			Terricaulis	11	0.914	1	ns
Arenimonas	0.004	0.005			Terriglobus	11	0.914	1	ns
Pauljensenia	0.004	0.003			Terrisporobacter	13	0.914	1	ns
Pulveribacter	0.004	0.005			Thalassoglobus	11	0.914	1	ns
Tardibacter	0.004	0.003			Thalassotalea	13	0.914	1	ns
Auritidibacter	0.004	0.004			Thermanaerovibrio	13	0.914	1	ns
Lawsonella	0.004	0.004			Thermoanaerobacterium	13	0.914	1	ns
Pedococcus	0.004	0.004			Thermoplasma	11	0.914	1	ns
Pseudopuniceibacterium	0.004	0.005			Thermosipho	11	0.914	1	ns
Vespertiliibacter	0.004	0.003			Thermotomaculum	11	0.914	1	ns
Persephonella	0.004	0.004			Thermus	13	0.914	1	ns
Beggiatoa	0.004	0.003			Thioflavicoccus	11	0.914	1	ns
Natribaculum	0.004	0.004			Thiomicrorhabdus	11	0.914	1	ns
Aureliella	0.004	0.004			Truepera	11	0.914	1	ns
Desulfotalea	0.004	0.004			Tsukamurella	11	0.914	1	ns
Limnospira	0.004	0.003			Turicibacter	13	0.914	1	ns
Luteipulveratus	0.004	0.005			Urbifossiella	13	0.914	1	ns
Oxynema	0.004	0.004			Vagococcus	13	0.914	1	ns
Congregibacter	0.004	0.004			Xylella	11	0.914	1	ns
Oceanicoccus	0.004	0.003			Zobellella	11	0.914	1	ns
Pacificitalea	0.004	0.004			Zymomonas	13	0.914	1	ns
Thermosulfidibacter	0.004	0.003			Abyssicoccus	12	1	1	ns
Sideroxyarcus	0.004	0.005			Acetohalobium	12	1	1	ns
Candidatus_Fukatsuia	0.004	0.003			Acidothermus	12	1	1	ns
Kozakia	0.004	0.003			Actinocatenispora	12	1	1	ns
Pelistega	0.004	0.004			Actinomarinicola	12	1	1	ns
Parasaccharibacter	0.004	0.005			Actinopolyspora	12	1	1	ns
Hydrocarboniclastica	0.004	0.004			Adhaeribacter	12	1	1	ns
Leptothermofonsia	0.004	0.003			Ahniella	12	1	1	ns
Candidatus_Desulfofervidus	0.004	0.004			Akkermansia	12	1	1	ns
Halorhabdus	0.004	0.004			Allocoleopsis	12	1	1	ns
Tritonibacter	0.004	0.005			Allokutzneria	12	1	1	ns
Actinotalea	0.004	0.004			Anaerobutyricum	12	1	1	ns
Rhodopirellula	0.004	0.004			Anaerolinea	12	1	1	ns
Paremcibacter	0.004	0.004			Anatilimnocola	12	1	1	ns
Aquisediminimonas	0.004	0.003			Antarctobacter	12	1	1	ns
Cycloclasticus	0.004	0.004			Apilactobacillus	12	1	1	ns
Gymnodinialimonas	0.004	0.005			Aquisphaera	12	1	1	ns
Haematospirillum	0.004	0.004			Arabiibacter	12	1	1	ns
Frederiksenia	0.004	0.002			Aurantimonas	12	1	1	ns
Haloglomus	0.004	0.003			Azotobacter	12	1	1	ns
Marisediminicola	0.004	0.004			Belliella	12	1	1	ns
Gallionella	0.004	0.004			Bergeyella	12	1	1	ns
Halomarina	0.004	0.004			Bisgaardia	12	1	1	ns
Hydrogenophilus	0.004	0.003			Brevefilum	12	1	1	ns
Methylotenera	0.004	0.004			Brucella	12	1	1	ns
Neorickettsia	0.004	0.003			Burkholderia	12	1	1	ns
Zymobacter	0.004	0.004			Caldichromatium	12	1	1	ns
Candidatus_Phaeomarinobacter	0.004	0.004			Caloranaerobacter	12	1	1	ns
Granulosicoccus	0.004	0.004			Candidatus_Bipolaricaulis	12	1	1	ns
Paraoerskovia	0.004	0.003			Candidatus_Carsonella	12	1	1	ns
Suicoccus	0.004	0.003			Candidatus_Pelagibacter	12	1	1	ns
Conchiformibius	0.004	0.003			Candidatus_Planktophila	12	1	1	ns
Thalassococcus	0.004	0.005			Candidatus_Profftella	12	1	1	ns
Gilvimarinus	0.004	0.004			Candidatus_Sulfidibacterium	12	1	1	ns
Euhalothece	0.004	0.002			Candidatus_Tachikawaea	12	1	1	ns
Citromicrobium	0.004	0.004			Candidatus_Uabimicrobium	12	1	1	ns
Agreia	0.004	0.003			Candidatus_Xiphinematobacter	12	1	1	ns
Otariodibacter	0.004	0.003			Carboxydothermus	12	1	1	ns
Candidatus_Chromulinivorax	0.004	0.003			Carnobacterium	12	1	1	ns
Chitinibacter	0.004	0.004			Catenovulum	12	1	1	ns
Salinispora	0.004	0.003			Cellvibrio	12	1	1	ns
Allocoleopsis	0.004	0.004			Chitinophaga	12	1	1	ns
Aquaspirillum	0.004	0.004			Ciceribacter	12	1	1	ns
Glaciihabitans	0.004	0.005			Cobetia	12	1	1	ns
Picrophilus	0.004	0.003			Crateriforma	12	1	1	ns
Dermatophilus	0.004	0.004			Cronobacter	12	1	1	ns
Flocculibacter	0.004	0.003			Cyanobium	12	1	1	ns
Natronoglycomyces	0.004	0.003			Deinococcus	12	1	1	ns
Novacetimonas	0.004	0.004			Denitratisoma	12	1	1	ns
Acetilactobacillus	0.004	0.004			Desulfatibacillum	12	1	1	ns
Desulfocapsa	0.004	0.004			Desulfocurvibacter	12	1	1	ns
Oecophyllibacter	0.004	0.003			Desulfoluna	12	1	1	ns
Thaumasiovibrio	0.004	0.002			Desulfosediminicola	12	1	1	ns
Caldisericum	0.004	0.004			Dokdonella	12	1	1	ns
Nitrincola	0.003	0.003			Duncaniella	12	1	1	ns
Candidatus_Nasuia	0.003	0.003			Egibacter	12	1	1	ns
Pleurocapsa	0.003	0.003			Elizabethkingia	12	1	1	ns
Changpingibacter	0.003	0.004			Empedobacter	12	1	1	ns
Permianibacter	0.003	0.004			Entomomonas	12	1	1	ns
Simonsiella	0.003	0.003			Finegoldia	12	1	1	ns
Cognaticolwellia	0.003	0.004			Flavisolibacter	12	1	1	ns
Ignavigranum	0.003	0.004			Friedmanniella	12	1	1	ns
Gallaecimonas	0.003	0.003			Geminocystis	12	1	1	ns
Maritalea	0.003	0.004			Geovibrio	12	1	1	ns
Salarchaeum	0.003	0.002			Gilvibacter	12	1	1	ns
Candidatus_Paracaedibacter	0.003	0.003			Gloeomargarita	12	1	1	ns
Jannaschia	0.003	0.003			Gluconacetobacter	12	1	1	ns
Oleiphilus	0.003	0.003			Gudongella	12	1	1	ns
Allobranchiibius	0.003	0.004			Halioglobus	12	1	1	ns
Limnobacter	0.003	0.003			Halobacteriovorax	12	1	1	ns
Nitrososphaera	0.003	0.003			Halosegnis	12	1	1	ns
Roseibacterium	0.003	0.003			Halothece	12	1	1	ns
Shimwellia	0.003	0.003			Herbaspirillum	12	1	1	ns
Tateyamaria	0.003	0.004			Hippea	12	1	1	ns
Metallosphaera	0.003	0.003			Hirschia	12	1	1	ns
Natronococcus	0.003	0.003			Hylemonella	12	1	1	ns
Fluviibacter	0.003	0.004			Hypericibacter	12	1	1	ns
Fannyhessea	0.003	0.004			Ignavibacterium	12	1	1	ns
Methanosalsum	0.003	0.003			Iodobacter	12	1	1	ns
Skermania	0.003	0.003			Isoptericola	12	1	1	ns
Yoonia	0.003	0.003			Jatrophihabitans	12	1	1	ns
Paraneptunicella	0.003	0.003			Kitasatospora	12	1	1	ns
Pseudobdellovibrio	0.003	0.003			Kushneria	12	1	1	ns
Sulfuricurvum	0.003	0.003			Labilithrix	12	1	1	ns
Candidatus_Puniceispirillum	0.003	0.002			Lachnoclostridium	12	1	1	ns
Catenovulum	0.003	0.003			Lacunisphaera	12	1	1	ns
Neochlamydia	0.003	0.002			Lancefieldella	12	1	1	ns
Pseudescherichia	0.003	0.003			Lawsonella	12	1	1	ns
Amphritea	0.003	0.003			Leadbetterella	12	1	1	ns
Beijerinckia	0.003	0.004			Liberibacter	12	1	1	ns
Hydrogenobacter	0.003	0.003			Limnoglobus	12	1	1	ns
Marinagarivorans	0.003	0.003			Luteolibacter	12	1	1	ns
Candidatus_Reidiella	0.003	0.005			Macrococcus	12	1	1	ns
Candidatus_Ruthia	0.003	0.003			Mangrovivirga	12	1	1	ns
Neomicrococcus	0.003	0.004			Maridesulfovibrio	12	1	1	ns
Thalassobius	0.003	0.003			Marisediminicola	12	1	1	ns
Ewingella	0.003	0.003			Massilistercora	12	1	1	ns
Hippea	0.003	0.003			Mediterraneibacter	12	1	1	ns
Aminobacterium	0.003	0.003			Megasphaera	12	1	1	ns
Hydrogenobaculum	0.003	0.003			Melaminivora	12	1	1	ns
Candidatus_Xiphinematobacter	0.003	0.003			Melissococcus	12	1	1	ns
Formicincola	0.003	0.004			Melittangium	12	1	1	ns
Rugosibacter	0.003	0.003			Methanobrevibacter	12	1	1	ns
Halanaeroarchaeum	0.003	0.002			Methanoplanus	12	1	1	ns
Mycetohabitans	0.003	0.003			Methanothrix	12	1	1	ns
Candidatus_Nitrosotenuis	0.003	0.002			Methylacidiphilum	12	1	1	ns
Devriesea	0.003	0.003			Microcoleus	12	1	1	ns
Gloeomargarita	0.003	0.003			Microcystis	12	1	1	ns
Athalassotoga	0.003	0.003			Mobiluncus	12	1	1	ns
Phormidium	0.003	0.003			Modestobacter	12	1	1	ns
Pseudohalocynthiibacter	0.003	0.003			Mumia	12	1	1	ns
Candidatus_Azoamicus	0.003	0.002			Mycobacterium	12	1	1	ns
Parasedimentitalea	0.003	0.003			Neoasaia	12	1	1	ns
Stygiolobus	0.003	0.003			Nitratireductor	12	1	1	ns
Alkalimarinus	0.003	0.003			Nitrobacter	12	1	1	ns
Amylolactobacillus	0.003	0.003			Nitrosospira	12	1	1	ns
Boudabousia	0.003	0.003			Nocardia	12	1	1	ns
Candidatus_Ishikawaella	0.003	0.003			Nordella	12	1	1	ns
Fluoribacter	0.003	0.004			Nosocomiicoccus	12	1	1	ns
Hirschia	0.003	0.003			Noviherbaspirillum	12	1	1	ns
Litorilituus	0.003	0.002			Oleiharenicola	12	1	1	ns
Thermovirga	0.003	0.003			Olsenella	12	1	1	ns
Falsihalocynthiibacter	0.003	0.002			Oxynema	12	1	1	ns
Paeniglutamicibacter	0.003	0.003			Pannonibacter	12	1	1	ns
Candidatus_Nitrosacidococcus	0.003	0.002			Paradevosia	12	1	1	ns
Candidatus_Purcelliella	0.003	0.003			Paraprevotella	12	1	1	ns
Acetomicrobium	0.003	0.003			Pengzhenrongella	12	1	1	ns
Ectothiorhodosinus	0.003	0.003			Peptoniphilus	12	1	1	ns
Halothece	0.003	0.002			Pikeienuella	12	1	1	ns
Pseudoclavibacter	0.003	0.004			Planctomyces	12	1	1	ns
Candidatus_Ichthyocystis	0.003	0.003			Propionibacterium	12	1	1	ns
Candidatus_Nitrosomarinus	0.003	0.003			Pseudogulbenkiania	12	1	1	ns
Ketobacter	0.003	0.004			Pseudopedobacter	12	1	1	ns
Methanolobus	0.003	0.002			Pyrococcus	12	1	1	ns
Salinirubellus	0.003	0.003			Quatrionicoccus	12	1	1	ns
Candidatus_Steffania	0.003	0.002			Rhodobacter	12	1	1	ns
Aquifex	0.003	0.002			Romboutsia	12	1	1	ns
Filomicrobium	0.003	0.003			Roseomonas	12	1	1	ns
Sulfuracidifex	0.003	0.002			Ruthenibacterium	12	1	1	ns
Methanosphaerula	0.002	0.003			Saccharolobus	12	1	1	ns
Methanomassiliicoccus	0.002	0.003			Salinibacterium	12	1	1	ns
Halarchaeum	0.002	0.003			Salipiger	12	1	1	ns
Candidatus_Midichloria	0.002	0.002			Sebaldella	12	1	1	ns
Lapidilactobacillus	0.002	0.003			Shinella	12	1	1	ns
Salinigranum	0.002	0.002			Slackia	12	1	1	ns
Methanomethylovorans	0.002	0.003			Solidesulfovibrio	12	1	1	ns
Halosegnis	0.002	0.002			Sphingosinithalassobacter	12	1	1	ns
Thalassoglobus	0.002	0.003			Spirosoma	12	1	1	ns
Pajaroellobacter	0.002	0.002			Sporomusa	12	1	1	ns
Vaginimicrobium	0.002	0.002			Stenotrophomonas	12	1	1	ns
Entomobacter	0.002	0.002			Sulfuritortus	12	1	1	ns
Thiosulfatimonas	0.002	0.003			Tannerella	12	1	1	ns
Halobiforma	0.002	0.003			Tepidiforma	12	1	1	ns
Nitrosarchaeum	0.002	0.002			Thermaerobacter	12	1	1	ns
Halogeometricum	0.002	0.003			Thermomonospora	12	1	1	ns
Halomicroarcula	0.002	0.002			Thermophilibacter	12	1	1	ns
Tatlockia	0.002	0.002			Thermosediminibacter	12	1	1	ns
Thermoplasma	0.002	0.002			Thiolapillus	12	1	1	ns
Saliphagus	0.002	0.003			Thiomonas	12	1	1	ns
Methanofervidicoccus	0.002	0.002			Tissierella	12	1	1	ns
Fervidicoccus	0.002	0.002			Tsuneonella	12	1	1	ns
Natronobiforma	0.002	0.002			Turneriella	12	1	1	ns
Candidatus_Nitrosotalea	0.002	0.001			Usitatibacter	12	1	1	ns
Vulcanisaeta	0.001	0.001			Vallitalea	12	1	1	ns
Halopenitus	0.001	0.002			Variovorax	12	1	1	ns
Methanopyrus	0.001	0.001			Verrucomicrobium	12	1	1	ns
					Williamsoniiplasma	12	1	1	ns

## Sheet: Species
Species	Buffalo	Cattle
Prevotella_ruminicola	6.701	6.299
Fibrobacter_succinogenes	5.864	6.22
Prevotella_sp__E2_28	3.164	3.025
Prevotella_sp__E15_22	2.619	2.781
Prevotella_sp__E13_17	1.662	1.662
Prevotella_sp__E9_3	1.527	1.942
Methanobrevibacter_sp__YE315	1.252	1.265
Prevotella_sp__Rep29	0.87	0.854
Prevotella_dentalis	0.666	0.712
Prevotella_bryantii	0.645	0.575
Methanobrevibacter_millerae	0.644	0.755
Prevotella_copri	0.632	0.675
Dysosmobacter_sp__Marseille_Q4140	0.601	0.435
Methanobrevibacter_olleyae	0.561	0.496
Flavonifractor_plautii	0.535	0.441
Methanobrevibacter_ruminantium	0.488	0.494
Pseudobutyrivibrio_xylanivorans	0.481	0.343
Sodaliphilus_pleomorphus	0.467	0.511
Dysosmobacter_welbionis	0.428	0.292
Prevotella_sp__E13_3	0.427	0.446
Faecalibacterium_prausnitzii	0.426	0.412
Butyrivibrio_proteoclasticus	0.4	0.347
Prevotella_sp__E2_25	0.391	0.412
Ruminococcus_albus	0.387	0.48
Prevotella_melaninogenica	0.373	0.392
Butyrivibrio_fibrisolvens	0.37	0.333
Clostridium_botulinum	0.358	2.064
Flintibacter_sp__KGMB00164	0.351	0.307
Vescimonas_coprocola	0.348	0.284
Pseudoprevotella_muciniphila	0.346	0.363
Oscillibacter_sp__NSJ_62	0.334	0.261
Prevotella_denticola	0.318	0.344
Butyrivibrio_hungatei	0.312	0.294
Vescimonas_fastidiosa	0.299	0.245
Prevotella_multiformis	0.243	0.267
Pusillibacter_faecalis	0.241	0.152
Intestinimonas_butyriciproducens	0.24	0.207
Prevotella_intermedia	0.239	0.249
Succinivibrio_dextrinosolvens	0.237	0.212
Prevotella_sp__oral_taxon_475	0.229	0.246
Selenomonas_ruminantium	0.225	0.19
Ruminococcus_champanellensis	0.218	0.228
Prevotella_buccalis	0.206	0.216
Barnesiella_viscericola	0.204	0.221
Ruthenibacterium_lactatiformans	0.197	0.196
Acutalibacter_muris	0.197	0.177
Buchnera_aphidicola	0.19	0.172
Christensenella_sp__Marseille_P3954	0.189	0.193
Alistipes_megaguti	0.187	0.203
Alistipes_onderdonkii	0.187	0.207
Paraprevotella_xylaniphila	0.177	0.182
Clostridium_perfringens	0.166	0.157
Prevotella_oris	0.163	0.165
Tannerella_serpentiformis	0.163	0.178
Alistipes_finegoldii	0.162	0.173
Ruminococcus_bovis	0.162	0.222
Stutzerimonas_stutzeri	0.161	0.039
Phocaeicola_salanitronis	0.161	0.162
Simiaoa_sunii	0.16	0.163
Blattabacterium_cuenoti	0.159	0.15
Alistipes_senegalensis	0.158	0.174
Alistipes_communis	0.157	0.177
Muribaculum_gordoncarteri	0.154	0.166
Ruminococcus_sp__FMBCY1	0.153	0.157
Methanobrevibacter_smithii	0.15	0.165
Prevotella_fusca	0.149	0.156
Bacteroides_thetaiotaomicron	0.148	0.15
Prevotella_enoeca	0.146	0.162
Alistipes_dispar	0.145	0.164
Slackia_heliotrinireducens	0.142	0.15
Muribaculum_intestinale	0.138	0.153
Bacteroides_heparinolyticus	0.134	0.126
Bacteroides_fragilis	0.131	0.145
Alistipes_shahii	0.13	0.151
Bacteroides_zoogleoformans	0.128	0.131
Bacteroides_stercoris	0.126	0.136
Porphyromonas_sp__oral_taxon_275	0.123	0.141
Duncaniella_dubosii	0.122	0.129
Anaerotruncus_colihominis	0.12	0.11
Ruminococcus_bicirculans	0.12	0.108
Alistipes_indistinctus	0.118	0.132
Calothrix_parasitica	0.117	0.076
Prevotella_jejuni	0.116	0.122
Ethanoligenens_harbinense	0.115	0.102
Collinsella_aerofaciens	0.114	0.118
Clostridium_sp__SY8519	0.113	0.117
Lachnoclostridium_phocaeense	0.111	0.113
Bacteroides_eggerthii	0.11	0.117
Phocaeicola_coprophilus	0.11	0.118
Massilistercora_timonensis	0.109	0.11
Faecalibacterium_sp__I3389	0.108	0.104
Bacteroides_uniformis	0.105	0.106
Clostridium_scindens	0.105	0.107
Roseburia_hominis	0.104	0.102
Caproiciproducens_sp__NJN_50	0.104	0.096
Olsenella_timonensis	0.103	0.102
Prevotella_nigrescens	0.101	0.101
Bacteroides_helcogenes	0.098	0.107
Fusobacterium_nucleatum	0.098	0.089
Clostridioides_difficile	0.098	0.091
Parafannyhessea_umbonata	0.097	0.098
Prevotella_herbatica	0.097	0.102
Enterocloster_bolteae	0.097	0.096
Methanobrevibacter_sp__TLL_48_HuF1	0.097	0.107
Solibaculum_mannosilyticum	0.096	0.087
Tannerella_forsythia	0.094	0.097
Hungatella_hathewayi	0.094	0.089
Akkermansia_muciniphila	0.089	0.086
Anaerobutyricum_hallii	0.088	0.083
Parabacteroides_goldsteinii	0.088	0.088
Parabacteroides_distasonis	0.088	0.093
Clostridium_butyricum	0.086	0.075
Sorangium_cellulosum	0.084	0.085
Alistipes_sp__dk3624	0.084	0.088
Acidaminococcus_fermentans	0.083	0.083
Roseburia_intestinalis	0.081	0.077
Porphyromonas_gingivalis	0.08	0.089
Petrimonas_mucosa	0.08	0.086
Pyramidobacter_piscolens	0.08	0.084
Emergencia_timonensis	0.079	0.077
Dorea_longicatena	0.078	0.072
Caproicibacter_fermentans	0.078	0.072
Bacteroides_salyersiae	0.078	0.081
Wansuia_hejianensis	0.077	0.079
Enterococcus_faecalis	0.076	0.059
Fischerella_sp__NIES_4106	0.075	0.045
Prevotella_histicola	0.075	0.078
Clostridium_sp__M62_1	0.075	0.074
Christensenella_minuta	0.075	0.074
Bacteroides_sp__CBA7301	0.074	0.082
Olsenella_uli	0.074	0.078
Xanthomonas_citri	0.074	0.044
Caproicibacterium_amylolyticum	0.074	0.071
Prevotella_veroralis	0.074	0.074
Lachnospira_eligens	0.072	0.067
Qiania_dongpingensis	0.072	0.076
Blautia_producta	0.072	0.071
Parabacteroides_merdae	0.071	0.075
Clostridium_beijerinckii	0.071	0.061
Eggerthella_lenta	0.07	0.073
Bacillus_cereus	0.069	0.16
Bacteroides_caccae	0.069	0.068
Methanosphaera_sp__BMS	0.068	0.062
Clostridium_hylemonae	0.068	0.065
Berryella_intestinalis	0.067	0.069
Phocaeicola_vulgatus	0.065	0.068
Clostridium_pasteurianum	0.065	0.056
Blautia_obeum	0.064	0.063
Arabiibacter_massiliensis	0.064	0.066
Caproicibacterium_lactatifermentans	0.063	0.051
Selenomonas_sputigena	0.063	0.055
Porphyromonas_asaccharolytica	0.062	0.067
Bacteroides_nordii	0.062	0.064
Bacteroides_faecis	0.062	0.061
Coprococcus_catus	0.061	0.061
Paeniclostridium_sordellii	0.061	0.056
Clostridium_saccharoperbutylacetonicum	0.061	0.053
Treponema_succinifaciens	0.061	0.038
Parabacteroides_faecis	0.06	0.068
Tenuifilum_thalassicum	0.06	0.065
Blautia_pseudococcoides	0.06	0.058
Raoultibacter_timonensis	0.06	0.066
Faecalibacterium_sp__HTFF	0.06	0.059
Escherichia_coli	0.06	0.053
Thermophilibacter_immobilis	0.06	0.06
Blautia_sp__NBRC_113351	0.058	0.061
Denitrobacterium_detoxificans	0.058	0.065
Prevotella_scopos	0.058	0.055
Bacteroides_intestinalis	0.057	0.062
Bacteroides_zhangwenhongii	0.056	0.057
Ruminococcus_gnavus	0.056	0.056
Coprococcus_comes	0.056	0.054
Prevotella_sp__oral_taxon_299	0.055	0.06
Bacteroides_cellulosilyticus	0.055	0.06
Bacteroides_xylanisolvens	0.055	0.059
Clostridium_baratii	0.055	0.049
Ruminococcus_torques	0.054	0.05
Candidatus_Methanomethylophilus_alvus	0.053	0.06
Collinsella_stercoris	0.053	0.053
Fretibacterium_fastidiosum	0.053	0.051
Priestia_megaterium	0.053	0.047
Clostridium_sporogenes	0.053	0.045
Nostoc_sp__C052	0.053	0.034
Xanthomonas_campestris	0.052	0.033
Candidatus_Sulfidibacterium_hydrothermale	0.052	0.049
Methanobrevibacter_sp__AbM4	0.051	0.059
Paraclostridium_bifermentans	0.051	0.044
Bacillus_thuringiensis	0.05	0.047
Anaerostipes_hadrus	0.05	0.043
Lacrimispora_sphenoides	0.05	0.047
Clostridium_gelidum	0.049	0.043
Comamonas_aquatica	0.049	0.012
Fusobacterium_necrophorum	0.049	0.045
Lysobacter_capsici	0.048	0.034
Parolsenella_massiliensis	0.048	0.05
Parabacteroides_johnsonii	0.048	0.052
Sellimonas_intestinalis	0.048	0.047
Staphylococcus_aureus	0.048	0.044
Prochlorococcus_marinus	0.047	0.048
Adlercreutzia_equolifaciens	0.047	0.048
Lachnoanaerobaculum_umeaense	0.047	0.047
Candidatus_Erwinia_haradaeae	0.047	0.038
Paludibacter_propionicigenes	0.047	0.057
Symbiobacterium_thermophilum	0.047	0.046
Lachnoclostridium_phytofermentans	0.047	0.042
Porphyromonas_cangingivalis	0.046	0.054
Helicobacter_pylori	0.046	0.041
Megasphaera_elsdenii	0.046	0.049
Proteiniphilum_saccharofermentans	0.046	0.05
Faecalibacillus_intestinalis	0.046	0.043
Cloacibacillus_porcorum	0.046	0.048
Desulfovibrio_piger	0.046	0.054
Pontibacter_russatus	0.046	0.049
Clostridium_argentinense	0.045	0.041
Olsenella_sp__oral_taxon_807	0.045	0.045
Desulfovibrio_desulfuricans	0.045	0.045
Eggerthella_guodeyinii	0.044	0.049
Bacillus_mycoides	0.044	0.039
Nostoc_sp__CE0543	0.044	0.03
Lacrimispora_saccharolytica	0.044	0.045
Clostridium_kluyveri	0.044	0.038
Acetivibrio_thermocellus	0.043	0.052
Clostridium_tetani	0.043	0.036
Treponema_peruense	0.043	0.036
Faecalibacterium_sp__I3333	0.043	0.039
Clostridium_saccharobutylicum	0.043	0.038
Parolsenella_catena	0.042	0.044
Anaerocolumna_sedimenticola	0.042	0.038
Methanobrevibacter_arboriphilus	0.042	0.041
Coprococcus_eutactus	0.042	0.038
Clostridium_bornimense	0.042	0.037
Wujia_chipingensis	0.042	0.04
Bacteroides_ovatus	0.042	0.04
Anaerostipes_caccae	0.042	0.04
Clostridium_sp__DL_VIII	0.041	0.039
Paenibacillus_mucilaginosus	0.041	0.039
Phocaeicola_dorei	0.041	0.045
Clostridium_sp__C1	0.041	0.036
Anaerocolumna_chitinilytica	0.041	0.043
Aliarcobacter_cryaerophilus	0.041	0.035
Eubacterium_sp__c_25	0.041	0.037
Rhodothermus_marinus	0.041	0.045
Megasphaera_stantonii	0.041	0.043
Faecalibaculum_rodentium	0.041	0.041
Hymenobacter_busanensis	0.041	0.043
Clostridium_innocuum	0.041	0.037
Pseudoclostridium_thermosuccinogenes	0.041	0.04
Lactobacillus_acetotolerans	0.04	0.052
Erysipelatoclostridium_ramosum	0.04	0.034
Novisyntrophococcus_fermenticellae	0.04	0.038
Terrisporobacter_sp__MCA3	0.04	0.04
Mammaliicoccus_sciuri	0.04	0.038
Blautia_argi	0.04	0.039
Blautia_hansenii	0.039	0.036
Pseudomonas_putida	0.039	0.041
Acinetobacter_baumannii	0.039	0.032
Clostridium_intestinale	0.039	0.032
Faecalicatena_sp__Marseille_Q4148	0.038	0.035
Clostridium_gasigenes	0.038	0.034
Coprococcus_sp__ART55_1	0.038	0.039
Salmonella_enterica	0.038	0.037
Blautia_massiliensis	0.038	0.032
Mageeibacillus_indolicus	0.038	0.042
Phascolarctobacterium_faecium	0.038	0.037
Clostridium_taeniosporum	0.038	0.035
Anaerostipes_rhamnosivorans	0.037	0.036
Fusobacterium_pseudoperiodonticum	0.037	0.033
Fusobacterium_ulcerans	0.037	0.03
Heliomicrobium_modesticaldum	0.037	0.034
Stenotrophomonas_maltophilia	0.037	0.038
Eggerthella_sp__YY7918	0.037	0.037
Faecalibacterium_sp__I4179	0.037	0.036
Monoglobus_pectinilyticus	0.037	0.033
Finegoldia_magna	0.037	0.034
Roseburia_sp__NSJ_69	0.037	0.033
Odoribacter_splanchnicus	0.036	0.038
Chryseolinea_soli	0.036	0.039
Dehalococcoides_mccartyi	0.036	0.019
Clostridium_manihotivorum	0.036	0.035
Clostridium_isatidis	0.036	0.032
Pontibacter_actiniarum	0.036	0.036
Rhodocaloribacter_litoris	0.035	0.042
Pseudomonas_aeruginosa	0.035	0.032
Porphyromonas_somerae	0.035	0.041
Hymenobacter_sp__5317J_9	0.035	0.04
Eubacterium_sp__MSJ_33	0.035	0.032
Sandaracinus_amylolyticus	0.035	0.033
Clostridium_sp__MD294	0.035	0.03
Brachyspira_pilosicoli	0.035	0.033
Vallitalea_guaymasensis	0.035	0.031
Clostridium_cellulovorans	0.034	0.03
Chitinophaga_oryzae	0.034	0.037
Clostridium_septicum	0.034	0.032
Gordonibacter_pamelaeae	0.034	0.036
Anaerocolumna_cellulosilytica	0.033	0.03
Herbinix_luporum	0.033	0.032
Bifidobacterium_longum	0.033	0.035
Gordonibacter_urolithinfaciens	0.033	0.036
Selenomonas_sp__oral_taxon_126	0.033	0.029
Clostridium_colinum	0.033	0.031
Thermobacillus_composti	0.033	0.032
Hymenobacter_sp__PAMC_26554	0.033	0.035
Ligilactobacillus_salivarius	0.033	0.03
Streptococcus_suis	0.032	0.03
Atopobium_sp__oral_taxon_416	0.032	0.033
Lactococcus_lactis	0.032	0.03
Pseudomonas_fluorescens	0.032	0.031
Clostridium_estertheticum	0.032	0.03
Gelria_sp__Kuro_4	0.032	0.032
Kiritimatiella_glycovorans	0.032	0.033
Blautia_liquoris	0.032	0.03
Clostridium_sp__BJN0001	0.032	0.031
Staphylococcus_epidermidis	0.032	0.031
Proteiniphilum_sp__JNU_WLY501	0.032	0.032
Eubacterium_limosum	0.032	0.031
Blautia_sp__SC05B48	0.032	0.031
Agrobacterium_tumefaciens	0.032	0.028
Chitinophaga_sp__XS_30	0.031	0.034
Desulfovibrio_fairfieldensis	0.031	0.033
Sarcina_sp__JB2	0.031	0.028
Streptomyces_venezuelae	0.031	0.032
Treponema_parvum	0.031	0.025
Calothrix_brevissima	0.031	0.021
Anabaena_sp__YBS01	0.031	0.018
Lachnoclostridium_sp__YL32	0.031	0.031
Hymenobacter_monticola	0.031	0.032
Hymenobacter_sp__PAMC_26628	0.031	0.032
Butyricimonas_virosa	0.031	0.034
Hymenobacter_sedentarius	0.031	0.035
Ereboglobus_luteus	0.031	0.032
Tissierella_sp__JN_28	0.031	0.031
Parvimonas_micra	0.031	0.028
Sedimentibacter_sp__zth1	0.03	0.026
Romboutsia_sp__CE17	0.03	0.029
Tepidibacter_sp__8C15b	0.03	0.03
Variovorax_paradoxus	0.03	0.029
Rhodopseudomonas_palustris	0.03	0.033
Megamonas_funiformis	0.03	0.025
Clostridium_novyi	0.03	0.027
Robiginitalea_biformata	0.03	0.035
Weissella_coleopterorum	0.03	0.016
Oceanidesulfovibrio_marinus	0.03	0.03
Fibrella_aestuarina	0.03	0.03
Clostridium_chauvoei	0.029	0.027
Anaerotignum_propionicum	0.029	0.026
Aliarcobacter_butzleri	0.029	0.026
Caloramator_sp__E03	0.029	0.026
Anseongella_ginsenosidimutans	0.029	0.032
Haploplasma_axanthum	0.029	0.026
Ruminiclostridium_herbifermentans	0.029	0.027
Porphyromonas_endodontalis	0.029	0.031
Klebsiella_pneumoniae	0.029	0.025
Bacteroides_caecimuris	0.029	0.028
Brachyspira_hyodysenteriae	0.029	0.026
Rhizobium_leguminosarum	0.029	0.029
Peptacetobacter_hiranonis	0.029	0.028
Rufibacter_radiotolerans	0.028	0.032
Thermoclostridium_stercorarium	0.028	0.027
Treponema_brennaborense	0.028	0.024
Alicyclobacillus_acidocaldarius	0.028	0.027
Clostridium_sp__JN_9	0.028	0.025
Crassaminicella_profunda	0.028	0.024
Archangium_violaceum	0.028	0.029
Clostridium_tyrobutyricum	0.028	0.026
Clostridium_carboxidivorans	0.028	0.024
Romboutsia_hominis	0.028	0.023
Butyricimonas_faecalis	0.028	0.032
Clostridium_cadaveris	0.028	0.026
Methanosphaera_stadtmanae	0.028	0.028
Hymenobacter_sp__APR13	0.028	0.03
Alkaliflexus_sp__Ai_910	0.027	0.029
Clostridium_sp__'deep_sea'	0.027	0.027
Geosporobacter_ferrireducens	0.027	0.026
Selenomonas_sp__oral_taxon_920	0.027	0.024
Opitutus_terrae	0.027	0.027
Tannockella_kyphosi	0.027	0.026
Acetivibrio_clariflavus	0.027	0.024
Hathewaya_histolytica	0.027	0.022
Treponema_denticola	0.027	0.023
Flavobacterium_album	0.027	0.025
Dictyoglomus_thermophilum	0.027	0.022
Clostridium_sp__M3_9	0.027	0.026
Verrucomicrobium_sp__GAS474	0.027	0.027
Coriobacterium_glomerans	0.027	0.028
Clostridium_thermarum	0.027	0.022
Candidatus_Sulcia_muelleri	0.026	0.027
Clostridium_acetobutylicum	0.026	0.021
Salidesulfovibrio_onnuriiensis	0.026	0.028
Streptococcus_equinus	0.026	0.028
Romboutsia_ilealis	0.026	0.023
Candidatus_Promineofilum_breve	0.026	0.03
Crassaminicella_thermophila	0.026	0.021
Aeromonas_hydrophila	0.026	0.024
Staphylococcus_haemolyticus	0.026	0.025
Coprobacter_secundus	0.026	0.026
Morganella_morganii	0.026	0.026
Aminipila_luticellarii	0.026	0.024
Haliangium_ochraceum	0.026	0.026
Hymenobacter_sp__5116S_3	0.026	0.028
Fastidiosipila_sanguinis	0.026	0.026
Selenomonas_timonae	0.026	0.023
Mucilaginibacter_daejeonensis	0.026	0.028
Adlercreutzia_hattorii	0.026	0.028
Hymenobacter_sp__5413J_13	0.026	0.025
Tichowtungia_aerotolerans	0.026	0.026
Clostridium_cochlearium	0.026	0.023
Gemella_haemolysans	0.026	0.025
Treponema_socranskii	0.026	0.018
Streptobacillus_moniliformis	0.025	0.023
Allobaculum_sp__Allo2	0.025	0.026
Paenibacillus_sp__B01	0.025	0.022
Faecalibacterium_sp__I4384	0.025	0.024
Staphylococcus_hominis	0.025	0.021
Enterococcus_faecium	0.025	0.022
Acidaminococcus_intestini	0.025	0.025
Campylobacter_lari	0.025	0.021
Desulfosarcina_ovata	0.025	0.025
Dyadobacter_fermentans	0.025	0.027
Tautonia_plasticadhaerens	0.025	0.026
Alkaliphilus_sp__B6464	0.025	0.023
Desulfocurvibacter_africanus	0.025	0.026
Hymenobacter_sp__BT18	0.025	0.028
Helcococcus_kunzii	0.025	0.022
Saccharibacillus_brassicae	0.025	0.027
Chryseobacterium_indologenes	0.025	0.023
Paenibacillus_sp__RUD330	0.025	0.026
Hymenobacter_nivis	0.025	0.026
Hymenobacter_sp__DG01	0.024	0.027
Mycoplasma_yeatsii	0.024	0.02
Campylobacter_concisus	0.024	0.023
Hymenobacter_sp__5116S_27	0.024	0.027
Paenibacillus_macerans	0.024	0.024
Hymenobacter_oligotrophus	0.024	0.027
Brachyspira_murdochii	0.024	0.02
Hymenobacter_jejuensis	0.024	0.025
Aeromonas_veronii	0.024	0.022
Miniphocaeibacter_halophilus	0.024	0.022
Aquisphaera_giovannonii	0.024	0.025
Flavobacterium_sp__HJ_32_4	0.024	0.026
Hymenobacter_sp__NBH84	0.024	0.024
Pontibacter_akesuensis	0.024	0.026
Desulfobulbus_oralis	0.024	0.022
Gemmatirosa_kalamazoonensis	0.024	0.025
Corynebacterium_xerosis	0.024	0.021
Spirosoma_sp__CJU_R4	0.024	0.024
Bacteroides_coprosuis	0.024	0.027
Lacunisphaera_limnophila	0.024	0.024
Polyangium_aurulentum	0.024	0.023
Rubrobacter_xylanophilus	0.024	0.023
Proteus_mirabilis	0.024	0.02
Capnocytophaga_haemolytica	0.023	0.024
Serratia_marcescens	0.023	0.022
Labilibaculum_antarcticum	0.023	0.023
Allobaculum_mucolyticum	0.023	0.027
Alteracholeplasma_palmae	0.023	0.02
Anaeromyxobacter_sp__Red630	0.023	0.024
Mesoplasma_florum	0.023	0.02
Listeria_monocytogenes	0.023	0.02
Hymenobacter_sp__BRD128	0.023	0.027
Gottschalkia_acidurici	0.023	0.02
Ruficoccus_sp__ZRK36	0.023	0.024
Bifidobacterium_pseudolongum	0.023	0.024
Desulfarculus_baarsii	0.023	0.023
Mycoplasma_mycoides	0.023	0.02
Aminipila_butyrica	0.023	0.024
Desulfuromonas_versatilis	0.023	0.024
Nostoc_sp__NIES_4103	0.023	0.019
Hymenobacter_sp__5420S_77	0.023	0.025
Mucilaginibacter_mali	0.023	0.025
Sphingobacterium_spiritivorum	0.023	0.019
Desulfovibrio_vulgaris	0.023	0.026
Salinibacter_ruber	0.023	0.027
Clostridium_sp__BNL1100	0.023	0.022
Geobacter_sulfurreducens	0.023	0.024
Gramella_echinicola	0.023	0.016
Legionella_pneumophila	0.023	0.019
Megasphaera_massiliensis	0.023	0.024
Pseudodesulfovibrio_mercurii	0.023	0.022
Not_Assigned	0.023	0.02
Clostridium_sp__CM027	0.022	0.022
Peptoniphilus_ivorii	0.022	0.021
Tumebacillus_avium	0.022	0.023
Desulfoluna_sp__ASN36	0.022	0.023
Geomonas_sp__RF6	0.022	0.025
Hymenobacter_swuensis	0.022	0.024
Akkermansia_glycaniphila	0.022	0.023
Aminomonas_paucivorans	0.022	0.023
Nostoc_sp__PCC_7524	0.022	0.015
Luteolibacter_ambystomatis	0.022	0.024
Paenibacillus_polymyxa	0.022	0.019
Hymenobacter_tibetensis	0.022	0.024
Ornithobacterium_rhinotracheale	0.022	0.023
Crassaminicella_sp__143_21	0.022	0.02
Alkalibacter_rhizosphaerae	0.022	0.022
Sphaerospermopsis_kisseleviana	0.022	0.014
Cetobacterium_somerae	0.022	0.02
Paludibaculum_fermentans	0.022	0.026
Corynebacterium_variabile	0.022	0.026
Paenibacillus_lycopersici	0.022	0.02
Hymenobacter_sp__S2_20_2	0.022	0.024
Pseudodesulfovibrio_indicus	0.022	0.023
Niallia_circulans	0.022	0.019
Caulobacter_segnis	0.022	0.024
Clostridium_fermenticellae	0.022	0.02
Maribellus_comscasis	0.022	0.02
Nostoc_sp__UHCC_0870	0.022	0.012
Moorena_producens	0.022	0.022
Thermaerobacter_sp__FW80	0.021	0.021
Fusobacterium_hwasookii	0.021	0.019
Pseudocnuella_soli	0.021	0.021
Pseudomonas_wenzhouensis	0.021	0.002
Cupriavidus_taiwanensis	0.021	0.022
Intestinibaculum_porci	0.021	0.02
Tepiditoga_spiralis	0.021	0.018
Pseudomonas_mendocina	0.021	0.01
Opitutus_sp__GAS368	0.021	0.023
Paenibacillus_albicereus	0.021	0.022
Staphylococcus_xylosus	0.021	0.017
Mogibacterium_pumilum	0.021	0.024
Nocardia_asteroides	0.021	0.023
Desulfuromonas_sp__DDH964	0.021	0.023
Murdochiella_vaginalis	0.021	0.019
Caloranaerobacter_azorensis	0.021	0.02
Haliscomenobacter_hydrossis	0.021	0.024
Thermoanaerobacterium_sp__RBIITD	0.021	0.02
Pectinatus_frisingensis	0.021	0.02
Achromobacter_xylosoxidans	0.021	0.02
Leptotrichia_wadei	0.021	0.016
Chitinophaga_filiformis	0.021	0.023
Breznakiella_homolactica	0.021	0.019
Desulfosarcina_alkanivorans	0.021	0.021
Bernardetia_litoralis	0.021	0.02
Bifidobacterium_adolescentis	0.021	0.022
Thermaerobacter_sp__PB12_4term	0.021	0.021
Bifidobacterium_pullorum	0.021	0.023
Bifidobacterium_asteroides	0.021	0.018
Peptoclostridium_acidaminophilum	0.021	0.019
Serpentinicella_alkaliphila	0.021	0.016
Amedibacterium_intestinale	0.021	0.019
Desulfonema_magnum	0.021	0.02
Providencia_rettgeri	0.021	0.019
Desulfuromonas_soudanensis	0.021	0.022
Mycoplasma_feriruminatoris	0.021	0.018
Rhodocytophaga_rosea	0.021	0.02
Desulfatibacillum_aliphaticivorans	0.021	0.021
Paenibacillus_cellulositrophicus	0.021	0.02
Paenibacillus_dendritiformis	0.021	0.021
Brachyspira_intermedia	0.021	0.019
Malaciobacter_molluscorum	0.021	0.017
Clostridium_sp__JN_1	0.021	0.017
Cupriavidus_pauculus	0.021	0.022
Limnochorda_pilosa	0.021	0.02
Alkalitalea_saponilacus	0.021	0.02
Megalodesulfovibrio_gigas	0.021	0.024
Bacteroides_luhongzhouii	0.02	0.02
Chitinophaga_sp__HK235	0.02	0.02
Porphyromonas_crevioricanis	0.02	0.021
Anaeromyxobacter_sp__Fw109_5	0.02	0.021
Eubacterium_sp__NSJ_61	0.02	0.02
Labilithrix_luteola	0.02	0.021
Mucilaginibacter_ginsenosidivorans	0.02	0.021
Faecalibacterium_sp__IP329	0.02	0.018
Mycoplasma_capricolum	0.02	0.018
Carboxydocella_thermautotrophica	0.02	0.023
Acetivibrio_saccincola	0.02	0.02
Aeromonas_caviae	0.02	0.009
Clavibacter_michiganensis	0.02	0.02
Riemerella_anatipestifer	0.02	0.019
Bacillus_pseudomycoides	0.02	0.018
Paenibacillus_stellifer	0.02	0.018
Spirochaeta_thermophila	0.02	0.023
Bibersteinia_trehalosi	0.02	0.011
Hydrogenibacillus_sp__N12	0.02	0.019
Clostridium_scatologenes	0.02	0.018
Cohnella_sp__LGH	0.02	0.018
Elizabethkingia_anophelis	0.02	0.02
Leadbettera_azotonutricia	0.02	0.021
Phascolarctobacterium_sp__Marseille_Q4147	0.02	0.021
Cohnella_candidum	0.02	0.018
Anaeromyxobacter_sp__Red232	0.02	0.02
Saprospira_grandis	0.02	0.022
Malaciobacter_mytili	0.02	0.02
Methanococcus_maripaludis	0.02	0.017
Sphingobacterium_lactis	0.02	0.016
Companilactobacillus_crustorum	0.02	0.023
Haemophilus_parainfluenzae	0.02	0.016
Petrocella_atlantisensis	0.02	0.016
Brachyspira_hampsonii	0.02	0.018
Limosilactobacillus_reuteri	0.02	0.018
Thermoanaerobacterium_thermosaccharolyticum	0.02	0.017
Mycoplasma_anserisalpingitidis	0.02	0.016
Proteus_vulgaris	0.02	0.017
Sphaerochaeta_associata	0.02	0.02
Desulfitobacterium_hafniense	0.019	0.02
Pseudobacter_ginsenosidimutans	0.019	0.022
Geobacter_sp__FeAm09	0.019	0.02
Rufibacter_sp__DG15C	0.019	0.02
Capnocytophaga_gingivalis	0.019	0.021
Sinomicrobium_kalidii	0.019	0.021
Chryseobacterium_indoltheticum	0.019	0.017
Gottfriedia_acidiceleris	0.019	0.017
Poseidonibacter_lekithochrous	0.019	0.018
Tolypothrix_tenuis	0.019	0.015
Weizmannia_coagulans	0.019	0.02
Capnocytophaga_sputigena	0.019	0.016
Geminocystis_herdmanii	0.019	0.019
Schaalia_odontolytica	0.019	0.018
Keratinibaculum_paraultunense	0.019	0.018
Megasphaera_hexanoica	0.019	0.02
Lactobacillus_johnsonii	0.019	0.018
Agrobacterium_vitis	0.019	0.018
Nibribacter_ruber	0.019	0.021
Nibricoccus_aquaticus	0.019	0.019
Paenibacillus_sp__32O_W	0.019	0.019
Treponema_primitia	0.019	0.019
Urbifossiella_limnaea	0.019	0.02
Aminipila_terrae	0.019	0.018
Draconibacterium_orientale	0.019	0.019
Sulfidibacter_corallicola	0.019	0.019
Thermaerobacter_marianensis	0.019	0.019
Arcobacter_venerupis	0.019	0.015
Bifidobacterium_scardovii	0.019	0.019
Ferribacterium_limneticum	0.019	0.018
Paenibacillus_donghaensis	0.019	0.019
Persicimonas_caeni	0.019	0.018
Lactococcus_cremoris	0.019	0.03
Planctomyces_sp__SH_PL62	0.019	0.019
Bacteroides_sp__M10	0.019	0.019
Candidatus_Formimonas_warabiya	0.019	0.018
Halanaerobium_praevalens	0.019	0.015
Staphylococcus_simiae	0.019	0.015
Fusobacterium_varium	0.018	0.016
Solidesulfovibrio_carbinoliphilus	0.018	0.019
Luteitalea_sp__TBR_22	0.018	0.017
Ruminiclostridium_cellulolyticum	0.018	0.016
Geobacter_sp__SVR	0.018	0.017
Calothrix_sp__PCC_7716	0.018	0.019
Lactobacillus_delbrueckii	0.018	0.018
Anoxybacillus_sediminis	0.018	0.019
Enterocloster_clostridioformis	0.018	0.019
Rossellomorea_marisflavi	0.018	0.018
Fusobacterium_mortiferum	0.018	0.017
Rivularia_sp__PCC_7116	0.018	0.017
Moorella_thermoacetica	0.018	0.016
Prevotella_sp__E15_14	0.018	0.021
Pseudodesulfovibrio_cashew	0.018	0.019
Phascolarctobacterium_succinatutens	0.018	0.021
Luteolibacter_luteus	0.018	0.018
Sebaldella_termitidis	0.018	0.018
Flavobacterium_jumunjinense	0.018	0.016
Moorella_sp__Hama_1	0.018	0.017
Enterobacter_cloacae	0.018	0.016
Pontibacter_sp__SGAir0037	0.018	0.019
Fibrella_sp__ES10_3_2_2	0.018	0.018
Mariniplasma_anaerobium	0.018	0.019
Pantoea_agglomerans	0.018	0.016
Pelobacter_propionicus	0.018	0.017
Acinetobacter_johnsonii	0.018	0.017
Arcobacter_nitrofigilis	0.018	0.015
Desulfosarcina_widdelii	0.018	0.019
Syntrophotalea_acetylenica	0.018	0.018
Desulfobulbus_propionicus	0.018	0.017
Arcobacter_sp__ARW1_2F2	0.018	0.014
Pelolinea_submarina	0.018	0.018
Botrimarina_mediterranea	0.018	0.019
Pontibacter_korlensis	0.018	0.018
Heyndrickxia_oleronia	0.018	0.013
Ehrlichia_ruminantium	0.017	0.015
Acetoanaerobium_sticklandii	0.017	0.017
Paenibacillus_durus	0.017	0.019
Roseimicrobium_sp__ORNL1	0.017	0.018
Bacillus_subtilis	0.017	0.013
Vulgatibacter_incomptus	0.017	0.019
Candidatus_Thiodictyon_syntrophicum	0.017	0.018
Cereibacter_sphaeroides	0.017	0.015
Peribacillus_frigoritolerans	0.017	0.016
Bulleidia_sp__zg_1006	0.017	0.02
Pirellulimonas_nuda	0.017	0.018
Vallitalea_pronyensis	0.017	0.017
Flavihumibacter_rivuli	0.017	0.019
Malaciobacter_pacificus	0.017	0.015
Phnomibacter_ginsenosidimutans	0.017	0.019
Acholeplasma_hippikon	0.017	0.017
Hymenobacter_sp__DG25B	0.017	0.017
Flavisolibacter_ginsenosidimutans	0.017	0.019
Verrucomicrobium_spinosum	0.017	0.018
Cyanobacterium_aponinum	0.017	0.014
Mucispirillum_schaedleri	0.017	0.016
Gemella_morbillorum	0.017	0.014
Pseudodesulfovibrio_aespoeensis	0.017	0.019
Macrococcus_canis	0.017	0.015
Bradyrhizobium_erythrophlei	0.017	0.016
Methylomusa_anaerophila	0.017	0.016
Chitinophaga_pinensis	0.017	0.017
Malaciobacter_halophilus	0.017	0.013
Saccharopolyspora_erythraea	0.017	0.019
Humisphaera_borealis	0.017	0.018
Campylobacter_jejuni	0.017	0.015
Candidatus_Desulforudis_audaxviator	0.017	0.014
Gloeothece_citriformis	0.017	0.015
Caldilinea_aerophila	0.017	0.016
Campylobacter_sp__RM12651	0.017	0.015
Phycisphaera_mikurensis	0.017	0.018
Pseudomonas_chlororaphis	0.017	0.017
Dehalobacterium_formicoaceticum	0.017	0.016
Desulfovibrio_sulfodismutans	0.017	0.017
Vibrio_parahaemolyticus	0.017	0.015
Campylobacter_ureolyticus	0.017	0.015
Moorella_glycerini	0.017	0.015
Paraflavitalea_soli	0.017	0.017
Hymenobacter_sp__BRD67	0.017	0.018
Metamycoplasma_hominis	0.017	0.015
Methanosarcina_barkeri	0.017	0.017
Ensifer_adhaerens	0.017	0.014
Flammeovirga_pectinis	0.017	0.013
Photobacterium_damselae	0.017	0.017
Sporomusa_termitida	0.017	0.017
Myxococcus_xanthus	0.017	0.019
Vagococcus_fluvialis	0.017	0.017
Schnuerera_ultunensis	0.016	0.015
Streptococcus_sanguinis	0.016	0.015
Desulfolutivibrio_sulfoxidireducens	0.016	0.017
Gudongella_oleilytica	0.016	0.016
Mucilaginibacter_paludis	0.016	0.019
Dyadobacter_sandarakinus	0.016	0.018
Pseudodesulfovibrio_tunisiensis	0.016	0.017
Desulfovibrio_sp__86	0.016	0.017
Campylobacter_sputorum	0.016	0.015
Clostridium_drakei	0.016	0.015
Candidatus_Syntrophocurvum_alkaliphilum	0.016	0.013
Paenibacillus_konkukensis	0.016	0.017
Adhaeribacter_swui	0.016	0.016
Fusobacterium_gastrosuis	0.016	0.013
Eubacterium_callanderi	0.016	0.017
Nostoc_sp__TCL26_01	0.016	0.012
Flavobacterium_psychrophilum	0.016	0.014
Nitrospirillum_amazonense	0.016	0.017
Spirosoma_taeanense	0.016	0.018
Enterococcus_hirae	0.016	0.014
Flammeovirga_kamogawensis	0.016	0.017
Pseudoarcobacter_acticola	0.016	0.015
Citrifermentans_bemidjiense	0.016	0.017
Mucisphaera_calidilacus	0.016	0.017
Capnocytophaga_canimorsus	0.016	0.016
Flavobacterium_johnsoniae	0.016	0.015
Hyphobacterium_sp__CCMP332	0.016	0.014
Lutibacter_sp__A80	0.016	0.012
Pyxidicoccus_sp__SCPEA002	0.016	0.015
Dactylosporangium_vinaceum	0.016	0.017
Leptotrichia_trevisanii	0.016	0.013
Paenibacillus_chitinolyticus	0.016	0.016
Tepidiforma_bonchosmolovskayae	0.016	0.016
Clostridium_aceticum	0.016	0.013
Jonquetella_anthropi	0.016	0.015
Micrococcus_luteus	0.016	0.015
Clostridium_formicaceticum	0.016	0.014
Hymenobacter_qilianensis	0.016	0.019
Aliarcobacter_lanthieri	0.016	0.013
Runella_slithyformis	0.016	0.015
Lactobacillus_panisapium	0.016	0.018
Sphingobacterium_sp__E70	0.016	0.015
Spirosoma_montaniterrae	0.016	0.016
Luteitalea_pratensis	0.016	0.018
Faecalitalea_cylindroides	0.016	0.015
Citrobacter_freundii	0.016	0.014
Trichlorobacter_lovleyi	0.016	0.014
Chondromyces_crocatus	0.016	0.014
Aliarcobacter_cibarius	0.016	0.014
Anaerolinea_thermophila	0.016	0.016
Leptolyngbya_sp__7M	0.016	0.016
Leptospira_noguchii	0.016	0.014
Pseudomonas_syringae	0.016	0.014
Sulfuriroseicoccus_oceanibius	0.016	0.017
Limnoglobus_roseus	0.016	0.016
Brevibacillus_brevis	0.016	0.015
Hymenobacter_sp__DG25A	0.016	0.015
Planctomyces_sp__SH_PL14	0.016	0.016
Peribacillus_asahii	0.016	0.013
Staphylospora_marina	0.015	0.014
Mucilaginibacter_gotjawali	0.015	0.017
Desulforamulus_ruminis	0.015	0.013
Chitinophaga_alhagiae	0.015	0.017
Ralstonia_solanacearum	0.015	0.015
Spirosoma_rigui	0.015	0.015
Thermanaerosceptrum_fracticalcis	0.015	0.014
Paenibacillus_sp__PHS_Z3	0.015	0.015
Acinetobacter_pittii	0.015	0.014
Flavobacterium_magnum	0.015	0.017
Salinivirga_cyanobacteriivorans	0.015	0.017
Biomaibacter_acetigenes	0.015	0.015
Geomonas_oryzisoli	0.015	0.015
Chryseobacterium_taklimakanense	0.015	0.017
Desulfuromonas_sp__AOP6	0.015	0.016
Mahella_australiensis	0.015	0.015
Oleidesulfovibrio_alaskensis	0.015	0.014
Bifidobacterium_bifidum	0.015	0.016
Mogibacterium_diversum	0.015	0.018
Muricauda_aquimarina	0.015	0.016
Staphylococcus_pasteuri	0.015	0.014
Campylobacter_pinnipediorum	0.015	0.013
Syntrophothermus_lipocalidus	0.015	0.015
Muricauda_lutaonensis	0.015	0.017
Acetobacterium_wieringae	0.015	0.015
Candidatus_Arthromitus_sp__SFB_rat_Yit	0.015	0.013
Desulfonema_limicola	0.015	0.016
Fulvivirga_lutea	0.015	0.015
Geobacter_pickeringii	0.015	0.015
Geomonas_paludis	0.015	0.015
Fusobacterium_sp__NSJ_57	0.015	0.014
Mucilaginibacter_ginsenosidivorax	0.015	0.016
Aureibaculum_algae	0.015	0.013
Candidatus_Contubernalis_alkalaceticum	0.015	0.015
Urechidicola_croceus	0.015	0.013
Campylobacter_sp__RM5004	0.015	0.012
Chitinophaga_agri	0.015	0.015
Desulfomicrobium_orale	0.015	0.016
Streptococcus_oralis	0.015	0.016
Aeromonas_salmonicida	0.015	0.013
Terriglobus_roseus	0.015	0.015
Alkaliphilus_oremlandii	0.015	0.015
Brevibacillus_marinus	0.015	0.014
Bifidobacterium_animalis	0.015	0.015
Spirosoma_sp__KUDC1026	0.015	0.014
Gemella_sp__zg_570	0.015	0.015
Lutibacter_sp__A64	0.015	0.013
Chlorobaculum_limnaeum	0.015	0.016
Niastella_koreensis	0.015	0.017
Nostoc_edaphicum	0.015	0.011
Paenibacillus_beijingensis	0.015	0.013
Sphaerobacter_thermophilus	0.015	0.014
Mammaliicoccus_vitulinus	0.015	0.013
Geomonas_subterranea	0.015	0.013
Paludisphaera_borealis	0.015	0.015
Runella_sp__SP2	0.015	0.014
Aquimarina_sp__AD10	0.015	0.013
Staphylococcus_pseudoxylosus	0.015	0.021
Arcobacter_suis	0.015	0.013
Polaribacter_sp__SA4_12	0.015	0.013
Sphingobacterium_sp__CZ_2	0.015	0.017
Bifidobacterium_lemurum	0.015	0.016
Priestia_filamentosa	0.015	0.014
Acididesulfobacillus_acetoxydans	0.015	0.014
Bradyrhizobium_diazoefficiens	0.015	0.016
Desulfosporosinus_youngiae	0.015	0.014
Alienimonas_californiensis	0.014	0.013
Flavobacterium_sediminilitoris	0.014	0.015
Muricauda_sp__SCSIO_65647	0.014	0.014
Paenibacillus_rhizovicinus	0.014	0.016
Orientia_tsutsugamushi	0.014	0.011
Apibacter_raozihei	0.014	0.012
Clostridioides_sp__ES_S_0054_01	0.014	0.013
Fimbriimonas_ginsengisoli	0.014	0.014
Flavobacterium_anhuiense	0.014	0.015
Pelodictyon_luteolum	0.014	0.015
Desulfococcus_multivorans	0.014	0.016
Desulfosudis_oleivorans	0.014	0.015
Geobacter_metallireducens	0.014	0.017
Carnobacterium_maltaromaticum	0.014	0.012
Croceimicrobium_hydrocarbonivorans	0.014	0.016
Geminocystis_sp__NIES_3708	0.014	0.012
Staphylococcus_capitis	0.014	0.013
Rufibacter_tibetensis	0.014	0.015
Solimonas_sp__K1W22B_7	0.014	0.014
Sphingobacterium_sp__UDSM_2020	0.014	0.017
Stackebrandtia_nassauensis	0.014	0.013
Abyssalbus_ytuae	0.014	0.012
Aquihabitans_sp__G128	0.014	0.014
Caminibacter_mediatlanticus	0.014	0.014
Mariniflexile_sp__TRM1_10	0.014	0.012
Bifidobacterium_choerinum	0.014	0.015
Candidatus_Uabimicrobium_amorphum	0.014	0.014
Desulfovibrio_sp__G11	0.014	0.012
Halanaerobium_hydrogeniformans	0.014	0.011
Acidovorax_avenae	0.014	0.015
Baekduia_soli	0.014	0.013
Paenibacillus_tritici	0.014	0.013
Staphylococcus_saprophyticus	0.014	0.012
Evansella_cellulosilytica	0.014	0.011
Roseibium_aggregatum	0.014	0.013
Syntrophobotulus_glycolicus	0.014	0.014
Clostridium_sp__AWRP	0.014	0.014
Frigoriglobus_tundricola	0.014	0.014
Arachidicoccus_sp__B3_10	0.014	0.015
Desulfoscipio_gibsoniae	0.014	0.013
Lutibacter_profundi	0.014	0.012
Pontibacter_pudoricolor	0.014	0.017
Deferribacter_desulfuricans	0.014	0.013
Spiroplasma_floricola	0.014	0.012
Lactococcus_garvieae	0.014	0.011
Mucilaginibacter_sp__SMC90	0.014	0.014
Pseudomonas_psychrotolerans	0.014	0.015
Neorhizobium_galegae	0.014	0.015
Geotalea_uraniireducens	0.014	0.015
Corallococcus_coralloides	0.014	0.015
Haemophilus_influenzae	0.014	0.011
Gemmata_obscuriglobus	0.014	0.013
Capillimicrobium_parvum	0.014	0.014
Bacillus_pumilus	0.014	0.012
Brevibacillus_laterosporus	0.014	0.013
Microcystis_aeruginosa	0.014	0.012
Nostoc_sp__'Peltigera_membranacea_cyanobiont'_N6	0.014	0.011
Iocasia_fonsfrigidae	0.014	0.013
Citrifermentans_bremense	0.014	0.014
Marivirga_tractuosa	0.014	0.012
Tenacibaculum_jejuense	0.014	0.013
Campylobacter_canadensis	0.014	0.012
Ndongobacter_massiliensis	0.014	0.012
Nocardia_brasiliensis	0.014	0.013
Sporosarcina_ureae	0.014	0.013
Bifidobacterium_eulemuris	0.014	0.015
Polaribacter_sp__KT25b	0.014	0.013
Halobacteroides_halobius	0.014	0.015
Geoalkalibacter_subterraneus	0.014	0.013
Mucilaginibacter_celer	0.014	0.012
Geomonas_nitrogeniifigens	0.014	0.013
Paenibacillus_sp__PK3_47	0.014	0.014
Arcobacter_ellisii	0.014	0.014
Syntrophobacter_fumaroxidans	0.014	0.013
Bifidobacterium_subtile	0.014	0.014
Zobellella_denitrificans	0.014	0.015
Desulfovibrio_ferrophilus	0.014	0.014
Polaribacter_vadi	0.014	0.01
Halarcobacter_bivalviorum	0.014	0.011
Spiroplasma_turonicum	0.014	0.012
Halarcobacter_ebronensis	0.014	0.01
Anaerobacillus_isosaccharinicus	0.014	0.013
Archangium_gephyra	0.014	0.015
Bifidobacterium_breve	0.014	0.013
Trueperella_pyogenes	0.014	0.015
Paraconexibacter_sp__02_257	0.013	0.012
Algibacter_alginicilyticus	0.013	0.01
Campylobacter_fetus	0.013	0.012
Lysinibacillus_sphaericus	0.013	0.012
Parascardovia_denticolens	0.013	0.014
Cryptobacterium_curtum	0.013	0.015
Lactobacillus_iners	0.013	0.013
Propionibacterium_freudenreichii	0.013	0.013
Ramlibacter_tataouinensis	0.013	0.015
Silvanigrella_aquatica	0.013	0.012
Enterococcus_cecorum	0.013	0.014
Pasteurella_multocida	0.013	0.012
Gemella_sanguinis	0.013	0.013
Lactobacillus_amylovorus	0.013	0.011
Megamonas_hypermegale	0.013	0.012
Treponema_pedis	0.013	0.013
Draconibacterium_halophilum	0.013	0.014
Kroppenstedtia_eburnea	0.013	0.013
Staphylococcus_saccharolyticus	0.013	0.012
Lysinibacillus_sp__PLM2	0.013	0.011
Mannheimia_varigena	0.013	0.007
Paenibacillus_ihbetae	0.013	0.014
Klebsiella_oxytoca	0.013	0.012
Lactobacillus_crispatus	0.013	0.011
Sphaerochaeta_coccoides	0.013	0.012
Streptomyces_albus	0.013	0.013
Polaribacter_sp__SA4_10	0.013	0.012
Cytophaga_hutchinsonii	0.013	0.012
Polaribacter_cellanae	0.013	0.011
Runella_rosea	0.013	0.013
Mannheimia_granulomatis	0.013	0.008
Candidatus_Koribacter_versatilis	0.013	0.016
Endomicrobium_proavitum	0.013	0.011
Rhodovastum_atsumiense	0.013	0.013
Acholeplasma_laidlawii	0.013	0.011
Conexibacter_woesei	0.013	0.013
Stenotrophomonas_rhizophila	0.013	0.013
Acinetobacter_indicus	0.013	0.012
Gilliamella_apicola	0.013	0.014
Dolosigranulum_pigrum	0.013	0.013
Treponema_vincentii	0.013	0.013
Caulifigura_coniformis	0.013	0.013
Flavivirga_eckloniae	0.013	0.012
Geminocystis_sp__NIES_3709	0.013	0.013
Mammaliicoccus_lentus	0.013	0.012
Spiroplasma_gladiatoris	0.013	0.011
Candidatus_Methanoplasma_termitum	0.013	0.02
Deinococcus_ficus	0.013	0.015
Paenibacillus_sp__FSL_R7_0331	0.013	0.013
Bifidobacterium_dentium	0.013	0.013
Bacillus_glycinifermentans	0.013	0.01
Sphaerochaeta_globosa	0.013	0.013
Filifactor_alocis	0.013	0.013
Leptotrichia_sp__oral_taxon_212	0.013	0.015
Streptococcus_equi	0.013	0.013
Desulfofarcimen_acetoxidans	0.013	0.012
Lysobacter_enzymogenes	0.013	0.013
Streptococcus_pneumoniae	0.013	0.014
Bacillus_amyloliquefaciens	0.013	0.014
Desulfurivibrio_alkaliphilus	0.013	0.012
Malacoplasma_penetrans	0.013	0.013
Methylobacterium_oryzae	0.013	0.021
Empedobacter_falsenii	0.013	0.013
Flavobacterium_panici	0.013	0.01
Mycoplasma_cottewii	0.013	0.01
Pannonibacter_phragmitetus	0.013	0.014
Sulfurifustis_variabilis	0.013	0.012
Xanthomonas_sacchari	0.013	0.011
Bacillus_velezensis	0.013	0.011
Flavobacterium_sp__MDT1_60	0.013	0.011
Malaciobacter_marinus	0.013	0.011
Desulfurispirillum_indicum	0.013	0.011
Spiroplasma_corruscae	0.013	0.012
Cloacibacterium_caeni	0.013	0.009
Paenibacillus_sp__BIHB4019	0.013	0.012
Macrococcus_armenti	0.013	0.011
Tenacibaculum_sp__SZ_18	0.013	0.01
Aliarcobacter_faecis	0.013	0.012
Cruoricaptor_ignavus	0.013	0.013
Tessaracoccus_sp__MC1865	0.013	0.015
Thiocystis_violascens	0.013	0.013
Candidatus_Atelocyanobacterium_thalassa	0.013	0.012
Catenulispora_acidiphila	0.013	0.013
Oceanithermus_profundus	0.013	0.014
Turicibacter_sanguinis	0.013	0.011
Arcobacter_cloacae	0.013	0.013
Candidatus_Portiera_aleyrodidarum	0.013	0.01
Polaribacter_reichenbachii	0.013	0.011
Empedobacter_brevis	0.013	0.013
Syntrophotalea_carbinolica	0.013	0.011
Cellulophaga_lytica	0.013	0.013
Euzebya_pacifica	0.013	0.014
Leclercia_adecarboxylata	0.013	0.013
Croceibacter_atlanticus	0.013	0.011
Mangrovivirga_cuniculi	0.013	0.011
Sneathia_vaginalis	0.013	0.01
Aquimarina_sp__BL5	0.013	0.012
Paenibacillus_sp__R14(2021)	0.013	0.013
Pediococcus_acidilactici	0.013	0.011
Thiospirochaeta_perfilievii	0.013	0.011
Klebsiella_quasipneumoniae	0.013	0.013
Polaribacter_sp__Q13	0.013	0.011
Oleiharenicola_sp__KSB_15	0.013	0.013
Tistrella_mobilis	0.013	0.012
Aquiflexum_balticum	0.013	0.011
Arcticibacterium_luteifluviistationis	0.013	0.012
Bremerella_volcania	0.013	0.013
Longicatena_caecimuris	0.013	0.012
Xanthomonas_hyacinthi	0.013	0.008
Anoxybacter_fermentans	0.013	0.013
Propionibacterium_australiense	0.013	0.014
Cupriavidus_basilensis	0.012	0.014
Geotalea_daltonii	0.012	0.013
Rubrobacter_tropicus	0.012	0.012
Winogradskyella_sp__HaHa_3_26	0.012	0.009
Flavobacterium_oreochromis	0.012	0.014
Sinorhizobium_fredii	0.012	0.014
Sutterella_faecalis	0.012	0.013
Nostoc_linckia	0.012	0.008
Pseudodesulfovibrio_sp__zrk46	0.012	0.011
Saccharopolyspora_gregorii	0.012	0.013
Spirosoma_sp__KCTC_42546	0.012	0.014
Alkaliphilus_metalliredigens	0.012	0.01
Limosilactobacillus_fermentum	0.012	0.012
Vagococcus_carniphilus	0.012	0.011
Cedecea_neteri	0.012	0.013
Faecalibacter_bovis	0.012	0.011
Peptoniphilus_harei	0.012	0.011
Bacillus_cytotoxicus	0.012	0.011
Burkholderia_gladioli	0.012	0.011
Cystobacter_fuscus	0.012	0.012
Nonomuraea_sp__ATCC_55076	0.012	0.013
Wielerella_bovis	0.012	0.012
Spirosoma_pollinicola	0.012	0.013
Malacoplasma_iowae	0.012	0.014
Trueperella_pecoris	0.012	0.011
Spiroplasma_sp__TIUS_1	0.012	0.014
Spirosoma_sp__KCTC_72228	0.012	0.013
Sphaerochaeta_pleomorpha	0.012	0.012
Sphaerospermopsis_torques_reginae	0.012	0.013
Acetobacterium_sp__KB_1	0.012	0.011
Tetragenococcus_halophilus	0.012	0.011
Acidipropionibacterium_acidipropionici	0.012	0.013
Borrelia_miyamotoi	0.012	0.012
Chryseobacterium_camelliae	0.012	0.01
Mycolicibacterium_neoaurum	0.012	0.017
Phenylobacterium_zucineum	0.012	0.012
Polaribacter_litorisediminis	0.012	0.011
Singulisphaera_acidiphila	0.012	0.011
Zymomonas_mobilis	0.012	0.011
Flavobacterium_sp__140616W15	0.012	0.012
Providencia_alcalifaciens	0.012	0.01
Spiroplasma_endosymbiont_of_'Nebria_riversi'	0.012	0.01
Campylobacter_coli	0.012	0.012
Thiocapsa_bogorovii	0.012	0.011
Candidatus_Cyclonatronum_proteinivorum	0.012	0.012
Levilactobacillus_brevis	0.012	0.012
Nostoc_sphaeroides	0.012	0.01
Candidatus_Prometheoarchaeum_syntrophicum	0.012	0.011
Paenibacillus_sp__H1_7	0.012	0.012
Moraxella_osloensis	0.012	0.011
Mycoplasma_sp__OR1901	0.012	0.008
Prevotella_sp__E13_1	0.012	0.014
Chryseobacterium_sp__SC2_2	0.012	0.011
Cutibacterium_avidum	0.012	0.012
Polaribacter_sp__L3A8	0.012	0.01
Rubrivivax_gelatinosus	0.012	0.012
Brevibacillus_sp__BB3_R1	0.012	0.01
Thermosediminibacter_oceani	0.012	0.012
Flavobacterium_branchiophilum	0.012	0.012
Neobacillus_mesonae	0.012	0.011
Nostoc_sp__'Lobaria_pulmonaria_(5183)_cyanobiont'	0.012	0.009
Fenollaria_massiliensis	0.012	0.012
Flavobacterium_sp__CLA17	0.012	0.011
Iamia_sp__SCSIO_61187	0.012	0.013
Nonomuraea_nitratireducens	0.012	0.013
Acetobacterium_woodii	0.012	0.012
Algibacter_sp__L1A34	0.012	0.01
Chlorobaculum_tepidum	0.012	0.013
Sphingobacterium_daejeonense	0.012	0.017
endosymbiont_'TC1'_of_Trimyema_compressum	0.012	0.011
Pelosinus_fermentans	0.012	0.012
Staphylococcus_lugdunensis	0.012	0.01
Staphylococcus_nepalensis	0.012	0.009
Geobacter_benzoatilyticus	0.012	0.013
Brucepastera_parasyntrophica	0.012	0.011
Dehalobacter_restrictus	0.012	0.007
Vibrio_vulnificus	0.012	0.011
Stigmatella_aurantiaca	0.012	0.013
Xanthomonas_translucens	0.012	0.013
Anaeromyxobacter_dehalogenans	0.012	0.013
Clostridium_sp__001	0.012	0.01
Flavobacterium_davisii	0.012	0.01
Olivibacter_sp__LS_1	0.012	0.011
Polaribacter_batillariae	0.012	0.011
Selenomonas_sp__oral_taxon_478	0.012	0.01
Paenibacillus_sp__URB8_2	0.012	0.013
Paenibacillus_sp__YPD9_1	0.012	0.01
Caldisphaera_lagunensis	0.012	0.007
Ignavibacterium_album	0.012	0.011
Pedobacter_cryoconitis	0.012	0.01
Pseudomonas_oryzihabitans	0.012	0.014
Arachnia_propionica	0.012	0.011
Conexibacter_sp__SYSU_D00693	0.012	0.013
Streptosporangium_sp__'caverna'	0.012	0.011
Winogradskyella_forsetii	0.012	0.01
Corynebacterium_humireducens	0.012	0.015
Anabaena_cylindrica	0.012	0.009
Azospirillum_thermophilum	0.012	0.012
Mucilaginibacter_rubeus	0.012	0.012
Polaribacter_sp__Hel1_33_78	0.012	0.01
Pseudoleptotrichia_goodfellowii	0.012	0.012
Spirosoma_sp__RHs26	0.012	0.013
Enterococcus_avium	0.012	0.011
Piscirickettsia_salmonis	0.012	0.01
Roseomonas_gilardii	0.012	0.012
Chondrocystis_sp__NIES_4102	0.012	0.015
Methylomicrobium_album	0.012	0.01
Fluviispira_sanaruensis	0.012	0.012
Paenibacillus_azoreducens	0.012	0.011
Bifidobacterium_thermophilum	0.012	0.013
Dechloromonas_denitrificans	0.012	0.013
Emticicia_sp__21SJ11W_3	0.012	0.013
Scytonema_sp__NIES_4073	0.012	0.009
Anaerohalosphaera_lusitana	0.012	0.013
Nonomuraea_coxensis	0.012	0.012
Propioniciclava_coleopterorum	0.012	0.015
Aliivibrio_fischeri	0.012	0.01
Chryseobacterium_sp__ZHDP1	0.012	0.01
Fluviicola_taffensis	0.012	0.011
Paroceanicella_profunda	0.012	0.013
Elusimicrobium_minutum	0.012	0.012
Lancefieldella_parvula	0.012	0.012
Streptomyces_bingchenggensis	0.012	0.01
Azoarcus_communis	0.012	0.013
Crocinitomix_sp__GM2_3_6_6	0.012	0.012
Roseococcus_microcysteis	0.012	0.01
Belliella_baltica	0.012	0.011
Bradymonas_sediminis	0.012	0.012
Chryseobacterium_shandongense	0.012	0.011
Flavobacterium_nackdongense	0.012	0.01
Syntrophus_aciditrophicus	0.012	0.012
Bradyrhizobium_arachidis	0.012	0.012
Candidatus_Saccharimonas_aalborgensis	0.012	0.01
Ilyobacter_polytropus	0.012	0.01
Koleobacter_methoxysyntrophicus	0.012	0.01
Halorhodospira_halophila	0.012	0.012
Brevibacillus_composti	0.011	0.015
Mucilaginibacter_mallensis	0.011	0.011
Streptococcus_pyogenes	0.011	0.01
Chryseobacterium_arthrosphaerae	0.011	0.013
Flavobacterium_sp__CS20	0.011	0.01
Bdellovibrio_bacteriovorus	0.011	0.013
Dyadobacter_sp__CY22	0.011	0.01
Miltoncostaea_oceani	0.011	0.01
Schleiferilactobacillus_harbinensis	0.011	0.012
Floricoccus_penangensis	0.011	0.01
Polaribacter_pectinis	0.011	0.009
Chryseobacterium_glaciei	0.011	0.009
Lactiplantibacillus_plantarum	0.011	0.013
Niabella_ginsenosidivorans	0.011	0.011
Selenomonas_sp__oral_taxon_136	0.011	0.01
Treponema_phagedenis	0.011	0.009
Alloacidobacterium_dinghuense	0.011	0.011
Aquincola_tertiaricarbonis	0.011	0.011
Chitinophaga_caeni	0.011	0.01
Pimelobacter_simplex	0.011	0.013
Polaribacter_haliotis	0.011	0.01
Xanthomonas_arboricola	0.011	0.01
Lignipirellula_cremea	0.011	0.012
Roseomonas_sp__OT10	0.011	0.01
Streptomyces_sp__NHF165	0.011	0.011
Chlorobaculum_parvum	0.011	0.012
Cytobacillus_solani	0.011	0.01
Nitratifractor_salsuginis	0.011	0.012
Paenibacillus_sp__FSL_R7_0273	0.011	0.013
Paenibacillus_tianjinensis	0.011	0.011
Sinorhizobium_meliloti	0.011	0.011
Fusobacterium_gonidiaformans	0.011	0.008
Mycoplasmopsis_bovirhinis	0.011	0.011
Achromobacter_spanius	0.011	0.011
Devosia_sp__A16	0.011	0.012
Microterricola_viridarii	0.011	0.013
Thermanaerovibrio_acidaminovorans	0.011	0.011
Sphingobacterium_multivorum	0.011	0.009
Glaesserella_parasuis	0.011	0.009
Lacinutrix_sp__Bg11_31	0.011	0.01
Massilia_putida	0.011	0.014
Melittangium_boletus	0.011	0.012
Kutzneria_sp__CA_103260	0.011	0.011
Marichromatium_purpuratum	0.011	0.012
Natranaerofaba_carboxydovora	0.011	0.011
Faecalibacterium_sp__I2392	0.011	0.01
Hymenobacter_baengnokdamensis	0.011	0.012
Propionibacterium_acidifaciens	0.011	0.011
Planktothrix_agardhii	0.011	0.009
Flavobacterium_sp__IGB_4_14	0.011	0.01
Solitalea_canadensis	0.011	0.011
Thermincola_potens	0.011	0.01
Asticcacaulis_excentricus	0.011	0.013
Maioricimonas_rarisocia	0.011	0.011
Anaerococcus_mediterraneensis	0.011	0.009
Deinococcus_maricopensis	0.011	0.012
Flavobacterium_sp__I3_2	0.011	0.009
Formosa_sediminum	0.011	0.01
Pseudoxanthomonas_suwonensis	0.011	0.013
Streptomyces_sp__SN_593	0.011	0.011
Corynebacterium_freneyi	0.011	0.012
Desulfotomaculum_nigrificans	0.011	0.01
Larkinella_sp__IE_0392	0.011	0.012
Neisseria_dentiae	0.011	0.01
Paenibacillus_sp__FSL_H7_0357	0.011	0.012
Cohnella_cholangitidis	0.011	0.01
Desulfoglaeba_alkanexedens	0.011	0.011
Rhodospirillum_centenum	0.011	0.01
Spiroplasma_taiwanense	0.011	0.01
Burkholderia_ubonensis	0.011	0.01
Flavobacterium_gilvum	0.011	0.01
Arachidicoccus_sp__BS20	0.011	0.009
Melissococcus_plutonius	0.011	0.01
Mycoplasma_sp__NEAQ87857	0.011	0.012
Streptococcus_thermophilus	0.011	0.01
Paenibacillus_sabinae	0.011	0.011
Rubrobacter_marinus	0.011	0.011
Acuticoccus_sp__I52_16_1	0.011	0.011
Mammaliicoccus_stepanovicii	0.011	0.011
Seonamhaeicola_sp__S2_3	0.011	0.009
Alkalicella_caledoniensis	0.011	0.01
Azospirillum_brasilense	0.011	0.011
Flavobacterium_sp__CJ74	0.011	0.01
Lacinutrix_venerupis	0.011	0.011
Tepidanaerobacter_acetatoxydans	0.011	0.009
Thermacetogenium_phaeum	0.011	0.011
Phormidium_sp__ETS_05	0.011	0.01
Pseudonocardia_sp__DSM_110487	0.011	0.01
Spiroplasma_cantharicola	0.011	0.01
Acetobacter_aceti	0.011	0.011
Granulibacter_bethesdensis	0.011	0.01
Paenibacillus_cellulosilyticus	0.011	0.011
Paenibacillus_psychroresistens	0.011	0.012
Niveispirillum_cyanobacteriorum	0.011	0.011
Jiangella_sp__DSM_45060	0.011	0.009
Limihaloglobus_sulfuriphilus	0.011	0.011
Lysinibacillus_fusiformis	0.011	0.01
Rhodococcus_opacus	0.011	0.012
Sutcliffiella_cohnii	0.011	0.01
Wenyingzhuangia_fucanilytica	0.011	0.011
Malaciobacter_canalis	0.011	0.01
Mycoplasma_miroungirhinis	0.011	0.011
Myroides_odoratus	0.011	0.01
Epilithonimonas_vandammei	0.011	0.011
Frankia_inefficax	0.011	0.01
Mycoplasmopsis_gallinacea	0.011	0.01
Vagococcus_lutrae	0.011	0.009
Elizabethkingia_meningoseptica	0.011	0.01
Enterococcus_mundtii	0.011	0.009
Mannheimia_haemolytica	0.011	0.007
Massilia_sp__DM_R_R2A_13	0.011	0.012
Streptomyces_tsukubensis	0.011	0.011
Turicibacter_sp__TJ11	0.011	0.01
Arcobacter_aquimarinus	0.011	0.01
Arthrobacter_crystallopoietes	0.011	0.01
Natranaerobius_thermophilus	0.011	0.011
Paenibacillus_lentus	0.011	0.008
Thermochromatium_tepidum	0.011	0.01
Egicoccus_halophilus	0.011	0.011
Flavobacterium_columnare	0.011	0.009
Mitsuaria_sp__7	0.011	0.01
Mycoplasmopsis_cynos	0.011	0.01
Oceanimonas_sp__GK1	0.011	0.01
Paenibacillus_borealis	0.011	0.01
Pedobacter_endophyticus	0.011	0.009
Staphylococcus_equorum	0.011	0.008
Alkalihalobacillus_sp__LMS39	0.011	0.009
Epilithonimonas_zeae	0.011	0.01
Hyphomicrobium_denitrificans	0.011	0.011
Jeotgalibaca_sp__MA1X17_3	0.011	0.008
Leptotrichia_sp__oral_taxon_221	0.011	0.009
Metabacillus_sp__KUDC1714	0.011	0.01
Niallia_sp__Man26	0.011	0.008
Pseudomonas_alcaligenes	0.011	0.011
Algibacter_sp__L3A6	0.011	0.009
Sabulilitoribacter_sp__BrNp1_15	0.011	0.011
Solidesulfovibrio_magneticus	0.011	0.011
Treponema_sp__Marseille_Q4132	0.011	0.009
Desulfomicrobium_baculatum	0.011	0.012
Thermosipho_africanus	0.011	0.009
Thioflavicoccus_mobilis	0.011	0.012
Hypericibacter_adhaerens	0.011	0.011
Aliarcobacter_skirrowii	0.011	0.01
Kutzneria_albida	0.011	0.009
Sphingobacterium_thalpophilum	0.011	0.013
Stella_humosa	0.011	0.012
Streptosporangium_roseum	0.011	0.011
Thermosulfurimonas_marina	0.011	0.01
Virgibacillus_halodenitrificans	0.011	0.009
Achromobacter_denitrificans	0.011	0.009
Actinopolymorpha_singaporensis	0.011	0.01
Alicycliphilus_denitrificans	0.011	0.01
Echinicola_strongylocentroti	0.011	0.01
Fusobacterium_canifelinum	0.011	0.009
Fulvivirga_sp__SS9_22	0.011	0.009
Mucilaginibacter_sp__14171R_50	0.011	0.012
Spiroplasma_litorale	0.011	0.01
Anaerococcus_prevotii	0.011	0.011
Arcobacter_sp__FWKO_B	0.011	0.008
Halarcobacter_anaerophilus	0.011	0.011
Paraphotobacterium_marinum	0.011	0.009
Campylobacter_hyointestinalis	0.011	0.011
Chryseobacterium_gallinarum	0.011	0.009
Corynebacterium_casei	0.011	0.004
Cupriavidus_necator	0.011	0.009
Filimonas_lacunae	0.011	0.009
Immundisolibacter_cernigliae	0.011	0.011
Paenibacillus_sp__sptzw28	0.011	0.01
Rhizobium_etli	0.011	0.009
Roseomonas_haemaphysalidis	0.011	0.011
Actinoplanes_friuliensis	0.011	0.01
Azospira_restricta	0.011	0.011
Bacillus_sp__FJAT_22090	0.011	0.01
Chryseobacterium_nepalense	0.011	0.01
Methylorubrum_populi	0.011	0.011
Rhodococcus_fascians	0.011	0.011
Streptacidiphilus_sp__PB12_B1b	0.011	0.012
Flavobacterium_sp__F_323	0.01	0.009
Prosthecochloris_sp__GSB1	0.01	0.01
Roseomonas_marmotae	0.01	0.012
Staphylococcus_cohnii	0.01	0.008
Acidipropionibacterium_jensenii	0.01	0.01
Actinomadura_verrucosospora	0.01	0.011
Arachidicoccus_soli	0.01	0.009
Bacillus_sp__S3	0.01	0.009
Niabella_soli	0.01	0.01
Oceanobacillus_jeddahense	0.01	0.009
Actinoplanes_derwentensis	0.01	0.011
Chryseobacterium_sp__C_17	0.01	0.01
Lactobacillus_jensenii	0.01	0.01
Veillonella_parvula	0.01	0.01
Candidatus_Endomicrobium_trichonymphae	0.01	0.008
Francisella_philomiragia	0.01	0.009
Nonomuraea_gerenzanensis	0.01	0.012
Sphingobacterium_sp__PCS056	0.01	0.01
Tenacibaculum_maritimum	0.01	0.01
Burkholderia_multivorans	0.01	0.01
Carnobacterium_divergens	0.01	0.01
Granulicella_tundricola	0.01	0.011
Magnetospirillum_gryphiswaldense	0.01	0.012
Ammonifex_degensii	0.01	0.01
Echinicola_rosea	0.01	0.009
Labrys_sp__KNU_23	0.01	0.011
Methylobacterium_aquaticum	0.01	0.015
Spiroplasma_helicoides	0.01	0.009
Flavobacterium_sp__KBS0721	0.01	0.01
Niallia_sp__RD1	0.01	0.01
Kordia_antarctica	0.01	0.01
Lelliottia_amnigena	0.01	0.01
Thermobaculum_terrenum	0.01	0.014
Polaribacter_dokdonensis	0.01	0.01
Staphylococcus_pseudintermedius	0.01	0.009
Chryseobacterium_sp__IHB_B_17019	0.01	0.01
Desulfosporosinus_acidiphilus	0.01	0.009
Massilia_sp__HC52	0.01	0.011
Spiroplasma_culicicola	0.01	0.01
Candidatus_Kaistella_beijingensis	0.01	0.009
Cytobacillus_oceanisediminis	0.01	0.009
Flavobacterium_haoranii	0.01	0.008
Methanobacterium_lacus	0.01	0.009
Olleya_aquimaris	0.01	0.009
Actinoplanes_missouriensis	0.01	0.011
Alicyclobacillus_mengziensis	0.01	0.011
Aquabacter_sp__L1I39	0.01	0.01
Azoarcus_sp__KH32C	0.01	0.01
Brevibacillus_agri	0.01	0.01
Flavobacterium_plurextorum	0.01	0.01
Francisella_tularensis	0.01	0.01
Pantoea_ananatis	0.01	0.012
Roseiflexus_castenholzii	0.01	0.009
Spiroplasma_chinense	0.01	0.008
Spirosoma_aerolatum	0.01	0.01
Aeromonas_schubertii	0.01	0.01
Burkholderia_cenocepacia	0.01	0.01
Candidatus_Pelagibacter_sp__FZCC0015	0.01	0.007
Chryseobacterium_sp__G0201	0.01	0.009
Desulfosporosinus_orientis	0.01	0.01
Dyadobacter_sp__NIV53	0.01	0.01
Halothermothrix_orenii	0.01	0.009
Metabacillus_sediminilitoris	0.01	0.011
Mycoplasmopsis_maculosa	0.01	0.01
Paenibacillus_algicola	0.01	0.011
Staphylococcus_caprae	0.01	0.007
Vibrio_cholerae	0.01	0.01
Candidatus_Babela_massiliensis	0.01	0.008
Pseudopedobacter_saltans	0.01	0.01
Staphylococcus_arlettae	0.01	0.009
Streptomyces_formicae	0.01	0.011
Zunongwangia_profunda	0.01	0.009
Deinococcus_gobiensis	0.01	0.011
Formosa_sp__L2A11	0.01	0.007
Microbacterium_foliorum	0.01	0.011
Alcaligenes_faecalis	0.01	0.008
Deinococcus_metallilatus	0.01	0.01
Echinicola_vietnamensis	0.01	0.012
Maridesulfovibrio_salexigens	0.01	0.01
Methylogaea_oryzae	0.01	0.01
Mesobacillus_foraminis	0.01	0.008
Nordella_sp__HKS_07	0.01	0.01
Tenacibaculum_dicentrarchi	0.01	0.009
Truepera_radiovictrix	0.01	0.011
Catellatospora_sp__IY07_71	0.01	0.01
Cellulosimicrobium_cellulans	0.01	0.011
Gemmatimonas_groenlandica	0.01	0.012
Sutcliffiella_horikoshii	0.01	0.009
Thermodesulfovibrio_yellowstonii	0.01	0.009
Adhaeribacter_radiodurans	0.01	0.01
Erysipelothrix_inopinata	0.01	0.011
Ezakiella_coagulans	0.01	0.009
Polaribacter_sp__ALD11	0.01	0.009
Spirosoma_radiotolerans	0.01	0.011
Tenacibaculum_mesophilum	0.01	0.011
Bacillus_wiedmannii	0.01	0.01
Fulvivirga_sp__SW1_E11	0.01	0.009
Pedobacter_sp__D749	0.01	0.008
Roseomonas_sp__S08	0.01	0.01
Echinicola_marina	0.01	0.009
Olivibacter_sp__SDN3	0.01	0.009
Staphylococcus_simulans	0.01	0.009
Desulfohalobium_retbaense	0.01	0.01
Geobacter_sp__DSM_9736	0.01	0.01
Maribacter_hydrothermalis	0.01	0.007
Winogradskyella_helgolandensis	0.01	0.009
Chryseobacterium_sp__Y16C	0.01	0.008
Cohnella_herbarum	0.01	0.011
Myroides_fluvii	0.01	0.011
Nocardia_cyriacigeorgica	0.01	0.01
Tessaracoccus_sp__J1M15	0.01	0.011
Algoriphagus_sp__Y33	0.01	0.01
Aneurinibacillus_soli	0.01	0.009
Lacibacter_sp__S13_6_6	0.01	0.01
Mycoplasma_sp__1018B	0.01	0.009
Xanthobacter_dioxanivorans	0.01	0.01
Klebsiella_aerogenes	0.01	0.009
Actinoplanes_sp__L3_i22	0.01	0.011
Amycolatopsis_sp__DSM_110486	0.01	0.009
Deinococcus_radiopugnans	0.01	0.008
Ilumatobacter_coccineus	0.01	0.01
Microbacterium_oleivorans	0.01	0.01
Streptomyces_niveus	0.01	0.009
Usitatibacter_rugosus	0.01	0.01
Chryseobacterium_sp__T16E_39	0.01	0.011
Flavobacterium_endoglycinae	0.01	0.01
Flavobacterium_sp__KK2020170	0.01	0.008
Sulfurivermis_fontis	0.01	0.011
Tolypothrix_sp__PCC_7910	0.01	0.008
Azorhizobium_caulinodans	0.01	0.01
Methylomagnum_ishizawai	0.01	0.011
Streptomyces_lydicus	0.01	0.011
Campylobacter_blaseri	0.01	0.009
Cyclobacterium_marinum	0.01	0.009
Myroides_sp__SCSIO_72103	0.01	0.007
Amycolatopsis_sp__YIM_10	0.01	0.01
Cellulophaga_sp__HaHaR_3_176	0.01	0.009
Flavobacterium_covae	0.01	0.01
Lacipirellula_parvula	0.01	0.01
Sphingobacterium_sp__DR205	0.01	0.01
Aquihabitans_sp__Kera_3	0.01	0.011
Bifidobacterium_angulatum	0.01	0.011
Flavobacterium_pallidum	0.01	0.01
Miltoncostaea_marina	0.01	0.009
Sporolactobacillus_terrae	0.01	0.01
Candidatus_Pelagibacter_sp__HIMB1321	0.01	0.008
Nisaea_acidiphila	0.01	0.009
Paenibacillus_naphthalenovorans	0.01	0.01
Saccharothrix_syringae	0.01	0.01
Zhaonella_formicivorans	0.01	0.008
Apilactobacillus_apisilvae	0.01	0.01
Candidatus_Absconditicoccus_praedator	0.01	0.009
Mycobacteroides_abscessus	0.01	0.01
Paenibacillus_sp__CAA11	0.01	0.009
Pedobacter_roseus	0.01	0.011
Streptomyces_chartreusis	0.01	0.01
Candidatus_Kuenenia_stuttgartiensis	0.01	0.009
Flammeovirga_yaeyamensis	0.01	0.008
Flavobacterium_indicum	0.01	0.011
Paenibacillus_sp__JZ16	0.01	0.008
Aliarcobacter_thereius	0.01	0.01
Arthrobacter_alpinus	0.01	0.011
Massilia_forsythiae	0.01	0.01
Rhodobacter_capsulatus	0.01	0.009
Spiroplasma_tabanidicola	0.01	0.009
Corynebacterium_vitaeruminis	0.01	0.009
Kurthia_sp__11kri321	0.01	0.008
Tessaracoccus_defluvii	0.01	0.01
Tumebacillus_algifaecis	0.01	0.01
Alteromonas_macleodii	0.01	0.009
Candidatus_Pelagibacter_sp__RS40	0.01	0.009
Indioceanicola_profundi	0.01	0.01
Latilactobacillus_sakei	0.01	0.008
Methanobacterium_sp__MethCAN	0.01	0.009
Methanolacinia_petrolearia	0.01	0.011
Paenibacillus_sophorae	0.01	0.01
Pseudodesulfovibrio_profundus	0.01	0.009
Sphingobacterium_hotanense	0.01	0.01
Ureaplasma_diversum	0.01	0.01
Caulobacter_vibrioides	0.01	0.011
Paenibacillus_physcomitrellae	0.01	0.01
Echinicola_soli	0.01	0.01
Lactobacillus_sp__3B(2020)	0.01	0.01
Paenibacillus_sp__HWE_109	0.01	0.009
Acinetobacter_seifertii	0.01	0.01
Bacillus_dafuensis	0.01	0.009
Paenibacillus_protaetiae	0.01	0.01
Xanthomonas_vesicatoria	0.01	0.004
Yinghuangia_sp__ASG_101	0.01	0.01
Desulforapulum_autotrophicum	0.01	0.009
Ferrimonas_balearica	0.01	0.009
Leuconostoc_gelidum	0.01	0.008
Geovibrio_thiophilus	0.01	0.01
Hymenobacter_sp__HDW8	0.01	0.01
Kytococcus_sedentarius	0.01	0.01
Methylorubrum_extorquens	0.01	0.009
Paenibacillus_albus	0.01	0.01
Pelosinus_sp__UFO1	0.01	0.009
Pigmentiphaga_sp__H8	0.01	0.01
Streptomyces_marincola	0.01	0.01
Syntrophotalea_acetylenivorans	0.01	0.011
Acetohalobium_arabaticum	0.01	0.01
Algoriphagus_sp__NBT04N3	0.01	0.009
Granulicella_sp__WH15	0.01	0.011
Nocardiopsis_sp__MT53	0.01	0.013
Sediminispirochaeta_smaragdinae	0.01	0.009
Serratia_plymuthica	0.01	0.009
Symmachiella_dynata	0.01	0.011
Peribacillus_simplex	0.01	0.008
Pseudomonas_viridiflava	0.01	0.009
Syntrophomonas_wolfei	0.01	0.008
Virgibacillus_sp__Bac332	0.01	0.01
Arenibacter_algicola	0.01	0.009
Chryseobacterium_carnipullorum	0.01	0.01
Flavobacterium_crocinum	0.01	0.01
Granulicella_sp__5B5	0.01	0.009
Leuconostoc_mesenteroides	0.01	0.008
Mesoplasma_lactucae	0.01	0.007
Paenibacillus_sp__19GGS1_52	0.01	0.011
Paludibacterium_yongneupense	0.01	0.009
Vagococcus_hydrophili	0.01	0.007
Zhouia_spongiae	0.01	0.011
Flavobacterium_kingsejongi	0.009	0.008
Massilia_violaceinigra	0.009	0.01
Mucilaginibacter_sp__21P	0.009	0.012
Mycolicibacterium_litorale	0.009	0.01
Peptoniphilus_sp__SAHP1	0.009	0.009
Tsukamurella_paurometabola	0.009	0.009
Brevibacillus_sp__MMS20_4M_10_Y	0.009	0.008
Chryseobacterium_sp__POL2	0.009	0.01
Enterobacter_hormaechei	0.009	0.008
Flavisolibacter_tropicus	0.009	0.009
Paracholeplasma_brassicae	0.009	0.008
Peribacillus_butanolivorans	0.009	0.008
Spiroplasma_diminutum	0.009	0.008
Terriglobus_albidus	0.009	0.011
Aeromonas_media	0.009	0.01
Calditerrivibrio_nitroreducens	0.009	0.008
Chryseobacterium_sp__MEBOG06	0.009	0.009
Nocardiopsis_exhalans	0.009	0.01
Edaphobacter_sp__12200R_103	0.009	0.009
Flavobacterium_fluviale	0.009	0.009
Deinococcus_actinosclerus	0.009	0.009
Mucilaginibacter_ginkgonis	0.009	0.01
Psychrobacillus_sp__INOP01	0.009	0.007
Streptococcus_parauberis	0.009	0.007
Synechococcus_elongatus	0.009	0.009
Actinomyces_radicidentis	0.009	0.01
endosymbiont_of_unidentified_scaly_snail_isolate_Monju	0.009	0.009
Lacinutrix_sp__5H_3_7_4	0.009	0.01
Mycoplasmopsis_citelli	0.009	0.009
Chryseobacterium_balustinum	0.009	0.009
Fulvivirga_sp__W9P_11	0.009	0.009
Mycoplasmopsis_agalactiae	0.009	0.008
Cytobacillus_firmus	0.009	0.009
Flavobacterium_sp__F_70	0.009	0.008
Lacipirellula_limnantheis	0.009	0.01
Laribacter_hongkongensis	0.009	0.009
Bosea_sp__Tri_49	0.009	0.01
Allokutzneria_albata	0.009	0.01
Deinococcus_sp__KNUC1210	0.009	0.008
Deinococcus_wulumuqiensis	0.009	0.01
Flammeovirga_sp__MY04	0.009	0.008
Lederbergia_lenta	0.009	0.008
Thermomonospora_curvata	0.009	0.008
Bacillus_shivajii	0.009	0.007
Cellulophaga_algicola	0.009	0.009
Kibdelosporangium_phytohabitans	0.009	0.011
Tessaracoccus_aquimaris	0.009	0.009
Thermomonospora_amylolytica	0.009	0.01
Actinoplanes_sp__N902_109	0.009	0.009
Castellaniella_defragrans	0.009	0.009
Caulobacter_sp__S6	0.009	0.01
Gillisia_sp__Hel1_33_143	0.009	0.009
Muricauda_oceani	0.009	0.01
Psychroflexus_torquis	0.009	0.008
Viridibacillus_sp__JNUCC_6	0.009	0.01
Wenzhouxiangella_sp__AB_CW3	0.009	0.007
Acidianus_manzaensis	0.009	0.009
Candidatus_Velamenicoccus_archaeovorus	0.009	0.009
Kaistia_sp__32K	0.009	0.008
Pediococcus_pentosaceus	0.009	0.008
Brevibacillus_choshinensis	0.009	0.01
Corallococcus_macrosporus	0.009	0.009
Flavobacterium_sp__M31R6	0.009	0.008
Paenibacillus_yonginensis	0.009	0.01
Pseudolabrys_taiwanensis	0.009	0.009
Rhizobacter_gummiphilus	0.009	0.01
Defluviitoga_tunisiensis	0.009	0.011
Flavobacterium_litorale	0.009	0.008
Muricauda_ruestringensis	0.009	0.008
Streptococcus_gordonii	0.009	0.007
Streptomyces_bryophytorum	0.009	0.009
Tessaracoccus_timonensis	0.009	0.01
Thermoanaerobacterium_xylanolyticum	0.009	0.008
Thioalkalivibrio_sulfidiphilus	0.009	0.01
Marinilactibacillus_sp__15R	0.009	0.012
Mycoplasmopsis_anatis	0.009	0.008
Couchioplanes_caeruleus	0.009	0.01
Mucilaginibacter_sp__F39_2	0.009	0.008
Flavobacterium_sp__MMS21_Er5	0.009	0.009
Myroides_albus	0.009	0.008
Heyndrickxia_vini	0.009	0.009
Kinneretia_sp__DAIF2	0.009	0.009
Methylococcus_sp__EFPC2	0.009	0.009
Pedobacter_sp__HDW13	0.009	0.008
Shinella_zoogloeoides	0.009	0.008
Sulfurimonas_gotlandica	0.009	0.008
Variovorax_sp__HW608	0.009	0.009
Aegicerativicinus_sediminis	0.009	0.007
Candidatus_Carsonella_ruddii	0.009	0.008
Desulfosediminicola_ganghwensis	0.009	0.01
Myroides_phaeus	0.009	0.008
Neotabrizicola_shimadae	0.009	0.008
Ottowia_sp__oral_taxon_894	0.009	0.007
Paenibacillus_lutimineralis	0.009	0.009
Pantoea_dispersa	0.009	0.01
Pluralibacter_gergoviae	0.009	0.009
Spiroplasma_poulsonii	0.009	0.009
Vibrio_campbellii	0.009	0.008
Crocosphaera_subtropica	0.009	0.007
Metamycoplasma_alkalescens	0.009	0.007
Paenibacillus_larvae	0.009	0.009
Pedobacter_mucosus	0.009	0.01
Streptococcus_mitis	0.009	0.008
Gimesia_panareensis	0.009	0.01
Hymenobacter_sp__5516S_25	0.009	0.01
Lactobacillus_terrae	0.009	0.007
Spirochaeta_africana	0.009	0.008
Acinetobacter_calcoaceticus	0.009	0.009
Caldanaerobacter_subterraneus	0.009	0.007
Dokdonella_koreensis	0.009	0.009
Flavobacterium_faecale	0.009	0.007
Gordonia_polyisoprenivorans	0.009	0.009
Listeria_ivanovii	0.009	0.007
Metabacillus_litoralis	0.009	0.008
Mycoplasmopsis_canis	0.009	0.009
Mycoplasmopsis_felis	0.009	0.008
Owenweeksia_hongkongensis	0.009	0.009
Desulfitobacterium_dehalogenans	0.009	0.009
Methylococcus_capsulatus	0.009	0.009
Mycoplasmopsis_bovigenitalium	0.009	0.008
Rothia_mucilaginosa	0.009	0.01
Sedimenticola_thiotaurini	0.009	0.009
Sulfurimicrobium_lacus	0.009	0.01
Actinomadura_sp__WMMB_499	0.009	0.009
Aeoliella_mucimassa	0.009	0.01
Candidatus_Endolissoclinum_faulkneri	0.009	0.008
Denitratisoma_oestradiolicum	0.009	0.009
Desulfomicrobium_sp__ZS1	0.009	0.008
Novibacillus_thermophilus	0.009	0.009
Pedobacter_sp__KBS0701	0.009	0.007
Pseudonocardia_dioxanivorans	0.009	0.008
Sphingobacterium_sp__ML3W	0.009	0.008
Acidianus_brierleyi	0.009	0.007
Acidovorax_sp__1608163	0.009	0.004
Aerococcus_sanguinicola	0.009	0.007
Ahniella_affigens	0.009	0.009
Aureimonas_populi	0.009	0.007
Marinithermus_hydrothermalis	0.009	0.008
Neobacillus_drentensis	0.009	0.009
Nosocomiicoccus_ampullae	0.009	0.008
Saccharopolyspora_gloriosae	0.009	0.01
Ureaplasma_urealyticum	0.009	0.007
Actinomarinicola_tropica	0.009	0.009
Flavobacterium_sediminis	0.009	0.008
Metamycoplasma_hyosynoviae	0.009	0.007
Zobellia_galactanivorans	0.009	0.01
Aromatoleum_petrolei	0.009	0.009
Flavobacterium_alkalisoli	0.009	0.007
Francisella_uliginis	0.009	0.007
Sulfurimonas_sp__HSL_3221	0.009	0.01
Actinomyces_procaprae	0.009	0.007
Caldithrix_abyssi	0.009	0.011
Chryseobacterium_lactis	0.009	0.009
Dickeya_zeae	0.009	0.009
Rhodospirillum_rubrum	0.009	0.009
Ezakiella_massiliensis	0.009	0.01
Nocardiopsis_alba	0.009	0.009
Oceanobacillus_zhaokaii	0.009	0.007
Pedobacter_schmidteae	0.009	0.009
Cardiobacterium_sp__Marseille_Q4385	0.009	0.009
Streptococcus_dysgalactiae	0.009	0.007
Achromobacter_deleyi	0.009	0.009
Cyclobacterium_amurskyense	0.009	0.009
Erysipelothrix_larvae	0.009	0.01
Methylococcus_sp__Mc7	0.009	0.008
Nocardia_terpenica	0.009	0.009
Thermosipho_melanesiensis	0.009	0.008
Actinomadura_madurae	0.009	0.009
Caldibacillus_thermoamylovorans	0.009	0.008
Microvenator_marinus	0.009	0.009
Psychrobacillus_glaciei	0.009	0.009
Stanieria_sp__NIES_3757	0.009	0.007
Winogradskyella_sp__PG_2	0.009	0.008
Amycolatopsis_sp__WQ_127309	0.009	0.01
Brochothrix_thermosphacta	0.009	0.008
Corallococcus_sp__EGB	0.009	0.008
Cupriavidus_metallidurans	0.009	0.009
Kordia_sp__SMS9	0.009	0.009
Sphaerotilus_sp__FB_5	0.009	0.01
Spiribacter_sp__E85	0.009	0.009
Alkalihalobacillus_krulwichiae	0.009	0.007
Amphibacillus_xylanus	0.009	0.008
Bosea_sp__F3_2	0.009	0.007
Conexibacter_sp__S30A1	0.009	0.008
Cutibacterium_granulosum	0.009	0.01
Ideonella_dechloratans	0.009	0.008
Phenylobacterium_parvum	0.009	0.007
Actinomadura_sp__0K00032	0.009	0.008
Flavobacterium_sp__SLB02	0.009	0.008
Lactococcus_raffinolactis	0.009	0.009
Oceanobacillus_kimchii	0.009	0.008
Actinoplanes_sp__OR16	0.009	0.008
Aeribacillus_pallidus	0.009	0.007
Capnocytophaga_stomatis	0.009	0.007
Devosia_ginsengisoli	0.009	0.008
Histophilus_somni	0.009	0.006
Sodalis_ligni	0.009	0.009
Tenacibaculum_todarodis	0.009	0.009
Chamaesiphon_minutus	0.009	0.008
Gemmatimonas_aurantiaca	0.009	0.009
Isosphaera_pallida	0.009	0.009
Magnetospirillum_magneticum	0.009	0.009
Methanosarcina_mazei	0.009	0.023
Staphylococcus_succinus	0.009	0.009
Formosa_agariphila	0.009	0.009
Mycoplasmopsis_bovis	0.009	0.008
Streptomonospora_litoralis	0.009	0.009
Microvirga_sp__R24	0.009	0.008
Nitrogeniibacter_mangrovi	0.009	0.009
Roseiflexus_sp__RS_1	0.009	0.009
Salisediminibacterium_selenitireducens	0.009	0.007
Cardiobacterium_hominis	0.009	0.008
Nonlabens_spongiae	0.009	0.008
Paraliobacillus_zengyii	0.009	0.009
Actinomadura_graeca	0.009	0.009
Actinomyces_sp__oral_taxon_414	0.009	0.008
Hymenobacter_radiodurans	0.009	0.009
Lentzea_sp__HUAS12	0.009	0.008
Nocardiopsis_dassonvillei	0.009	0.008
Spirosoma_aureum	0.009	0.009
Bacillus_infantis	0.009	0.008
Gramella_fulva	0.009	0.009
Halobacteriovorax_marinus	0.009	0.007
Laceyella_sacchari	0.009	0.009
Lysinibacillus_timonensis	0.009	0.009
Sutterella_megalosphaeroides	0.009	0.008
Arachidicoccus_ginsenosidivorans	0.009	0.008
Azospirillum_thiophilum	0.009	0.007
Fischerella_sp__NIES_3754	0.009	0.009
Lautropia_mirabilis	0.009	0.01
Lentilactobacillus_hilgardii	0.009	0.007
Leptotrichia_buccalis	0.009	0.007
Chryseobacterium_sp__3008163	0.009	0.009
Nostoc_sp__MS1	0.009	0.007
Vogesella_sp__LIG4	0.009	0.009
Cutibacterium_acnes	0.009	0.008
Cytobacillus_kochii	0.009	0.008
Methylobacterium_nodulans	0.009	0.01
Paraburkholderia_aromaticivorans	0.009	0.008
Pseudosulfitobacter_pseudonitzschiae	0.009	0.009
Sulfuricaulis_limicola	0.009	0.009
Arachidicoccus_terrestris	0.009	0.01
Bacillus_aquiflavi	0.009	0.008
Flavobacterium_cyclinae	0.009	0.008
Paenibacillus_swuensis	0.009	0.007
Paludibacterium_paludis	0.009	0.009
Polaribacter_sp__MED152	0.009	0.008
Spiroplasma_platyhelix	0.009	0.009
Trichormus_azollae	0.009	0.006
Corynebacterium_striatum	0.009	0.008
Mongoliitalea_daihaiensis	0.009	0.007
Priestia_flexa	0.009	0.008
Saccharothrix_espanaensis	0.009	0.009
Campylobacter_insulaenigrae	0.009	0.007
Candidatus_Desulfovibrio_trichonymphae	0.009	0.008
Echinicola_sp__20G	0.009	0.01
Jiangella_alkaliphila	0.009	0.008
Leadbetterella_byssophila	0.009	0.008
Moellerella_wisconsensis	0.009	0.006
Thermomicrobium_roseum	0.009	0.009
Arthrobacter_agilis	0.008	0.009
Azoarcus_sp__DD4	0.008	0.009
Herbaspirillum_seropedicae	0.008	0.008
Kitasatospora_setae	0.008	0.008
Pedobacter_sp__SW_16	0.008	0.009
Phreatobacter_stygius	0.008	0.009
Spiroplasma_sp__BIUS_1	0.008	0.007
Lacinutrix_sp__WUR7	0.008	0.008
Roseimaritima_ulvae	0.008	0.009
Stieleria_maiorica	0.008	0.009
Abyssicoccus_albus	0.008	0.008
Arcobacter_porcinus	0.008	0.008
Azoarcus_olearius	0.008	0.008
Granulicella_mallensis	0.008	0.009
Micromonospora_carbonacea	0.008	0.008
Pedobacter_steynii	0.008	0.008
Streptococcus_urinalis	0.008	0.006
Desulforamulus_ferrireducens	0.008	0.009
Hypericibacter_terrae	0.008	0.009
Ligilactobacillus_ruminis	0.008	0.009
Mycoplasma_putrefaciens	0.008	0.008
Phytohabitans_suffuscus	0.008	0.009
Stappia_indica	0.008	0.008
Aequorivita_sublithincola	0.008	0.008
Alkalilimnicola_ehrlichii	0.008	0.009
Campylobacter_novaezeelandiae	0.008	0.008
Campylobacter_sp__RM10537	0.008	0.007
Leptospira_interrogans	0.008	0.007
Lysinibacillus_agricola	0.008	0.008
Starkeya_sp__ORNL1	0.008	0.008
Thermobispora_bispora	0.008	0.008
Xylophilus_rhododendri	0.008	0.008
Bifidobacterium_pseudocatenulatum	0.008	0.009
Chromobacterium_sp__ATCC_53434	0.008	0.01
Pseudodesulfovibrio_sediminis	0.008	0.01
Salinicoccus_halodurans	0.008	0.009
Streptacidiphilus_sp__P02_A3a	0.008	0.008
Deinococcus_sp__TS_293	0.008	0.008
Streptomyces_spectabilis	0.008	0.009
Acidovorax_carolinensis	0.008	0.006
Ancylobacter_sp__TS_1	0.008	0.007
Chryseobacterium_gleum	0.008	0.009
Collimonas_fungivorans	0.008	0.009
Enterococcus_raffinosus	0.008	0.007
Flavobacterium_nitrogenifigens	0.008	0.007
Melioribacter_roseus	0.008	0.007
Mesomycoplasma_molare	0.008	0.008
Microlunatus_soli	0.008	0.008
Pedobacter_heparinus	0.008	0.009
Pseudomonas_otitidis	0.008	0.009
Xianfuyuplasma_coldseepsis	0.008	0.008
Capnocytophaga_endodontalis	0.008	0.009
Hydrogenimonas_urashimensis	0.008	0.008
Metamycoplasma_cloacale	0.008	0.006
Micropruina_glycogenica	0.008	0.01
Paenibacillus_odorifer	0.008	0.008
Polynucleobacter_necessarius	0.008	0.007
Rubrobacter_radiotolerans	0.008	0.008
Salipiger_profundus	0.008	0.009
Sphingomonas_alpina	0.008	0.009
Staphylococcus_gallinarum	0.008	0.009
Wenzhouxiangella_marina	0.008	0.009
Brucella_anthropi	0.008	0.007
Polaribacter_sp__NJDZ03	0.008	0.009
Sulfuritortus_calidifontis	0.008	0.008
Aggregatimonas_sangjinii	0.008	0.01
Bacillus_sp__1NLA3E	0.008	0.009
Flagellatimonas_centrodinii	0.008	0.008
Flavobacterium_sp__K5_23	0.008	0.008
Gracilinema_caldarium	0.008	0.008
Paenibacillus_bovis	0.008	0.01
Salinispira_pacifica	0.008	0.009
Thermus_thermophilus	0.008	0.009
Caulobacter_flavus	0.008	0.009
Deinococcus_irradiatisoli	0.008	0.008
Microvirga_ossetica	0.008	0.007
Rhodoferax_koreense	0.008	0.008
Calothrix_sp__PCC_7507	0.008	0.007
Caulobacter_rhizosphaerae	0.008	0.009
Stieleria_neptunia	0.008	0.008
Anatilimnocola_aggregata	0.008	0.009
Bacillus_sp__Y1	0.008	0.006
Ferrovibrio_terrae	0.008	0.009
Salegentibacter_sp__T436	0.008	0.006
Egibacter_rhizosphaerae	0.008	0.009
Eubacterium_maltosivorans	0.008	0.008
Mycoplasmopsis_fermentans	0.008	0.008
Pedobacter_ginsengisoli	0.008	0.007
Tessaracoccus_flavescens	0.008	0.015
Thermosipho_ferrireducens	0.008	0.007
Collimonas_arenae	0.008	0.008
Croceicoccus_marinus	0.008	0.007
Cyanobium_gracile	0.008	0.007
Faecalibacterium_duncaniae	0.008	0.008
Liquorilactobacillus_hordei	0.008	0.007
Salinisphaera_sp__LB1	0.008	0.007
Brachybacterium_saurashtrense	0.008	0.009
Cellulosilyticum_sp__WCF_2	0.008	0.009
Chromobacterium_violaceum	0.008	0.008
Chryseobacterium_sp__6424	0.008	0.01
Evansella_sp__LMS18	0.008	0.007
Gracilibacillus_salitolerans	0.008	0.009
Myxococcus_hansupus	0.008	0.008
Neoehrlichia_mikurensis	0.008	0.007
Panacibacter_ginsenosidivorans	0.008	0.01
Rhizobacter_sp__AJA081_3	0.008	0.01
Alloactinosynnema_sp__L_07	0.008	0.006
Apilactobacillus_kunkeei	0.008	0.008
Pedobacter_aquae	0.008	0.009
Antarcticibacterium_flavum	0.008	0.008
Desulfosporosinus_meridiei	0.008	0.008
Dietzia_kunjamensis	0.008	0.006
Gephyromycinifex_aptenodytis	0.008	0.01
Lichenicola_cladoniae	0.008	0.009
Pseudomonas_protegens	0.008	0.008
Cupriavidus_campinensis	0.008	0.009
Kineobactrum_salinum	0.008	0.008
Oryzomicrobium_terrae	0.008	0.008
Paenisporosarcina_antarctica	0.008	0.007
Pararhodospirillum_photometricum	0.008	0.009
Amycolatopsis_sp__CA_230715	0.008	0.008
Deinococcus_sp__AJ005	0.008	0.007
Flavobacterium_commune	0.008	0.008
Paracoccus_zhejiangensis	0.008	0.008
Ureibacillus_thermophilus	0.008	0.007
Acidobacterium_capsulatum	0.008	0.009
Bifidobacterium_catenulatum	0.008	0.009
Brevundimonas_naejangsanensis	0.008	0.007
Crateriforma_conspicua	0.008	0.008
Ferruginibacter_lapsinanis	0.008	0.009
Gramella_flava	0.008	0.008
Paenibacillus_barcinonensis	0.008	0.008
Raineyella_fluvialis	0.008	0.009
Sulfuritalea_hydrogenivorans	0.008	0.009
Usitatibacter_palustris	0.008	0.008
Vibrio_alfacsensis	0.008	0.006
Candidatus_Hepatoplasma_crinochetorum	0.008	0.008
Chitinimonas_arctica	0.008	0.007
Chryseobacterium_capnotolerans	0.008	0.007
Ferruginibacter_sp__KIS38_8	0.008	0.008
Microlunatus_sagamiharensis	0.008	0.01
Winogradskyella_sp__PC_19	0.008	0.007
Campylobacter_armoricus	0.008	0.007
Liquorilactobacillus_nagelii	0.008	0.006
Natronosporangium_hydrolyticum	0.008	0.007
Orrella_dioscoreae	0.008	0.008
Pedobacter_suwonensis	0.008	0.009
Qipengyuania_flava	0.008	0.01
Sphingomonas_morindae	0.008	0.009
Streptococcus_salivarius	0.008	0.009
Streptomyces_sp__CB01881	0.008	0.009
Turneriella_parva	0.008	0.008
Ureibacillus_thermosphaericus	0.008	0.007
Bartonella_apis	0.008	0.007
Francisella_sp__FSC1006	0.008	0.006
Granulicatella_elegans	0.008	0.007
Leptolyngbya_sp__BL0902	0.008	0.008
Paenibacillus_sp__FSL_R5_0912	0.008	0.008
Pelagovum_pacificum	0.008	0.009
Shinella_sp__HZN7	0.008	0.008
Bergeyella_cardium	0.008	0.008
Bosea_vaviloviae	0.008	0.009
Flavobacterium_sp__xlx_214	0.008	0.008
Methanococcus_aeolicus	0.008	0.007
[truncated: 5,148 more rows]
