# Supplementary material for: Comparative Rumen Metagenome and CAZyme Profiles in Cattle and Buffaloes: Implications for Methane Yield and Rumen Fermentation on a Common Diet
Source: Microorganisms. 2023 Dec 27;12(1):47. doi: 10.3390/microorganisms12010047 (PMC10818812; doi:10.3390/microorganisms12010047)
Supplement: Supplementary file 1 [file microorganisms-12-00047-s001.zip › Supplementary File S2_new.xlsx]

## Sheet: Contig details
Contig Details
Sample	Total Contigs	Total bps	Max Contig length (bps)	Avrg Contig length (bps)	N50 (bps)
B51	179384	150965613	58567	841	822
B52	181651	144502239	56000	795	760
B53	143284	107402758	107000	749	710
B54	146155	109249828	40103	747	706
B55	118786	94420815	136360	749	747
Average	153852	1.21308e+08	79606	776.2	749
C51	123872	100920284	46400	814	771
C53	148166	131738330	129474	889	855
C54	142305	108311632	177582	761	712
C55	120648	91940064	54846	762	724
C56	180766	152954636	120558	846	803
Average	143151	1.17173e+08	105772	814.4	773
Sample	Total Contigs	Total bps	Max Contig length (bps)	Avrg Contig length (bps)	N50 (bps)
B51	179384	150965613	58567	841	822
B52	181651	144502239	56000	795	760
B53	143284	107402758	107000	749	710
B54	146155	109249828	40103	747	706
B55	118786	94420815	136360	749	747
C51	123872	100920284	46400	814	771
C53	148166	131738330	129474	889	855
C54	142305	108311632	177582	761	712
C55	120648	91940064	54846	762	724
C56	180766	152954636	120558	846	803
Total	1485017	1192406199	926890	7953	7610
Million	1.48502

## Sheet: Cazyme Classes
CAZYme abundance (%) Class
				Buffalo (B)			Cattle (C)
	B51	B52	B53	B54	B55	C51	C53	C54	C55	C56		CAZy_Classes	Buffalo	Cattle	Pvalues	FDR	Statistics
CBM	8.51624	5.62354	6.84098	7.34731	7.27679	6.04869	6.38629	6.48384	6.08462	6.92904		CBM	7.02418	6.37688	0.19698	0.39164	1.4912
CE	7.52246	7.98466	9.01171	8.29336	7.97261	9.03855	7.56047	8.95513	8.85521	8.93777		CE	8.23601	8.7435	0.20632	0.39164	-1.3771
GH	68.2666	70.5373	69.4293	69.8609	68.6393	68.9509	66.995	68.9522	70.6853	67.379		GH	69.4889	68.7596	0.36443	0.45554	0.9729
GT	14.64	14.9602	13.7242	13.9487	13.9994	15.4949	17.5578	14.677	13.0877	15.6231		GT	14.2574	15.0797	0.23498	0.39164	-1.3567
PL	1.05478	0.894286	0.993834	0.549774	2.11195	0.466974	1.50039	0.931868	1.28718	1.131		PL	0.993528	1.04037	0.86098	0.86098	0.18169
Wilcoxon GH	C	B		Wilcoxon GT	C	B		Wilcoxon CE	C	B			Wilcoxon CBM	C	B
Theoretical median	0	0		Theoretical median	0	0		Theoretical median	0	0			Theoretical median	0	0
Actual median	62	61.8		Actual median	18.95	18.05		Actual median	9.43	9.34			Actual median	8.44	8.74
Number of values	5	5		Number of values	5	5		Number of values	5	5			Number of values	5	5
Wilcoxon Signed Rank Test				Wilcoxon Signed Rank Test				Wilcoxon Signed Rank Test					Wilcoxon Signed Rank Test
Sum of signed ranks (W)	15	15		Sum of signed ranks (W)	15	15		Sum of signed ranks (W)	15	15			Sum of signed ranks (W)	15	15
Sum of positive ranks	15	15		Sum of positive ranks	15	15		Sum of positive ranks	15	15			Sum of positive ranks	15	15
Sum of negative ranks	0	0		Sum of negative ranks	0	0		Sum of negative ranks	0	0			Sum of negative ranks	0	0
P value (two tailed)	0.0625	0.0625		P value (two tailed)	0.0625	0.0625		P value (two tailed)	0.0625	0.0625			P value (two tailed)	0.0625	0.0625
Exact or estimate?	Exact	Exact		Exact or estimate?	Exact	Exact		Exact or estimate?	Exact	Exact			Exact or estimate?	Exact	Exact
P value summary	ns	ns		P value summary	ns	ns		P value summary	ns	ns			P value summary	ns	ns
Significant (alpha=0.05)?	No	No		Significant (alpha=0.05)?	No	No		Significant (alpha=0.05)?	No	No			Significant (alpha=0.05)?	No	No
How big is the discrepancy?				How big is the discrepancy?				How big is the discrepancy?					How big is the discrepancy?
Discrepancy	62	61.8		Discrepancy	18.95	18.05		Discrepancy	9.43	9.34			Discrepancy	8.44	8.74
Wilcoxon PL	C	B		Wilcoxon AA	C	B		Wilcoxon Others	C	B
Theoretical median	0	0		Theoretical median	0	0		Theoretical median	0	0
Actual median	1.39	1.58		Actual median	0.05	0.07		Actual median	0	0.06
Number of values	5	5		Number of values	5	5		Number of values	5	5
Wilcoxon Signed Rank Test				Wilcoxon Signed Rank Test				Wilcoxon Signed Rank Test
Sum of signed ranks (W)	15	15		Sum of signed ranks (W)	10	15		Sum of signed ranks (W)	3	15
Sum of positive ranks	15	15		Sum of positive ranks	10	15		Sum of positive ranks	3	15
Sum of negative ranks	0	0		Sum of negative ranks	0	0		Sum of negative ranks	0	0
P value (two tailed)	0.0625	0.0625		P value (two tailed)	0.125	0.0625		P value (two tailed)	0.5	0.0625
Exact or estimate?	Exact	Exact		Exact or estimate?	Exact	Exact		Exact or estimate?	Exact	Exact
P value summary	ns	ns		P value summary	ns	ns		P value summary	ns	ns
Significant (alpha=0.05)?	No	No		Significant (alpha=0.05)?	No	No		Significant (alpha=0.05)?	No	No
How big is the discrepancy?				How big is the discrepancy?				How big is the discrepancy?
Discrepancy	1.39	1.58		Discrepancy	0.05	0.07		Discrepancy	0	0.06
Sample wise data of CAZyme abundance
	B51	B52	B53	B54	B55	Average	Buffalo		C51	C53	C54	C55	C56	Average	Cattle
CBM1	0.00173078	0	0.00124937	0	0.0041182	0.00141967	0.141967		0	0	0	0	0	0	0
CBM11	0.000898728	0.0011725	0.000881469	0.00258265	0.00127815	0.0013627	0.13627		0.000250831	0.00101899	0.00103306	0.00121073	0.000732742	0.00084927	0.084927
CBM13	0.0159077	0.00658595	0.0061908	0.00702941	0.00813811	0.00877039	0.877039		0.00685193	0.00590219	0.00605946	0.00694359	0.0062406	0.00639955	0.639955
CBM20	0.00464821	0.00383253	0.00671116	0.00453151	0.00438675	0.00482203	0.482203		0.00563795	0.00686849	0.00660833	0.00514074	0.00463547	0.00577819	0.577819
CBM22	0.00346367	0.000251026	0.00205606	0.00078617	0.000927071	0.0014968	0.14968		0	0	0	0.000276093	0.00029809	0.000114837	0.0114837
CBM25	0	0	0.000318683	0.00118076	0	0.000299889	0.0299889		0.000371942	0	0	0	0	7.43884e-05	0.00743884
CBM26	0.000536387	0	0.000318683	0.000666388	0	0.000304292	0.0304292		0	0.00015305	0	0	0	3.061e-05	0.003061
CBM3	0.00232055	0.000125601	0	0	0.00134033	0.000757297	0.0757297		0.000252853	0	0	0	9.42531e-05	6.94213e-05	0.00694213
CBM30	0.000352285	0	0.00107898	0.000677874	0	0.000421827	0.0421827		0	0.000498419	0.000753134	0.000718459	0.000435514	0.000481105	0.0481105
CBM32	0.00423791	0.00479963	0.00442854	0.00406643	0.00678441	0.00486338	0.486338		0.00418169	0.000892314	0.00330073	0.00664627	0.00498947	0.0040021	0.40021
CBM34	0.000634566	0.000206129	0.000420864	0.00128595	0.000980441	0.00070559	0.070559		0	0.000246614	0	0	0.000852631	0.000219849	0.0219849
CBM35	0.00175149	0.00102196	0.00246844	0.0017365	0.00178311	0.0017523	0.17523		0.00189602	0.00193426	0.0016647	0.00217515	0.00222944	0.00197992	0.197992
CBM4	0.000404053	0.00117837	0	0.00093189	0	0.000502862	0.0502862		0.000343946	0.00059179	0.00128898	0	0	0.000444943	0.0444943
CBM48	0.01393	0.00939441	0.00973408	0.0148619	0.0039755	0.0103792	1.03792		0.00788531	0.00990215	0.00892877	0.00777915	0.0087249	0.00864406	0.864406
CBM50	0.00534509	0.00505428	0.00496526	0.00499997	0.00143977	0.00436087	0.436087		0.00537241	0.00764002	0.0031291	0.00242598	0.00755184	0.00522387	0.522387
CBM51	0	0.000503256	0	0	0.000334727	0.000167596	0.0167596		0	0.000392352	0	0.000149317	0.000710841	0.000250502	0.0250502
CBM57	0.000470708	0.000191255	0.000241841	0.000420773	0.00235936	0.000736787	0.0736787		0.00095337	0.00223246	0	0.00039024	0	0.000715214	0.0715214
CBM6	0.0139557	0.0139978	0.0143722	0.0201476	0.0136743	0.0152295	1.52295		0.0160062	0.0123958	0.0197717	0.0209433	0.0184309	0.0175096	1.75096
CBM61	0.000781309	0.000148188	0.000296314	0.00204798	0.00107728	0.000870214	0.0870214		0.000432283	0	0	0.000267716	0.000617586	0.000263517	0.0263517
CBM62	0.000755009	0.000668633	0	0.000358668	0.00192695	0.000741852	0.0741852		0.000303235	0.000265712	0	0	0.000469615	0.000207712	0.0207712
CBM67	0.00245331	0.000941675	0.000362844	0.000235712	0.00343569	0.00148585	0.148585		0.00225298	0.0031224	0.000656489	0.000833621	0.00115687	0.00160447	0.160447
CBM72	0	0.000454447	0.00106757	0.00127409	0.000879345	0.000735091	0.0735091		0.00067405	0.00112475	0.000945636	0.00112251	0.00106207	0.000985805	0.0985805
CBM77	0.00102512	0	0	0	0.00118431	0.000441885	0.0441885		0	0.000812189	0.000252624	0	0	0.000212963	0.0212963
CBM79	0.00700898	0	0.00303909	0.00055625	0.000328854	0.00218664	0.218664		0	0.00110796	0	0	0.000350136	0.00029162	0.029162
CBM88	0	0	0	0	0	0	0		0	0.000325428	0.000322603	0.000267558	0.000284547	0.000240027	0.0240027
CBM9	0	0.000293373	0.000331995	0	0.00123205	0.000371483	0.0371483		0.00076705	0	0.00047027	0.000215841	0.000164089	0.00032345	0.032345
CBM91	0.00255075	0.00541433	0.00787547	0.00309464	0.0111831	0.00602366	0.602366		0.0060529	0.00643555	0.00965285	0.00333997	0.00925878	0.00694801	0.694801
CE1	0.0356209	0.0360003	0.0427435	0.0435295	0.0365609	0.038891	3.8891		0.0503433	0.0311421	0.0434189	0.0451859	0.0446277	0.0429436	4.29436
CE11	0.00440575	0.00506302	0.00527419	0.0067289	0.00169515	0.0046334	0.46334		0.00582633	0.00640142	0.00635139	0.00449917	0.00490597	0.00559686	0.559686
CE12	0.00434618	0.00603669	0.0049084	0.00709585	0.00598197	0.00567382	0.567382		0.00186016	0.0027659	0.00336846	0.00637597	0.00644409	0.00416291	0.416291
CE15	0.00372193	0.00523319	0.00547133	0.00284947	0.0074548	0.00494614	0.494614		0.00579491	0.00373804	0.00717734	0.00559221	0.00600666	0.00566183	0.566183
CE19	0.000992089	0.000886067	0.0015907	0.000451114	0.00187282	0.00115856	0.115856		0.00023244	0.00273581	0	0.000318264	0	0.000657303	0.0657303
CE2	0.000369999	0.00145837	0.00145235	0.000910037	0.00260887	0.00135993	0.135993		0.00216351	0.00175692	0.00169507	0.00172992	0.00202099	0.00187328	0.187328
CE20	0.00194205	0.00275102	0.00438283	0.00372618	0.00353585	0.00326759	0.326759		0.00433281	0.00456865	0.0044431	0.00439909	0.0060498	0.00475869	0.475869
CE4	0.00491992	0.00492674	0.00452394	0.00381271	0.000803344	0.00379733	0.379733		0.00355449	0.00349385	0.0026588	0.00260713	0.00275657	0.00301417	0.301417
CE6	0.0122547	0.00866621	0.00944856	0.00725226	0.00946297	0.00941694	0.941694		0.00797721	0.00749532	0.00971085	0.00930454	0.00809441	0.00851646	0.851646
CE7	0.00176382	0.00141022	0.00261854	0.00179683	0.00296234	0.00211035	0.211035		0.00131708	0.00171467	0.00270077	0.00194729	0.00205025	0.00194601	0.194601
CE8	0.00398952	0.00689459	0.00687083	0.00459127	0.00678712	0.00582667	0.582667		0.00533669	0.00944927	0.00621315	0.00583433	0.00574126	0.00651494	0.651494
CE9	0.000897737	0.000520147	0.000831846	0.000189468	0	0.00048784	0.048784		0.00164657	0.000342804	0.00181344	0.000758319	0.000680024	0.00104823	0.104823
GH0	0.00125908	0.00110891	0	0.000399481	0.00110856	0.000775206	0.0775206		0.00115979	0.000688663	0	0	0.000638266	0.000497344	0.0497344
GH1	0	0.0103787	0.00397789	0.00039852	0.00842001	0.00463503	0.463503		0.00115405	0.000386529	0.00139239	0.000197341	0.00083861	0.000793782	0.0793782
GH10	0.0230219	0.0180359	0.0214957	0.0248544	0.0202953	0.0215406	2.15406		0.0170589	0.0145602	0.0228969	0.0236388	0.0174758	0.0191261	1.91261
GH105	0.00787993	0.00628472	0.0124599	0.00739921	0.00392537	0.00758983	0.758983		0.00495421	0.00461327	0.00758628	0.00700177	0.00777316	0.00638574	0.638574
GH106	0.00407169	0.00365767	0.0036576	0.00539769	0.00647077	0.00465108	0.465108		0.00437204	0.00415344	0.00375994	0.00421115	0.0053602	0.00437135	0.437135
GH109	0.00397749	0.00783341	0.00488694	0.00677358	0.00473357	0.005641	0.5641		0.00472985	0.00378422	0.00624678	0.00539297	0.0054227	0.0051153	0.51153
GH11	0.00757168	0.00152492	0.00336832	0.0029131	0.00123802	0.00332321	0.332321		0.000651629	0.00251356	0.00175137	0.00136747	0.00230857	0.00171852	0.171852
GH115	0.00641035	0.00687799	0.00516133	0.00586892	0.00846009	0.00655574	0.655574		0.00353477	0.00395004	0.00556377	0.0045133	0.00359838	0.00423205	0.423205
GH116	0.000626812	0.000554636	0.00164815	0.00167071	0.00161882	0.00122383	0.122383		0.000458263	0.00130562	0.0016589	0.00157694	0.00142018	0.00128398	0.128398
GH120	0.00134944	0.00210488	0.00400972	0.0085768	0.00173236	0.00355464	0.355464		0.00347029	0.00425672	0.00301234	0.00382294	0.00387083	0.00368662	0.368662
GH125	0.00170075	0.00220486	0.00149301	0.00172135	0.00193012	0.00181002	0.181002		0.00365778	0.00138068	0.00248522	0.00167383	0.000901927	0.00201989	0.201989
GH127	0.0021992	0.007129	0.00678703	0.00545143	0.00715005	0.00574334	0.574334		0.00700611	0.00711414	0.00498364	0.00492241	0.00700526	0.00620631	0.620631
GH13	0.0896312	0.0784559	0.0696613	0.0916327	0.072096	0.0802954	8.02954		0.0813037	0.08979	0.0581258	0.059759	0.065723	0.0709403	7.09403
GH130	0.00760595	0.0126245	0.00986856	0.0178642	0.00793312	0.0111793	1.11793		0.0122141	0.0100803	0.0122591	0.0145869	0.0143289	0.0126938	1.26938
GH133	0.0105396	0.00625395	0.0113396	0.0100099	0.00132584	0.00789376	0.789376		0.0107649	0.0110788	0.0085452	0.00760618	0.00571434	0.00874188	0.874188
GH137	0.000712897	0.000191255	0.000241841	0.000739229	0.0037108	0.0011192	0.11192		0.000354554	0.000875749	0.000341296	0.000644292	0	0.000443178	0.0443178
GH138	0.000367631	0.000394151	0.000997964	0.000407388	0.000735086	0.000580444	0.0580444		0	0.00133522	0	0	0	0.000267044	0.0267044
GH139	0.00032354	0	0.000299402	0.000330567	0.000620178	0.000314737	0.0314737		0	0.00145799	0	0	0	0.000291597	0.0291597
GH140	0.000394554	0.000452164	0.00101835	0.00165771	0.000392746	0.000783104	0.0783104		0	0.00136198	0.000141076	0.000503784	0.000490604	0.000499489	0.0499489
GH141	0.000479118	0.00109296	0.00175198	0.000256212	0	0.000716055	0.0716055		0.00121076	0.00335487	0.000686279	0.000949116	0.00100516	0.00144124	0.144124
GH142	0.000384904	0.000737338	0.0007297	0.000684666	0	0.000507322	0.0507322		0.000243273	0.00117181	0.000753821	0.00103426	9.73802e-05	0.000660109	0.0660109
GH143	0.000384904	0	0.000469167	0	0.000735086	0.000317832	0.0317832		0.000243273	0.000883297	0	0	0	0.000225314	0.0225314
GH146	0.00498722	0.00705043	0.00468566	0.00692855	0.00211786	0.00515394	0.515394		0.00689371	0.00410688	0.00928671	0.00915713	0.00627307	0.0071435	0.71435
GH154	0	0.000241698	0.00280598	0.00312996	0	0.00123553	0.123553		0.00209164	0.000663266	0.000820099	0.00214604	0.00151182	0.00144657	0.144657
GH16	0.00995535	0.00713239	0.00671754	0.00743414	0.00615628	0.00747914	0.747914		0.00854108	0.00856185	0.00817119	0.0077999	0.00720766	0.00805634	0.805634
GH163	0.000266191	0.00047553	0	0	0	0.000148344	0.0148344		0.00094182	0	0.00100806	0.0006966	0.000821241	0.000693545	0.0693545
GH171	0.000844582	0.00462941	0.00150602	0.00311873	0.00165988	0.00235172	0.235172		0.00442098	0.00381066	0.00269789	0.00336505	0.00416367	0.00369165	0.369165
GH172	0.000321183	0	0.00034785	0.000314898	0	0.000196786	0.0196786		0.000289378	0	0.000215907	0	0.00046061	0.000193179	0.0193179
GH18	0.00104732	0.00534097	0.00239727	0.00181828	0.00375268	0.00287131	0.287131		0.00249224	0.00429603	0.00240997	0.00174261	0.00276394	0.00274096	0.274096
GH19	0.000857585	0	0	0.000496931	0	0.000270903	0.0270903		0.000154034	0.000248555	0	0	0.000234916	0.000127501	0.0127501
GH2	0.0219831	0.0279848	0.0261223	0.023839	0.031218	0.0262294	2.62294		0.0329074	0.0341082	0.0359521	0.0317851	0.0380111	0.0345528	3.45528
GH20	0.00460486	0.0093929	0.00531476	0.00763958	0.0105274	0.00749591	0.749591		0.011595	0.00910135	0.0098193	0.0102718	0.0131563	0.0107887	1.07887
GH23	0.00477505	0.00525207	0.00447266	0.0067938	0.00375117	0.00500895	0.500895		0.00619857	0.0105349	0.00550188	0.00683884	0.00697662	0.00721016	0.721016
GH24	0.000667893	0.00514953	0.000897088	9.27465e-05	0.000168871	0.00139523	0.139523		0.00137909	0.0011884	0.00169264	0.000929515	0.00276498	0.00159093	0.159093
GH25	0.0050011	0.00424063	0.00657301	0.00331874	0.00575535	0.00497777	0.497777		0.00400903	0.0043919	0.00510947	0.00456153	0.00487647	0.00458968	0.458968
GH26	0.00591276	0.00575276	0.00649226	0.00538873	0.00698803	0.00610691	0.610691		0.00582177	0.00640082	0.0072791	0.00712178	0.00836984	0.00699866	0.699866
GH27	0.013216	0.0107185	0.0110879	0.0121316	0.00875727	0.0111823	1.11823		0.0105668	0.010149	0.00937507	0.00840761	0.00795199	0.0092901	0.92901
GH28	0.00706497	0.0151676	0.00946397	0.0129176	0.0132789	0.0115786	1.15786		0.00939036	0.0116185	0.0139565	0.0112666	0.0133757	0.0119215	1.19215
GH29	0.0109823	0.0173154	0.0153425	0.0167017	0.016914	0.0154512	1.54512		0.0134438	0.0174062	0.0207272	0.0213609	0.0177206	0.0181317	1.81317
GH3	0.0804405	0.0881561	0.0790524	0.0774914	0.0825584	0.0815397	8.15397		0.0836175	0.0692572	0.0842954	0.0806243	0.0743325	0.0784254	7.84254
GH30	0.00939671	0.0044858	0.00648399	0.00274826	0.0071657	0.00605609	0.605609		0.00507036	0.00450763	0.00478879	0.00547976	0.00347787	0.00466488	0.466488
GH31	0.0252948	0.0273406	0.0293573	0.0313134	0.0242181	0.0275049	2.75049		0.0270307	0.0303918	0.0221949	0.0308039	0.0250361	0.0270915	2.70915
GH32	0.00536964	0.0139897	0.00961276	0.00847212	0.00977592	0.00944402	0.944402		0.00394146	0.00654848	0.00402262	0.00825141	0.00594188	0.00574117	0.574117
GH33	0.00255433	0.00449173	0.00439453	0.00354862	0.00584786	0.00416742	0.416742		0.00591785	0.00669071	0.00538432	0.00546148	0.0014002	0.00497091	0.497091
GH35	0.0042946	0.00349509	0.00760179	0.00521669	0.005013	0.00512423	0.512423		0.00303441	0.00175146	0.00390893	0.00556337	0.00493749	0.00383913	0.383913
GH36	0.00349492	0.00809521	0.00547016	0.00570686	0.000893226	0.00473207	0.473207		0.00790015	0.00477876	0.00563034	0.00700057	0.00683368	0.0064287	0.64287
GH38	0	0.000675816	0.00104584	0.00238833	0	0.000821997	0.0821997		0.00172059	0.0016423	0.00116603	0.000670902	0.00140073	0.00132011	0.132011
GH39	0.00377283	0.000508694	0.00212993	0.000339656	0.00124283	0.00159879	0.159879		0	0.000699733	0.000714793	0.00105915	0.0002454	0.000543815	0.0543815
GH4	0	0.000848738	0.00162478	0	0.000343546	0.000563412	0.0563412		9.48968e-05	0	0.00192017	0.00150218	0.00102066	0.00090758	0.090758
GH43	0.0878037	0.0831555	0.086201	0.0764266	0.057845	0.0782864	7.82864		0.0799504	0.0722252	0.0886851	0.0980197	0.0800131	0.0837787	8.37787
GH45	0.00998077	0.00155982	0.00601539	0.00267333	0.007004	0.00544666	0.544666		0.00166742	0.00237669	0.00222911	0.00142819	0.00212191	0.00196466	0.196466
GH5	0.03545	0.0215863	0.0327578	0.0218914	0.0385162	0.0300403	3.00403		0.0189829	0.0230464	0.0203784	0.0211045	0.0241473	0.0215319	2.15319
GH51	0.0132682	0.0138666	0.0152139	0.0151335	0.0134623	0.0141889	1.41889		0.0208273	0.0156435	0.0230454	0.0208372	0.0236704	0.0208048	2.08048
GH53	0.0027631	0.00335533	0.00281788	0.0043337	0.00696947	0.0040479	0.40479		0.00663147	0.00228384	0.00539412	0.00484521	0.00580137	0.0049912	0.49912
GH54	0.000370879	0.00138351	0.000640647	0.000906982	0	0.000660403	0.0660403		0.00200571	0.000517131	0.00219419	0.0020664	0.00103526	0.00156374	0.156374
GH55	0.000761759	0.000444575	0.000351917	0	0	0.00031165	0.031165		0.000854305	0.00220923	0	0	0.000295348	0.000671777	0.0671777
GH57	0.00675631	0.00801996	0.00783272	0.0149219	0.0211723	0.0117406	1.17406		0.00815187	0.00965461	0.00820847	0.00909812	0.0079613	0.00861487	0.861487
GH63	0	0.000760013	0.000451913	0	0	0.000242385	0.0242385		0.000994747	0	0.000381915	0.000909066	0.000855927	0.000628331	0.0628331
GH64	0.000454775	0.000594548	0	0	0.0009445	0.000398765	0.0398765		0.000677253	0	0	0.000320866	0	0.000199624	0.0199624
GH65	0	0.000224294	0	0.000478224	0	0.000140504	0.0140504		0.00037443	0	0	0	0.000267583	0.000128403	0.0128403
GH67	0.00415029	0.00243393	0.00272585	0.00208643	0.00164178	0.00260766	0.260766		0.00240546	0.00451655	0.00380288	0.00225257	0.00353775	0.00330304	0.330304
GH73	0.00580713	0.00886117	0.00410413	0.00475562	0.00842458	0.00639053	0.639053		0.00769952	0.00674081	0.00593507	0.00877749	0.00795701	0.00742198	0.742198
GH77	0.0102112	0.0103284	0.0117333	0.00990957	0.0122084	0.0108782	1.08782		0.0124275	0.0112189	0.00998682	0.00928399	0.0107602	0.0107355	1.07355
GH78	0.0074565	0.012909	0.00529958	0.00691967	0.0145895	0.00943486	0.943486		0.00870605	0.0117667	0.0070782	0.00633313	0.00687295	0.0081514	0.81514
GH8	0.00478595	0.00468357	0.0068238	0.00594678	0.00595521	0.00563906	0.563906		0.00373522	0.00329124	0.009519	0.00724669	0.00661918	0.00608227	0.608227
GH84	0	0.000557825	0.000178215	0.000979635	0	0.000343135	0.0343135		0.00126297	0.00126975	0.000210929	0.000319496	0	0.00061263	0.061263
GH87	0	0.000811437	0	0	0.000240317	0.000210351	0.0210351		0.000838652	0.00267986	0	0.000227915	0	0.000749284	0.0749284
GH88	0.000619543	0.000680878	0.0011662	0.000383382	0.00248112	0.00106623	0.106623		0.00233306	0.0021168	0.00219452	0.00243717	0.00129449	0.00207521	0.207521
GH89	0.00453414	0.00522246	0.00382533	0.0045811	0.00339777	0.00431216	0.431216		0.00355602	0.00378515	0.00196221	0.0039959	0.00481294	0.00362244	0.362244
GH9	0.017405	0.00645694	0.0104707	0.00907183	0.0173208	0.0121451	1.21451		0.0071502	0.00659592	0.00988944	0.00574694	0.00970836	0.00781817	0.781817
GH92	0.014866	0.017394	0.01748	0.0174217	0.0262064	0.0186736	1.86736		0.0214995	0.013757	0.0204841	0.0243299	0.0186476	0.0197436	1.97436
GH94	0.029493	0.0226078	0.0308376	0.029093	0.0176935	0.025945	2.5945		0.0272662	0.0207257	0.0278843	0.031355	0.0267309	0.0267924	2.67924
GH95	0.00640054	0.00713015	0.00783074	0.00354673	0.00777153	0.00653594	0.653594		0.0064849	0.00707402	0.00678806	0.00687712	0.00578177	0.00660117	0.660117
GH97	0.0204749	0.0242316	0.0221029	0.0217413	0.0195536	0.0216209	2.16209		0.0246264	0.0217756	0.0224148	0.0217699	0.0193469	0.0219867	2.19867
GH98	0.000853429	0.000283513	0.00110737	0.00110833	0.000258192	0.000722168	0.0722168		0.000392823	0.00172805	0.000615141	0	0.000310572	0.000609317	0.0609317
GT0	0.00242791	0.00549708	0.00215839	0.00241073	0.00108068	0.00271496	0.271496		0.00376655	0.00142743	0.00345469	0	0.00185071	0.00209988	0.209988
GT112	0	0	0	0	0	0	0		0.000321819	0.000383308	0	0.000373518	0	0.000215729	0.0215729
GT19	0.00420124	0.00478024	0.00500165	0.0048448	0.00486077	0.00473774	0.473774		0.00426922	0.00422409	0.00456367	0.00509124	0.00444335	0.00451831	0.451831
GT2	0.0551408	0.0495762	0.0505461	0.0439443	0.0497358	0.0497886	4.97886		0.0535716	0.0623664	0.0537302	0.0426054	0.0594331	0.0543413	5.43413
GT26	0.000317978	0.0024281	0.00167079	0.000993345	0.00174884	0.00143181	0.143181		0.000793495	0.000364692	0.000594318	0.000801061	0.000667414	0.000644196	0.0644196
GT27	0.00014833	0	0.000810808	0.000632472	0.000130172	0.000344357	0.0344357		0.00187516	0	0.000396579	0	0.00155621	0.000765589	0.0765589
GT28	0.00473603	0.00613652	0.00669271	0.00636449	0.00488549	0.00576305	0.576305		0.00419862	0.0064208	0.00598287	0.00613159	0.00622039	0.00579086	0.579086
GT3	0.000917795	0.00212107	0.00160504	0.00106711	0.00358142	0.00185849	0.185849		0.00305941	0.00488671	0.00396147	0.00411618	0.0030166	0.00380807	0.380807
GT30	0.00177816	0.00340842	0.00467993	0.00545141	0.0016343	0.00339045	0.339045		0.00159045	0.00492643	0.00324017	0.00362142	0.0043264	0.00354097	0.354097
GT32	0.00280049	0.00130781	0.000810653	0.000276307	0.000642673	0.00116759	0.116759		0.00158697	0.0014352	0.000942954	0.00076371	0.000429885	0.00103174	0.103174
GT33	0.00114944	0	0	0	0	0.000229888	0.0229888		0.000526282	0.000731675	0.000227792	0	0.000249518	0.000347053	0.0347053
GT35	0.0164338	0.0130926	0.0138703	0.0173491	0.012848	0.0147188	1.47188		0.0162371	0.016339	0.0164046	0.016178	0.014963	0.0160243	1.60243
GT39	0	0.000550488	0	0	0	0.000110098	0.0110098		0.000343667	0.000361209	0.00042596	0.000177433	0	0.000261654	0.0261654
GT4	0.0268871	0.0253504	0.0247994	0.0218551	0.0306579	0.02591	2.591		0.0271141	0.0386233	0.026094	0.0250906	0.0258481	0.028554	2.8554
GT5	0.00995163	0.0153403	0.0107511	0.0134168	0.0114985	0.0121917	1.21917		0.00959118	0.00856562	0.00846894	0.00771786	0.0113793	0.00914458	0.914458
GT50	0.000898232	0.000341039	0	0	0	0.000247854	0.0247854		0	0.00132346	0.000235408	0	0.000375146	0.000386802	0.0386802
GT51	0.0116688	0.0156934	0.00970702	0.0151075	0.0104646	0.0125283	1.25283		0.0178647	0.0135686	0.0134834	0.0145956	0.0162497	0.0151524	1.51524
GT57	0.000295013	0	0	0	0	5.90025e-05	0.00590025		0	0.000774019	0	0.000248407	0.00029547	0.000263579	0.0263579
GT66	0.00186392	0	0.000471337	0.000794494	0.000780476	0.000782045	0.0782045		0.00247722	0.00102152	0	0.000300833	0.000891013	0.000938116	0.0938116
GT8	0	0.000201095	0	0.000510106	0.000733361	0.000288912	0.0288912		0.000334431	0.000545594	0	0	0.000161262	0.000208258	0.0208258
GT83	0.000945063	0.000825046	0.000295198	0.000378936	0.000446302	0.000578109	0.0578109		0.000603854	0.00154486	0.000458211	0.000399225	0.000207615	0.000642753	0.0642753
GT9	0.00383811	0.00194142	0.00303986	0.00389138	0.00349462	0.00324108	0.324108		0.00297974	0.00574417	0.0029136	0.00193555	0.00262005	0.00323862	0.323862
GT94	0	0.00101067	0.000331781	0.000198544	0.000769992	0.000462197	0.0462197		0.00184302	0	0.00119118	0.000729354	0.00104725	0.000962162	0.0962162
PL1	0.00588214	0.00533468	0.00618539	0.00375784	0.0123266	0.00669732	0.669732		0.0030874	0.0127813	0.0053058	0.007434	0.0045977	0.00664124	0.664124
PL10	0.00048249	0.000903301	0.000164843	0	0.00152701	0.000615529	0.0615529		0.000439671	0.00179362	0.000956293	0.00123598	0.000734905	0.00103209	0.103209
PL11	0.00126132	0.000954761	0.00230238	0.000923725	0.00369623	0.00182768	0.182768		0.000668944	0.000428969	0.00115975	0.00208055	0.00222625	0.00131289	0.131289
PL26	0	0.000359986	0.000400714	0	0.00148019	0.000448177	0.0448177		0.000160669	0	0	0.000341137	0.000647029	0.000229767	0.0229767
PL33	0.000867742	0.00113179	0.000658799	0.000816176	0.000669454	0.000828791	0.0828791		0	0	0.00140999	0.000684639	0.00209585	0.000838096	0.0838096
PL9	0.00205405	0.000258348	0.000226215	0	0.00142005	0.000791734	0.0791734		0.000313052	0	0.000486859	0.00109554	0.00100825	0.00058074	0.058074

## Sheet: CAZyme families
Abundance of CAZyme families mapped on transcripts per million					DeSeq2 analysis of CAZyme families
CAZyme_familes	Buffalo	Cattle			CAZY	log2FC	lfcSE	Pvalues	FDR
CBM1	0.141967	0			CBM1	-7.0138	2.9018	0.015649	0.18648
CBM11	0.13627	0.084927			CBM11	-0.7185	0.57521	0.21162	0.69516
CBM13	0.877039	0.639955			CBM13	-0.48775	0.2684	0.069181	0.43013
CBM20	0.482203	0.577819			CBM20	0.22512	0.23034	0.32841	0.8239
CBM22	0.14968	0.0114837			CBM22	-3.7702	1.0663	0.00040648	0.014532
CBM25	0.0299889	0.00743884			CBM25	-2.0501	2.5399	0.41958	0.84013
CBM26	0.0304292	0.003061			CBM26	-4.2433	2.1855	0.052183	0.39134
CBM3	0.0757297	0.00694213			CBM3	-3.7494	1.7954	0.036767	0.32668
CBM30	0.0421827	0.0481105			CBM30	0.16673	1.2801	0.89638	0.98205
CBM32	0.486338	0.40021			CBM32	-0.27506	0.3725	0.46026	0.84013
CBM34	0.070559	0.0219849			CBM34	-1.6753	1.3522	0.21535	0.69516
CBM35	0.17523	0.197992			CBM35	0.15575	0.35716	0.66277	0.9356
CBM4	0.0502862	0.0444943			CBM4	-0.17905	1.5001	0.90499	0.98205
CBM48	1.03792	0.864406			CBM48	-0.32197	0.25839	0.21274	0.69516
CBM50	0.436087	0.522387			CBM50	0.18199	0.3684	0.62131	0.91595
CBM51	0.0167596	0.0250502			CBM51	0.66988	2.0784	0.74723	0.96668
CBM57	0.0736787	0.0715214			CBM57	0.037704	1.2064	0.97507	0.98205
CBM6	1.52295	1.75096			CBM6	0.17983	0.16529	0.2766	0.75101
CBM61	0.0870214	0.0263517			CBM61	-1.7393	1.1232	0.12148	0.61525
CBM62	0.0741852	0.0207712			CBM62	-1.9218	1.3238	0.14657	0.64816
CBM67	0.148585	0.160447			CBM67	0.12185	0.68833	0.85949	0.97874
CBM72	0.0735091	0.0985805			CBM72	0.41773	0.70582	0.55396	0.88368
CBM77	0.0441885	0.0212963			CBM77	-1.0908	2.0815	0.60026	0.90355
CBM79	0.218664	0.029162			CBM79	-3.0744	2.0306	0.13002	0.61976
CBM88	0	0.0240027			CBM88	3.7478	2.2632	0.09772	0.5293
CBM9	0.0371483	0.032345			CBM9	-0.12603	1.4384	0.93018	0.98205
CBM91	0.602366	0.694801			CBM91	0.22324	0.3573	0.5321	0.88368
CE1	3.8891	4.29436			CE1	0.11959	0.12959	0.35607	0.84013
CE11	0.46334	0.559686			CE11	0.20877	0.278	0.45267	0.84013
CE12	0.567382	0.416291			CE12	-0.46137	0.32373	0.15411	0.64816
CE15	0.494614	0.566183			CE15	0.21438	0.26952	0.42638	0.84013
CE19	0.115856	0.0657303			CE19	-0.88133	1.0619	0.40657	0.84013
CE2	0.135993	0.187328			CE2	0.52295	0.4423	0.23707	0.72131
CE20	0.326759	0.475869			CE20	0.52449	0.25388	0.038836	0.32668
CE4	0.379733	0.301417			CE4	-0.41659	0.36256	0.25055	0.74643
CE6	0.941694	0.851646			CE6	-0.16596	0.18893	0.37972	0.84013
CE7	0.211035	0.194601			CE7	-0.088557	0.3584	0.80484	0.96668
CE8	0.582667	0.651494			CE8	0.13898	0.23491	0.55409	0.88368
CE9	0.048784	0.104823			CE9	1.0351	0.81908	0.20632	0.69516
GH0	0.0775206	0.0497344			GH0	-0.70707	1.2484	0.57113	0.88773
GH1	0.463503	0.0793782			GH1	-2.6009	1.1685	0.026029	0.26587
GH10	2.15406	1.91261			GH10	-0.19004	0.15804	0.22919	0.71248
GH105	0.758983	0.638574			GH105	-0.29508	0.27653	0.28593	0.75101
GH106	0.465108	0.437135			GH106	-0.073952	0.2284	0.74611	0.96668
GH109	0.5641	0.51153			GH109	-0.16694	0.2463	0.4979	0.85013
GH11	0.332321	0.171852			GH11	-1.051	0.49837	0.03495	0.32668
GH115	0.655574	0.423205			GH115	-0.63205	0.22583	0.0051294	0.091688
GH116	0.122383	0.128398			GH116	0.098578	0.53494	0.8538	0.97874
GH120	0.355464	0.368662			GH120	0.025007	0.41274	0.95169	0.98205
GH125	0.181002	0.201989			GH125	0.1526	0.43062	0.72306	0.96633
GH127	0.574334	0.620631			GH127	0.096788	0.2706	0.72058	0.96633
GH13	8.02954	7.09403			GH13	-0.21397	0.14373	0.13658	0.63001
GH130	1.11793	1.26938			GH130	0.15255	0.21108	0.46987	0.84013
GH133	0.789376	0.874188			GH133	0.10106	0.49768	0.8391	0.97874
GH137	0.11192	0.0443178			GH137	-1.2896	0.99659	0.19564	0.69516
GH138	0.0580444	0.0267044			GH138	-1.1756	1.571	0.45428	0.84013
GH139	0.0314737	0.0291597			GH139	0.070995	1.9598	0.9711	0.98205
GH140	0.0783104	0.0499489			GH140	-0.71225	0.98585	0.47	0.84013
GH141	0.0716055	0.144124			GH141	0.92645	0.75331	0.21876	0.69516
GH142	0.0507322	0.0660109			GH142	0.28695	0.94591	0.76161	0.96668
GH143	0.0317832	0.0225314			GH143	-0.44907	1.9288	0.8159	0.96668
GH146	0.515394	0.71435			GH146	0.42611	0.30851	0.16722	0.66147
GH154	0.123553	0.144657			GH154	0.20832	0.90507	0.81796	0.96668
GH16	0.747914	0.805634			GH16	0.068308	0.18927	0.71817	0.96633
GH163	0.0148344	0.0693545			GH163	2.3359	1.4199	0.099937	0.5293
GH171	0.235172	0.369165			GH171	0.61057	0.39775	0.12477	0.61525
GH172	0.0196786	0.0193179			GH172	-0.054007	1.7358	0.97518	0.98205
GH18	0.287131	0.274096			GH18	-0.097868	0.41163	0.81207	0.96668
GH19	0.0270903	0.0127501			GH19	-1.3815	2.0138	0.49269	0.85013
GH2	2.62294	3.45528			GH2	0.38148	0.10164	0.00017468	0.01249
GH20	0.749591	1.07887			GH20	0.53387	0.21105	0.01142	0.16331
GH23	0.500895	0.721016			GH23	0.47625	0.23343	0.041327	0.32832
GH24	0.139523	0.159093			GH24	0.093612	0.78566	0.90516	0.98205
GH25	0.497777	0.458968			GH25	-0.13688	0.23726	0.56399	0.88626
GH26	0.610691	0.699866			GH26	0.18887	0.18314	0.30241	0.77224
GH27	1.11823	0.92901			GH27	-0.31075	0.16686	0.062559	0.40663
GH28	1.15786	1.19215			GH28	0.02676	0.1906	0.88834	0.98205
GH29	1.54512	1.81317			GH29	0.21501	0.15575	0.16744	0.66147
GH3	8.15397	7.84254			GH3	-0.082084	0.10425	0.43107	0.84013
GH30	0.605609	0.466488			GH30	-0.39998	0.30372	0.18786	0.69516
GH31	2.75049	2.70915			GH31	-0.056526	0.12182	0.64264	0.92809
GH32	0.944402	0.574117			GH32	-0.74953	0.26591	0.0048217	0.091688
GH33	0.416742	0.497091			GH33	0.26588	0.35532	0.45429	0.84013
GH35	0.512423	0.383913			GH35	-0.43157	0.31535	0.17115	0.66147
GH36	0.473207	0.64287			GH36	0.38259	0.35749	0.28452	0.75101
GH38	0.0821997	0.132011			GH38	0.61981	0.81971	0.44957	0.84013
GH39	0.159879	0.0543815			GH39	-1.6282	0.84758	0.054733	0.39134
GH4	0.0563412	0.090758			GH4	0.70018	1.2733	0.5824	0.89552
GH43	7.82864	8.37787			GH43	0.06235	0.14631	0.67	0.9356
GH45	0.544666	0.196466			GH45	-1.5057	0.42104	0.00034877	0.014532
GH5	3.00403	2.15319			GH5	-0.50264	0.16031	0.0017158	0.040894
GH51	1.41889	2.08048			GH51	0.52457	0.13424	9.3171e-05	0.01249
GH53	0.40479	0.49912			GH53	0.34429	0.3133	0.2718	0.75101
GH54	0.0660403	0.156374			GH54	1.1697	0.6727	0.082071	0.489
GH55	0.031165	0.0671777			GH55	1.0694	1.5059	0.47762	0.8432
GH57	1.17406	0.861487			GH57	-0.42192	0.24782	0.088656	0.50711
GH63	0.0242385	0.0628331			GH63	1.3055	1.4147	0.3561	0.84013
GH64	0.0398765	0.0199624			GH64	-0.98064	1.8572	0.59749	0.90355
GH65	0.0140504	0.0128403			GH65	-0.24433	2.3969	0.91881	0.98205
GH67	0.260766	0.330304			GH67	0.2838	0.33592	0.39821	0.84013
GH73	0.639053	0.742198			GH73	0.20812	0.24061	0.38706	0.84013
GH77	1.08782	1.07355			GH77	-0.03952	0.14176	0.78042	0.96668
GH78	0.943486	0.81514			GH78	-0.2213	0.26633	0.406	0.84013
GH8	0.563906	0.608227			GH8	0.10621	0.28946	0.71367	0.96633
GH84	0.0343135	0.061263			GH84	0.86359	1.3319	0.51672	0.8693
GH87	0.0210351	0.0749284			GH87	1.8713	1.7643	0.28885	0.75101
GH88	0.106623	0.207521			GH88	1.117	0.49455	0.023904	0.26295
GH89	0.431216	0.362244			GH89	-0.29885	0.27589	0.27871	0.75101
GH9	1.21451	0.781817			GH9	-0.64949	0.26112	0.012871	0.16732
GH92	1.86736	1.97436			GH92	0.08451	0.16494	0.60839	0.90625
GH94	2.5945	2.67924			GH94	0.0096802	0.1643	0.95302	0.98205
GH95	0.653594	0.660117			GH95	-0.0027553	0.22769	0.99034	0.99034
GH97	2.16209	2.19867			GH97	-0.010473	0.11916	0.92996	0.98205
GH98	0.0722168	0.0609317			GH98	-0.27731	0.99562	0.7806	0.96668
GT0	0.271496	0.209988			GT0	-0.41503	0.91189	0.64901	0.92809
GT112	0	0.0215729			GT112	3.5473	2.7044	0.18963	0.69516
GT19	0.473774	0.451831			GT19	-0.094056	0.20293	0.64302	0.92809
GT2	4.97886	5.43413			GT2	0.090514	0.11811	0.44345	0.84013
GT26	0.143181	0.0644196			GT26	-1.1479	0.61132	0.060418	0.40663
GT27	0.0344357	0.0765589			GT27	1.3455	1.486	0.36523	0.84013
GT28	0.576305	0.579086			GT28	-0.038674	0.20454	0.85003	0.97874
GT3	0.185849	0.380807			GT3	1.1114	0.35234	0.0016085	0.040894
GT30	0.339045	0.354097			GT30	0.021742	0.37922	0.95428	0.98205
GT32	0.116759	0.103174			GT32	-0.19646	0.68578	0.77452	0.96668
GT33	0.0229888	0.0347053			GT33	0.48065	1.8736	0.79754	0.96668
GT35	1.47188	1.60243			GT35	0.088606	0.13118	0.49938	0.85013
GT39	0.0110098	0.0261654			GT39	1.1642	1.9782	0.55616	0.88368
GT4	2.591	2.8554			GT4	0.11404	0.13707	0.40543	0.84013
GT5	1.21917	0.914458			GT5	-0.44986	0.16648	0.0068864	0.10942
GT50	0.0247854	0.0386802			GT50	0.4621	1.8666	0.80447	0.96668
GT51	1.25283	1.51524			GT51	0.23855	0.16594	0.15056	0.64816
GT57	0.00590025	0.0263579			GT57	1.9632	2.3267	0.39878	0.84013
GT66	0.0782045	0.0938116			GT66	0.27534	1.0508	0.79331	0.96668
GT8	0.0288912	0.0208258			GT8	-0.49009	1.779	0.78295	0.96668
GT83	0.0578109	0.0642753			GT83	0.14318	0.82605	0.86239	0.97874
GT9	0.324108	0.323862			GT9	-0.034128	0.33493	0.91884	0.98205
GT94	0.0462197	0.0962162			GT94	1.153	1.0235	0.25997	0.75101
PL1	0.669732	0.664124			PL1	-0.011665	0.35131	0.97351	0.98205
PL10	0.0615529	0.103209			PL10	0.8133	0.86012	0.34437	0.84013
PL11	0.182768	0.131289			PL11	-0.46231	0.56087	0.40978	0.84013
PL26	0.0448177	0.0229767			PL26	-0.99848	1.6395	0.54252	0.88368
PL33	0.0828791	0.0838096			PL33	0.076891	0.99526	0.93842	0.98205
PL9	0.0791734	0.058074			PL9	-0.47352	1.1253	0.67389	0.9356

## Sheet: GH family abundance
Abundance of GH class as per TPM					DeSeq2 analysis of GH class
GH family	Buffalo	Cattle				log2FC	lfcSE	Pvalues	FDR
GH0	0.0775206	0.0497344			GH51	0.52457	0.13424	9.3171e-05	0.01249
GH1	0.463503	0.0793782			GH2	0.38148	0.10164	0.00017468	0.01249
GH10	2.15406	1.91261			GH45	-1.5057	0.42104	0.00034877	0.014532
GH105	0.758983	0.638574			GH5	-0.50264	0.16031	0.0017158	0.040894
GH106	0.465108	0.437135			GH32	-0.74953	0.26591	0.0048217	0.091688
GH109	0.5641	0.51153			GH115	-0.63205	0.22583	0.0051294	0.091688
GH11	0.332321	0.171852			GH20	0.53387	0.21105	0.01142	0.16331
GH115	0.655574	0.423205			GH9	-0.64949	0.26112	0.012871	0.16732
GH116	0.122383	0.128398			GH88	1.117	0.49455	0.023904	0.26295
GH120	0.355464	0.368662			GH1	-2.6009	1.1685	0.026029	0.26587
GH125	0.181002	0.201989			GH11	-1.051	0.49837	0.03495	0.32668
GH127	0.574334	0.620631			GH23	0.47625	0.23343	0.041327	0.32832
GH13	8.02954	7.09403			GH39	-1.6282	0.84758	0.054733	0.39134
GH130	1.11793	1.26938			GH27	-0.31075	0.16686	0.062559	0.40663
GH133	0.789376	0.874188			GH54	1.1697	0.6727	0.082071	0.489
GH137	0.11192	0.0443178			GH57	-0.42192	0.24782	0.088656	0.50711
GH138	0.0580444	0.0267044			GH163	2.3359	1.4199	0.099937	0.5293
GH139	0.0314737	0.0291597			GH171	0.61057	0.39775	0.12477	0.61525
GH140	0.0783104	0.0499489			GH13	-0.21397	0.14373	0.13658	0.63001
GH141	0.0716055	0.144124			GH146	0.42611	0.30851	0.16722	0.66147
GH142	0.0507322	0.0660109			GH29	0.21501	0.15575	0.16744	0.66147
GH143	0.0317832	0.0225314			GH35	-0.43157	0.31535	0.17115	0.66147
GH146	0.515394	0.71435			GH30	-0.39998	0.30372	0.18786	0.69516
GH154	0.123553	0.144657			GH137	-1.2896	0.99659	0.19564	0.69516
GH16	0.747914	0.805634			GH141	0.92645	0.75331	0.21876	0.69516
GH163	0.0148344	0.0693545			GH10	-0.19004	0.15804	0.22919	0.71248
GH171	0.235172	0.369165			GH53	0.34429	0.3133	0.2718	0.75101
GH172	0.0196786	0.0193179			GH89	-0.29885	0.27589	0.27871	0.75101
GH18	0.287131	0.274096			GH36	0.38259	0.35749	0.28452	0.75101
GH19	0.0270903	0.0127501			GH105	-0.29508	0.27653	0.28593	0.75101
GH2	2.62294	3.45528			GH87	1.8713	1.7643	0.28885	0.75101
GH20	0.749591	1.07887			GH26	0.18887	0.18314	0.30241	0.77224
GH23	0.500895	0.721016			GH63	1.3055	1.4147	0.3561	0.84013
GH24	0.139523	0.159093			GH73	0.20812	0.24061	0.38706	0.84013
GH25	0.497777	0.458968			GH67	0.2838	0.33592	0.39821	0.84013
GH26	0.610691	0.699866			GH78	-0.2213	0.26633	0.406	0.84013
GH27	1.11823	0.92901			GH3	-0.082084	0.10425	0.43107	0.84013
GH28	1.15786	1.19215			GH38	0.61981	0.81971	0.44957	0.84013
GH29	1.54512	1.81317			GH138	-1.1756	1.571	0.45428	0.84013
GH3	8.15397	7.84254			GH33	0.26588	0.35532	0.45429	0.84013
GH30	0.605609	0.466488			GH130	0.15255	0.21108	0.46987	0.84013
GH31	2.75049	2.70915			GH140	-0.71225	0.98585	0.47	0.84013
GH32	0.944402	0.574117			GH55	1.0694	1.5059	0.47762	0.8432
GH33	0.416742	0.497091			GH19	-1.3815	2.0138	0.49269	0.85013
GH35	0.512423	0.383913			GH109	-0.16694	0.2463	0.4979	0.85013
GH36	0.473207	0.64287			GH84	0.86359	1.3319	0.51672	0.8693
GH38	0.0821997	0.132011			GH25	-0.13688	0.23726	0.56399	0.88626
GH39	0.159879	0.0543815			GH0	-0.70707	1.2484	0.57113	0.88773
GH4	0.0563412	0.090758			GH4	0.70018	1.2733	0.5824	0.89552
GH43	7.82864	8.37787			GH64	-0.98064	1.8572	0.59749	0.90355
GH45	0.544666	0.196466			GH92	0.08451	0.16494	0.60839	0.90625
GH5	3.00403	2.15319			GH31	-0.056526	0.12182	0.64264	0.92809
GH51	1.41889	2.08048			GH43	0.06235	0.14631	0.67	0.9356
GH53	0.40479	0.49912			GH8	0.10621	0.28946	0.71367	0.96633
GH54	0.0660403	0.156374			GH16	0.068308	0.18927	0.71817	0.96633
GH55	0.031165	0.0671777			GH127	0.096788	0.2706	0.72058	0.96633
GH57	1.17406	0.861487			GH125	0.1526	0.43062	0.72306	0.96633
GH63	0.0242385	0.0628331			GH106	-0.073952	0.2284	0.74611	0.96668
GH64	0.0398765	0.0199624			GH142	0.28695	0.94591	0.76161	0.96668
GH65	0.0140504	0.0128403			GH77	-0.03952	0.14176	0.78042	0.96668
GH67	0.260766	0.330304			GH98	-0.27731	0.99562	0.7806	0.96668
GH73	0.639053	0.742198			GH18	-0.097868	0.41163	0.81207	0.96668
GH77	1.08782	1.07355			GH143	-0.44907	1.9288	0.8159	0.96668
GH78	0.943486	0.81514			GH154	0.20832	0.90507	0.81796	0.96668
GH8	0.563906	0.608227			GH133	0.10106	0.49768	0.8391	0.97874
GH84	0.0343135	0.061263			GH116	0.098578	0.53494	0.8538	0.97874
GH87	0.0210351	0.0749284			GH28	0.02676	0.1906	0.88834	0.98205
GH88	0.106623	0.207521			GH24	0.093612	0.78566	0.90516	0.98205
GH89	0.431216	0.362244			GH65	-0.24433	2.3969	0.91881	0.98205
GH9	1.21451	0.781817			GH97	-0.010473	0.11916	0.92996	0.98205
GH92	1.86736	1.97436			GH120	0.025007	0.41274	0.95169	0.98205
GH94	2.5945	2.67924			GH94	0.0096802	0.1643	0.95302	0.98205
GH95	0.653594	0.660117			GH139	0.070995	1.9598	0.9711	0.98205
GH97	2.16209	2.19867			GH172	-0.054007	1.7358	0.97518	0.98205
GH98	0.0722168	0.0609317			GH95	-0.0027553	0.22769	0.99034	0.99034
